# Supplementary material for: Asymmetric synthesis of atropisomeric arylpyrazoles via direct arylation of 5-aminopyrazoles with naphthoquinones
Source: Royal Society of Chemistry journal article supplement (doi:10.1039/d4ob00514g), 2024-01-01
Supplement: d4ob00514g1.pdf [file d4ob00514g1.pdf]

## **Asymmetric synthesis of atropisomeric arylpyrazoles via direct arylation of 5-aminopyrazoles with naphthoquinones**

Jiamin Liu, Xingfu Wei, Yue Wang, Jingping Qu and Baomin Wang\*

State Key Laboratory of Fine Chemicals, Department of Pharmaceutical Engineering, School of Chemical Engineering, Dalian University of Technology, Dalian 116024, People's Republic of China

### **Contents**

|                                                        |    |
|--------------------------------------------------------|----|
| 1. General information .....                           | 1  |
| 2. Procedures for the preparation of substrate 1 ..... | 1  |
| 3. Procedures for the preparation of substrate 2 ..... | 1  |
| 4. The racemization experiment .....                   | 2  |
| 5. HPLC traces .....                                   | 3  |
| 6. References .....                                    | 21 |
| 7. NMR spectra for compounds .....                     | 22 |
| 8. X-ray crystal structure of 3ha .....                | 75 |

## 1. General information

Unless otherwise noted, materials were purchased from commercial suppliers and used without further purification. Column chromatography was performed on silica gel (200~300 mesh). Enantiomeric excesses (ee) were determined by HPLC using corresponding commercial chiral columns as stated at 30 °C with UV detector at 254 nm. Optical rotations were reported as follows:  $[\alpha]_D^{25}$  (c g/100 mL, solvent). All  $^1\text{H}$  NMR spectra were recorded on a Bruker Avance II 400 MHz and Bruker Avance III 600 MHz,  $^{13}\text{C}$  NMR spectra were recorded on a Bruker Avance II 101 MHz and Bruker Avance III 151 MHz,  $^{19}\text{F}$  NMR spectra were recorded on a Bruker Avance II 376 MHz and Bruker Avance III 377 MHz with chemical shifts reported as ppm (in  $\text{CDCl}_3$ , TMS as an internal standard). Data for  $^1\text{H}$  NMR are recorded as follows: chemical shift ( $\delta$ , ppm), multiplicity (s = singlet, d = doublet, t = triplet, m = multiplet, br = broad singlet, dd = double doublet, coupling constants in Hz, integration). HRMS (ESI) was obtained with a HRMS/MS instrument (LTQ Orbitrap XL TM). The absolute configuration of **3ha** was assigned by the X-ray analysis.

Catalyst **C6** was synthesized according to the literature procedure.<sup>1</sup> The racemic products were synthesized using diphenylphosphinic acid as the catalyst.

## 2. Procedures for the preparation of substrate 1

5-Aminopyrazoles **1** were prepared according to the following procedure:<sup>2</sup>

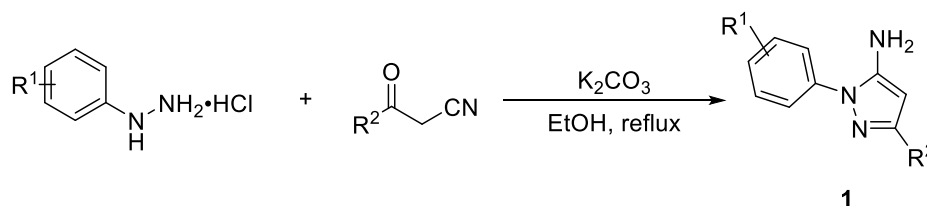

A solution of arylhydrazine hydrochloride (10 mmol, 1.0 equiv), potassium carbonate (11 mmol, 1.1 equiv) and alkyl formyl acetonitrile (11 mmol, 1.1 equiv) in  $\text{EtOH}$  (0.5 M relative to arylhydrazine hydrochloride) was heated to reflux for 6 h. After cooling to room temperature, the solution was concentrated under reduced pressure. The residue was dissolved in  $\text{CH}_2\text{Cl}_2$  and saturated  $\text{NaHCO}_3$  (aq.). The layers were separated, and the aqueous layer was extracted twice with  $\text{CH}_2\text{Cl}_2$ . The combined organic layers were washed with brine and dried with anhydrous  $\text{Na}_2\text{SO}_4$ . The salts were removed via gravity filtration, and the resulting solution was concentrated under reduced pressure. The crude mixture was purified by flash column chromatography on silica gel. In addition, substrates **1s** and **1t** were synthesized according to the literature procedure.<sup>3</sup>

## 3. Procedures for the preparation of substrate 2

1,4-Naphthoquinone derivatives **2** were prepared according to the following procedure:<sup>4</sup>

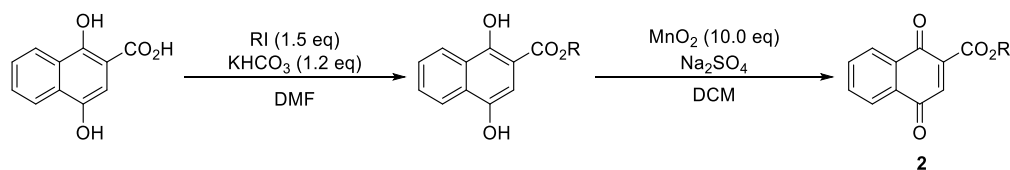

Solid  $\text{KHCO}_3$  (0.92 g, 11 mmol) was added to a stirred mixture of 1,4-dihydroxy-2-naphthoic acid (2.04 g, 10 mmol) and iodoalkane derivatives (11 mmol) in  $\text{DMF}$  (20 mL). The mixture was heated to

70 °C in an oil bath and stirred for 24 h. The reaction mixture was cooled down to room temperature, diluted with 1 M HCl (50 mL), and extracted with DCM (30 mL x 2). The organic phases were washed with water (20 mL x 2) and dried over MgSO<sub>4</sub>. After evaporation of the solvent, the residue was subjected to column chromatography on silica gel with petroleum ether/ethyl acetate 10:1 as eluting solvent to yield 1,4-dihydroxy-2-naphthoate.

Manganese dioxide (6.0 mmol) and magnesium sulfate (3.0 mmol) were added to the solution of 1,4-dihydroxy-2-naphthoate (1.0 mmol) and DCM (20 mL). The reaction mixture was stirred at 25 °C for 5 h, and the filtrate filtered by diatomite was evaporated in a vacuum to obtain the required quinone **2**.

#### 4. The racemization experiment

The enantiomerisation barrier was obtained by kinetic of racemization of an enantiomer. The slope of the first order kinetic line gives the racemization ( $k_{ent} = \frac{1}{2} k_{rac}$ ). Eyring equation gives the enantiomerisation barrier ( $\Delta G_T^\ddagger$ ) from enantiomerisation constant ( $k_{ent}$ ),  $R = 8.31451 \text{ J}\cdot\text{K}^{-1}\cdot\text{mol}^{-1}$ ,  $h = 6.62608 \times 10^{-34} \text{ J}\cdot\text{s}$ ,  $k_B = 1.38066 \times 10^{-23} \text{ J}\cdot\text{K}^{-1}$ . Enantiomeric excess values were determined by HPLC.

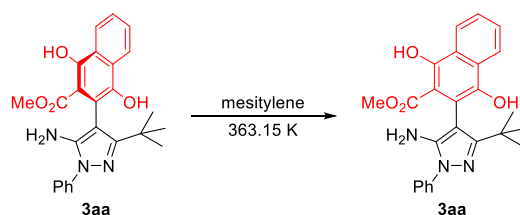

**Table S1.** Racemization of **3aa** in mesitylene at 90 °C.

| p/m   | (1+(p/m))/(1-(p/m)) | t/s   | ln[(1+(p/m))/(1-(p/m))] |
|-------|---------------------|-------|-------------------------|
| 0.065 | 1.138               | 0     | 0.129                   |
| 0.068 | 1.145               | 1800  | 0.136                   |
| 0.072 | 1.155               | 3600  | 0.144                   |
| 0.074 | 1.161               | 5400  | 0.149                   |
| 0.077 | 1.168               | 7200  | 0.155                   |
| 0.080 | 1.175               | 9000  | 0.161                   |
| 0.082 | 1.179               | 10800 | 0.165                   |
| 0.086 | 1.188               | 12600 | 0.172                   |
| 0.089 | 1.196               | 14400 | 0.179                   |
| 0.093 | 1.205               | 16200 | 0.187                   |

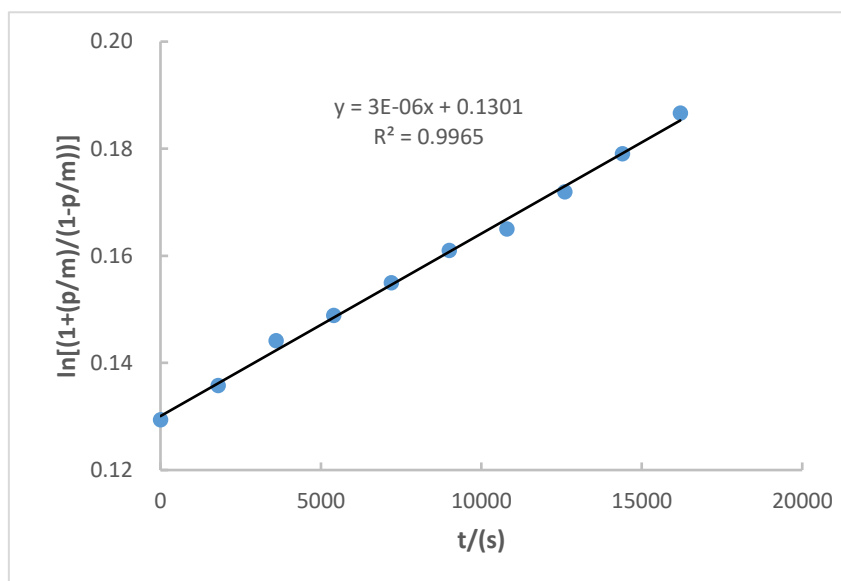

Figure S1. The plot of  $\ln[(1+(p/m))/(1-(p/m))]$  vs time of **3aa** at 90 °C

T = 90 °C (mesitylene);  $k_{ent} = \frac{1}{2} k_{rac} = \frac{1}{2} slope = 1.5 \times 10^{-6} \text{ s}^{-1}$ ;  $t_{1/2} = \ln 2/k_{rac} = 64.2 \text{ h}$ ;

$\Delta G_T^\ddagger = \ln\left(\frac{k_B T}{h \times k_{ent}}\right) RT = 130.03 \text{ kJ}\cdot\text{mol}^{-1} = 31.1 \text{ kcal}\cdot\text{mol}^{-1}$

T = 25 °C;  $k_{rac} = 2.06 \times 10^{-10} \text{ s}^{-1}$ ;  $t_{1/2} = \ln 2/k_{rac} = 107 \text{ years}$ ;

## 5. HPLC traces

### Compound 3aa

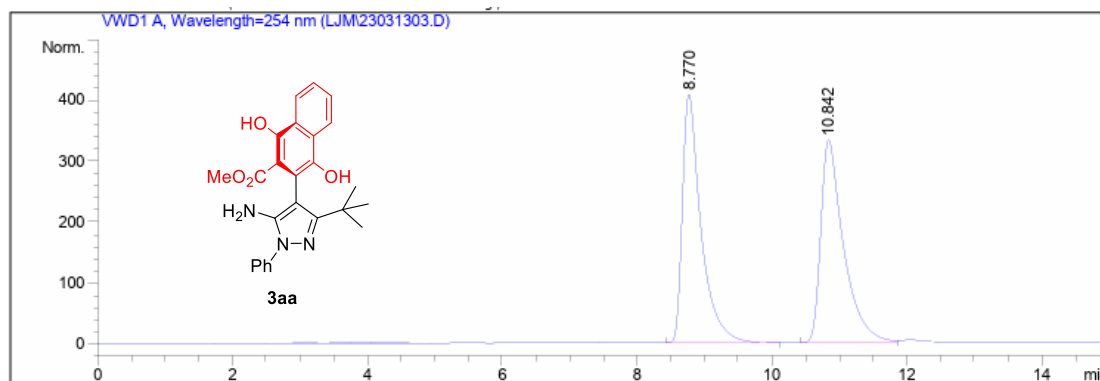

| Peak # | RetTime [min] | Type | Width [min] | Area mAU   | Area *s | Height [mAU] | Area %  |
|--------|---------------|------|-------------|------------|---------|--------------|---------|
| 1      | 8.770         | PB   | 0.2797      | 7782.17090 |         | 407.22647    | 50.0535 |
| 2      | 10.842        | BV   | 0.3382      | 7765.54541 |         | 332.29099    | 49.9465 |

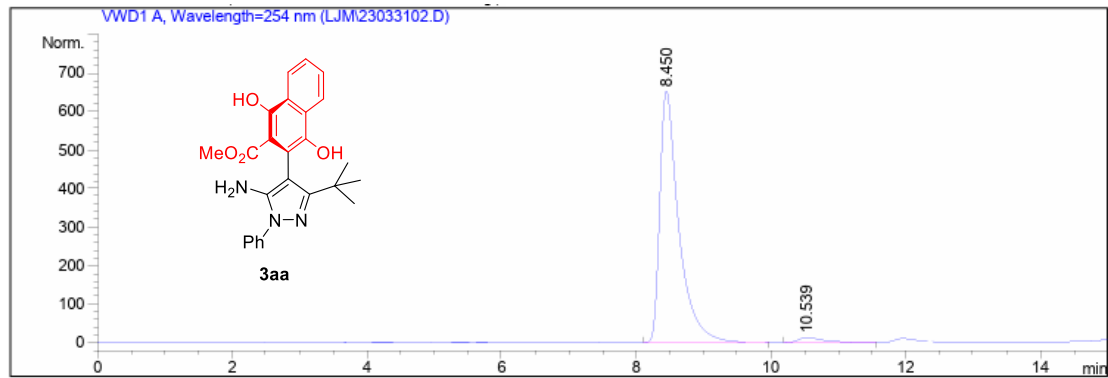

| Peak # | RetTime [min] | Type | Width [min] | Area mAU *s | Height [mAU] | Area %  |
|--------|---------------|------|-------------|-------------|--------------|---------|
| 1      | 8.450         | PB   | 0.2872      | 1.27107e4   | 651.93805    | 97.5408 |
| 2      | 10.539        | PB   | 0.3487      | 320.45697   | 13.20418     | 2.4592  |

### Compound 3ba

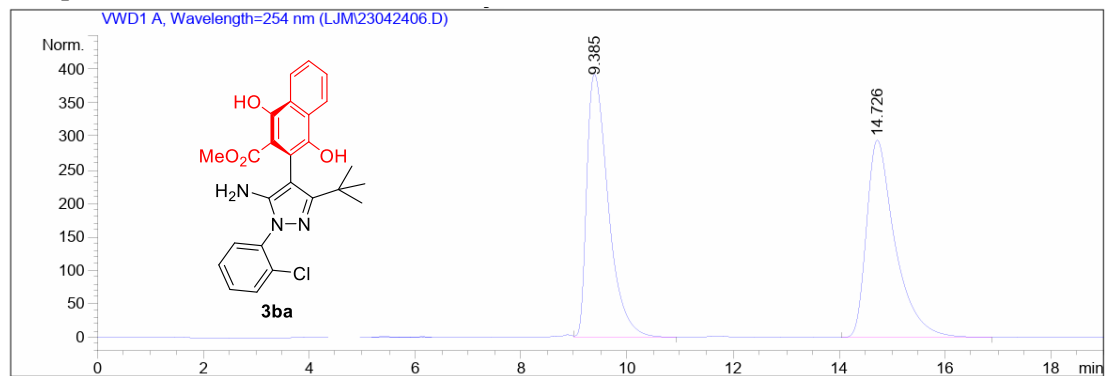

| Peak # | RetTime [min] | Type | Width [min] | Area mAU *s | Height [mAU] | Area %  |
|--------|---------------|------|-------------|-------------|--------------|---------|
| 1      | 9.385         | VB   | 0.4397      | 1.10865e4   | 393.07452    | 50.0192 |
| 2      | 14.726        | BB   | 0.5582      | 1.10780e4   | 294.55469    | 49.9808 |

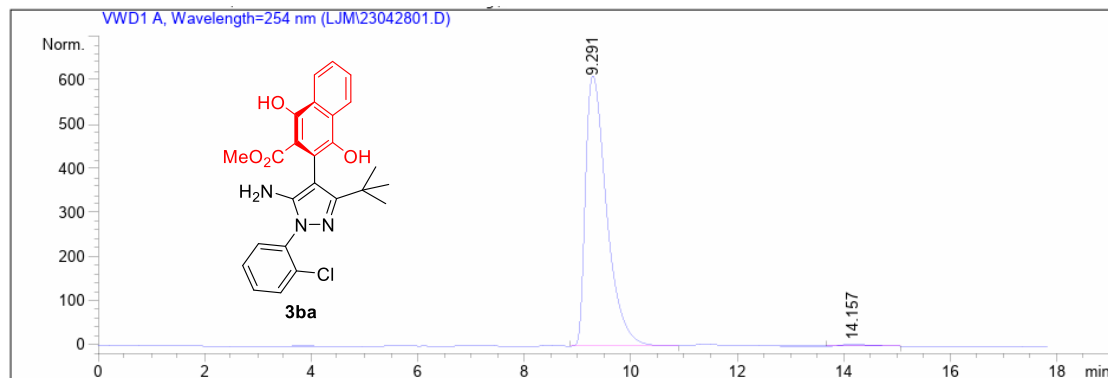

| Peak # | RetTime [min] | Type | Width [min] | Area mAU *s | Height [mAU] | Area %  |
|--------|---------------|------|-------------|-------------|--------------|---------|
| 1      | 9.291         | BB   | 0.4232      | 1.68656e4   | 612.52307    | 99.1009 |
| 2      | 14.157        | BB   | 0.4670      | 153.01498   | 4.87020      | 0.8991  |

### Compound 3ca

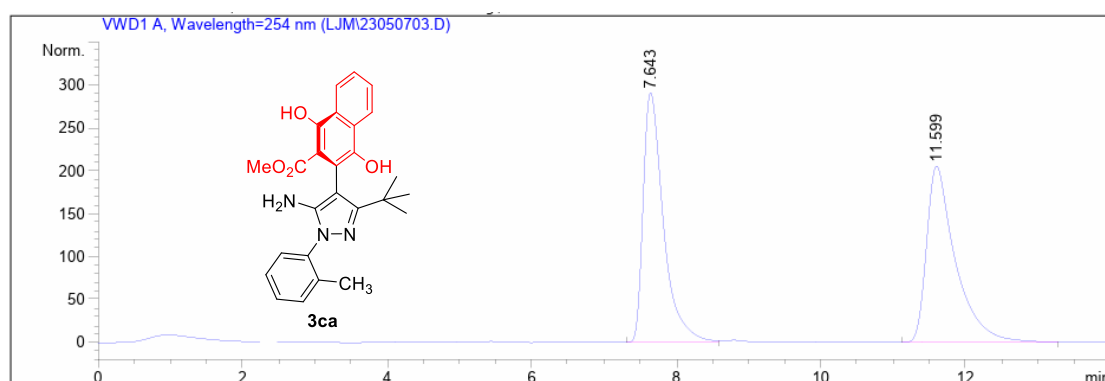

| Peak # | RetTime [min] | Type | Width [min] | Area mAU   | Area *s | Height [mAU] | Area %  |
|--------|---------------|------|-------------|------------|---------|--------------|---------|
| 1      | 7.643         | PV   | 0.2972      | 5663.50244 |         | 290.66556    | 49.9211 |
| 2      | 11.599        | BB   | 0.4001      | 5681.41602 |         | 205.25821    | 50.0789 |

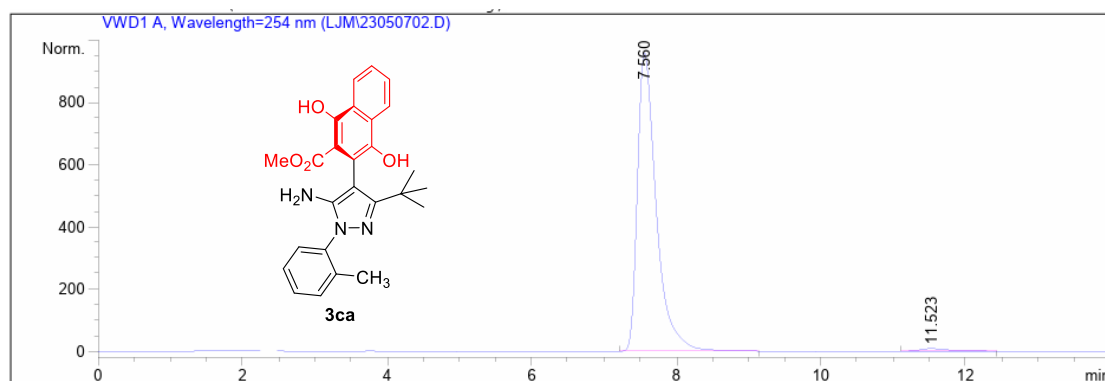

| Peak # | RetTime [min] | Type | Width [min] | Area mAU  | Area *s | Height [mAU] | Area %  |
|--------|---------------|------|-------------|-----------|---------|--------------|---------|
| 1      | 7.560         | BB   | 0.2740      | 1.73701e4 |         | 958.64136    | 98.7197 |
| 2      | 11.523        | BP   | 0.3984      | 225.27467 |         | 8.44999      | 1.2803  |

### Compound 3da

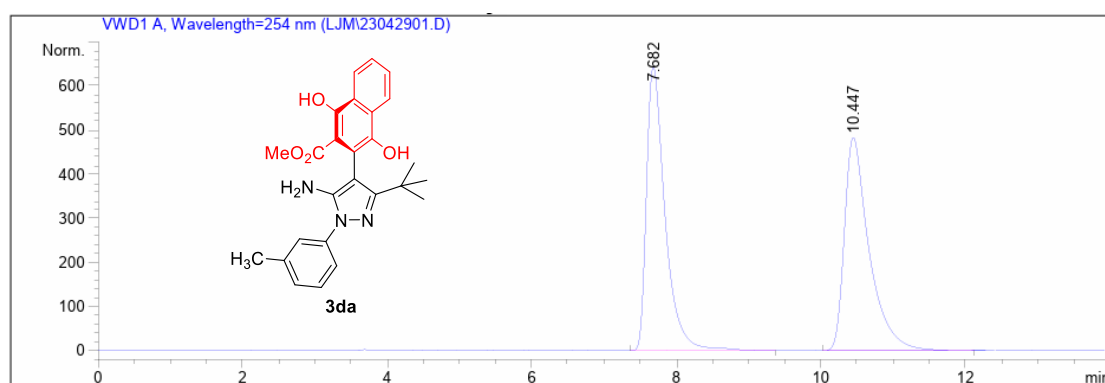

| Peak # | RetTime [min] | Type | Width [min] | Area mAU  | Area *s | Height [mAU] | Area %  |
|--------|---------------|------|-------------|-----------|---------|--------------|---------|
| 1      | 7.682         | PB   | 0.2680      | 1.14761e4 |         | 642.88098    | 50.0791 |
| 2      | 10.447        | BB   | 0.3464      | 1.14399e4 |         | 482.71222    | 49.9209 |

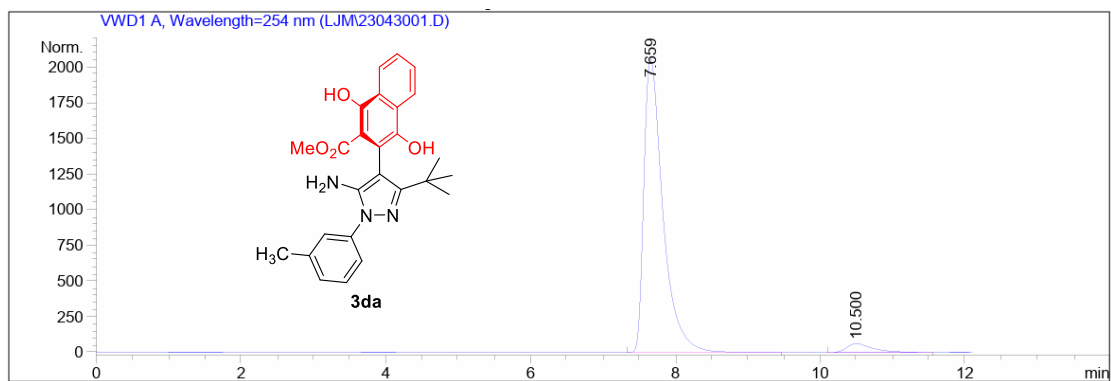

| Peak # | RetTime [min] | Type | Width [min] | Area mAU *s | Height [mAU] | Area %  |
|--------|---------------|------|-------------|-------------|--------------|---------|
| 1      | 7.659         | PB   | 0.2774      | 3.75162e4   | 2051.58301   | 96.0438 |
| 2      | 10.500        | PB   | 0.3643      | 1545.34241  | 62.15542     | 3.9562  |

### Compound 3ea

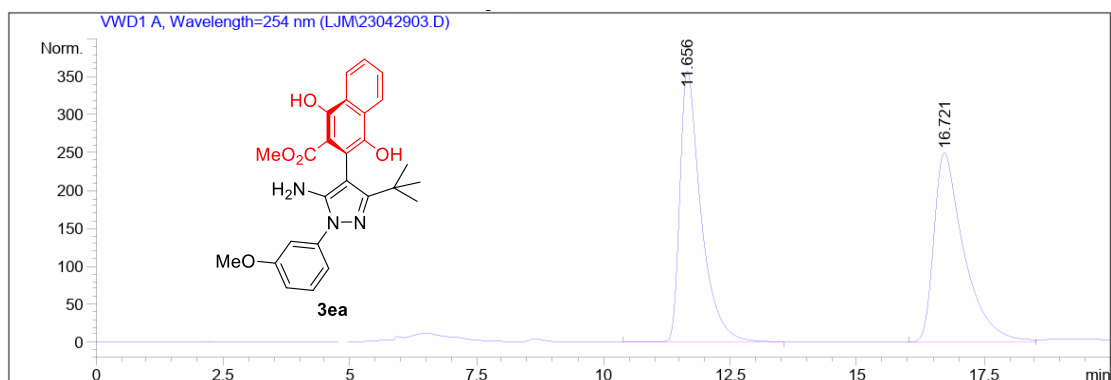

| Peak # | RetTime [min] | Type | Width [min] | Area mAU *s | Height [mAU] | Area %  |
|--------|---------------|------|-------------|-------------|--------------|---------|
| 1      | 11.656        | BB   | 0.4254      | 1.03263e4   | 357.91409    | 49.9805 |
| 2      | 16.721        | BB   | 0.6009      | 1.03343e4   | 249.62901    | 50.0195 |

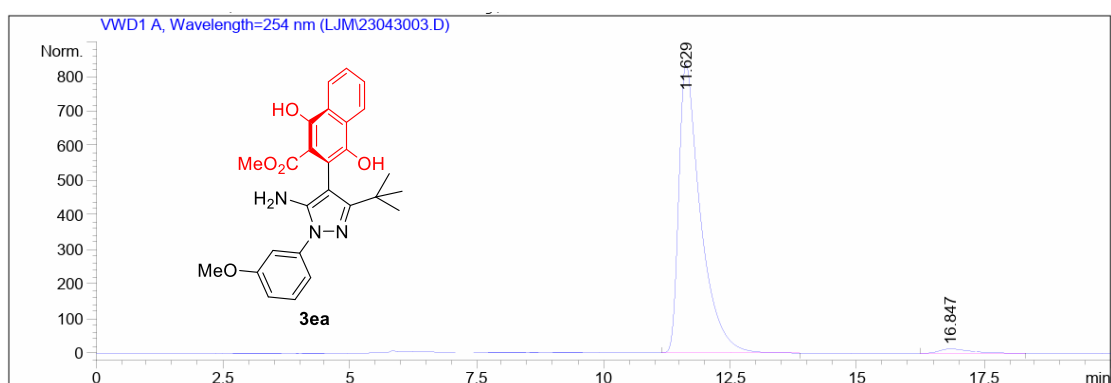

| Peak # | RetTime [min] | Type | Width [min] | Area mAU *s | Height [mAU] | Area %  |
|--------|---------------|------|-------------|-------------|--------------|---------|
| 1      | 11.629        | PB   | 0.4326      | 2.47935e4   | 834.29657    | 97.8797 |
| 2      | 16.847        | BB   | 0.6100      | 537.08673   | 12.77207     | 2.1203  |

### Compound 3fa

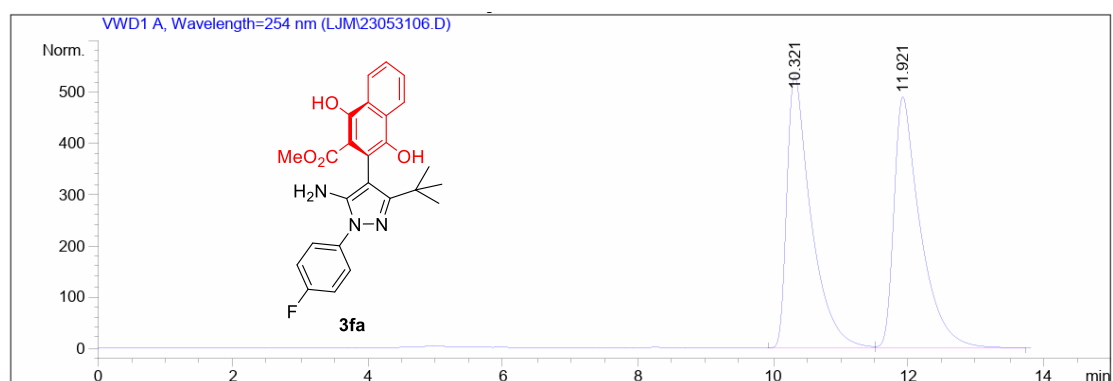

| Peak # | RetTime [min] | Type | Width [min] | Area mAU *s | Height [mAU] | Area %  |
|--------|---------------|------|-------------|-------------|--------------|---------|
| 1      | 10.321        | BV   | 0.3618      | 1.32058e4   | 530.50122    | 49.8582 |
| 2      | 11.921        | VB   | 0.3903      | 1.32809e4   | 490.25571    | 50.1418 |

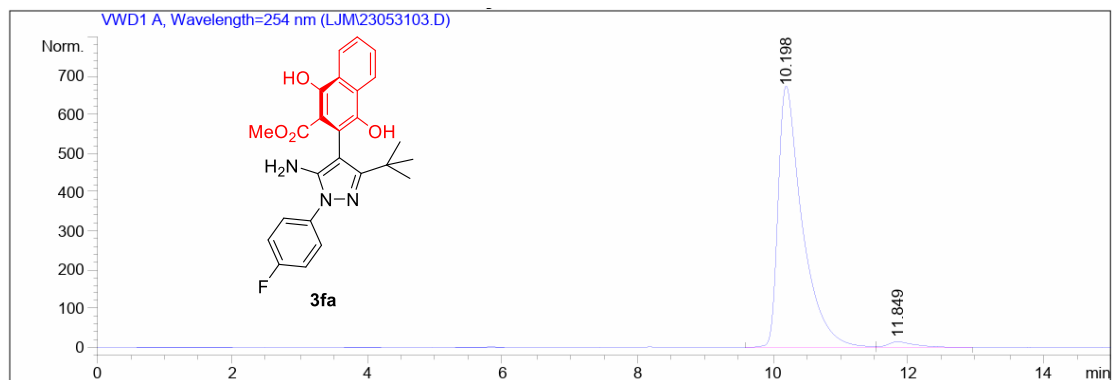

| Peak # | RetTime [min] | Type | Width [min] | Area mAU *s | Height [mAU] | Area %  |
|--------|---------------|------|-------------|-------------|--------------|---------|
| 1      | 10.198        | BV   | 0.3632      | 1.67727e4   | 673.93170    | 97.5583 |
| 2      | 11.849        | VB   | 0.4005      | 419.78558   | 14.81282     | 2.4417  |

### Compound 3ga

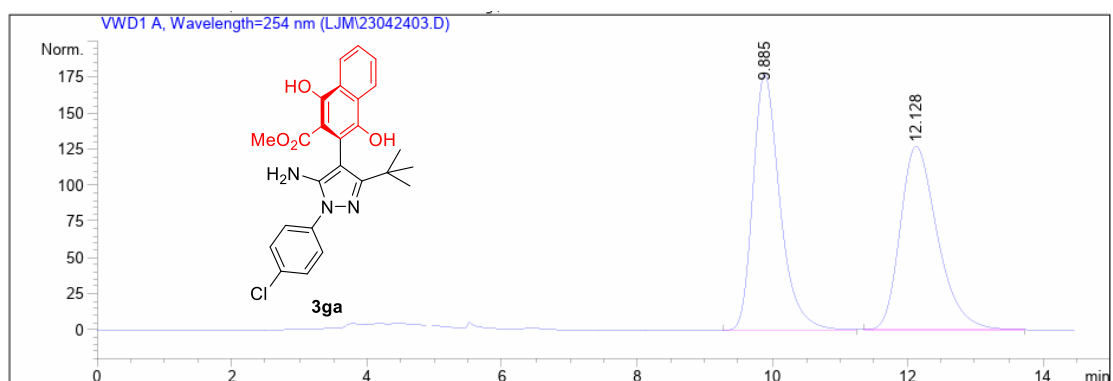

| Peak # | RetTime [min] | Type | Width [min] | Area mAU *s | Height [mAU] | Area %  |
|--------|---------------|------|-------------|-------------|--------------|---------|
| 1      | 9.885         | BB   | 0.4234      | 4925.13574  | 177.13052    | 50.1538 |
| 2      | 12.128        | BB   | 0.5915      | 4894.93848  | 127.24306    | 49.8462 |



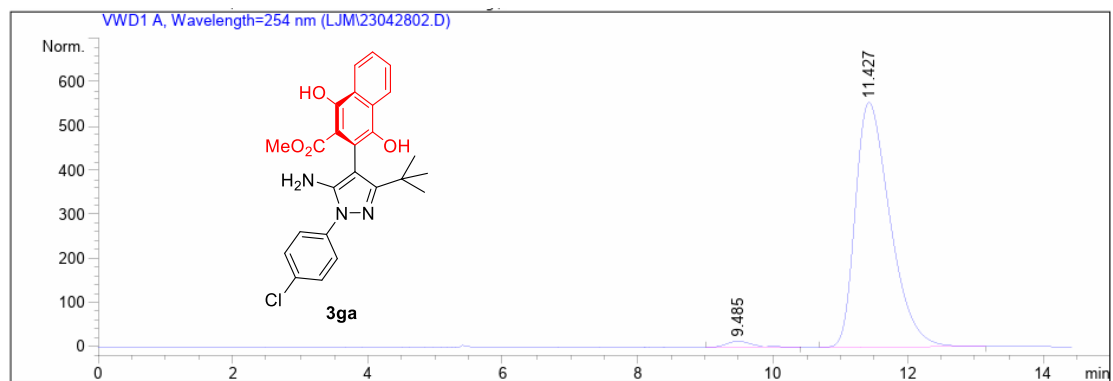

| Peak # | RetTime [min] | Type | Width [min] | Area mAU *s | Height [mAU] | Area %  |
|--------|---------------|------|-------------|-------------|--------------|---------|
| 1      | 9.485         | BB   | 0.4087      | 370.25998   | 13.69192     | 1.8379  |
| 2      | 11.427        | PB   | 0.5514      | 1.97756e4   | 554.60211    | 98.1621 |

### Compound 3ha

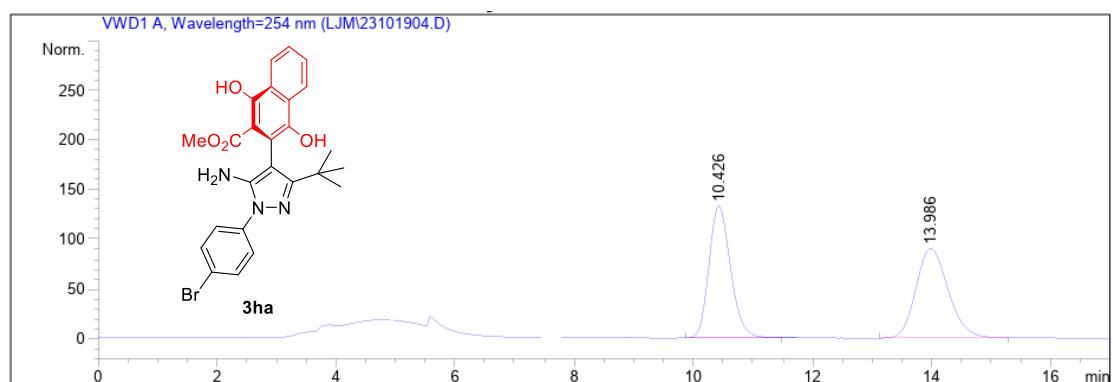

| Peak # | RetTime [min] | Type | Width [min] | Area mAU *s | Height [mAU] | Area %  |
|--------|---------------|------|-------------|-------------|--------------|---------|
| 1      | 10.426        | BB   | 0.3875      | 3336.92041  | 132.95291    | 49.7320 |
| 2      | 13.986        | BB   | 0.5791      | 3372.88892  | 90.16001     | 50.2680 |

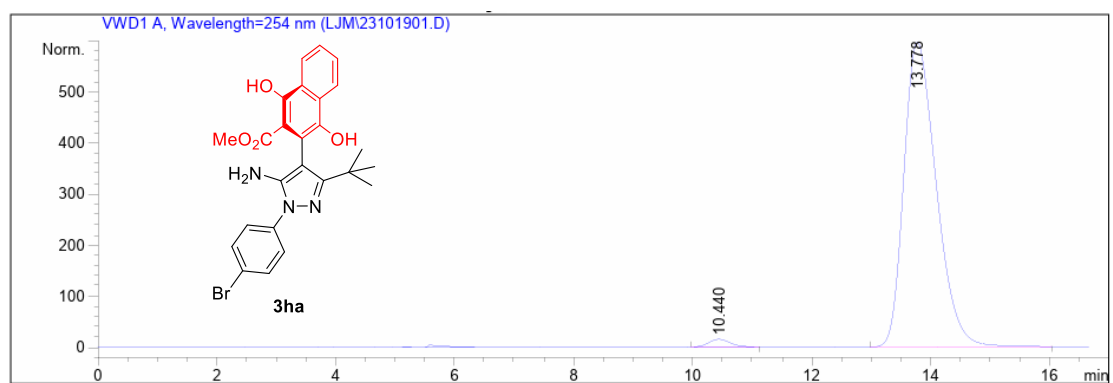

| Peak # | RetTime [min] | Type | Width [min] | Area mAU *s | Height [mAU] | Area %  |
|--------|---------------|------|-------------|-------------|--------------|---------|
| 1      | 10.440        | PB   | 0.3788      | 362.06198   | 14.78962     | 1.5810  |
| 2      | 13.778        | BB   | 0.5922      | 2.25381e4   | 596.58563    | 98.4190 |

## Compound 3ia

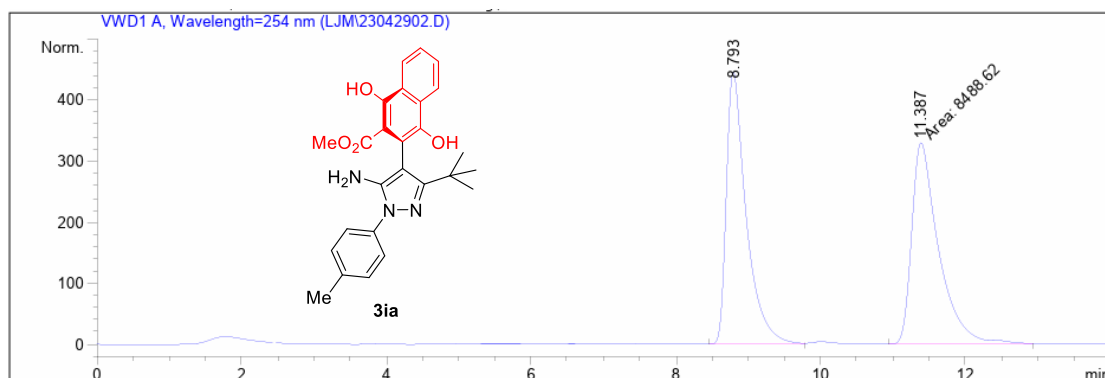

| Peak # | RetTime [min] | Type | Width [min] | Area mAU   | *s | Height [mAU] | Area %  |
|--------|---------------|------|-------------|------------|----|--------------|---------|
| 1      | 8.793         | PV   | 0.2800      | 8475.60254 |    | 445.90482    | 49.9616 |
| 2      | 11.387        | MM   | 0.4297      | 8488.61621 |    | 329.21371    | 50.0384 |

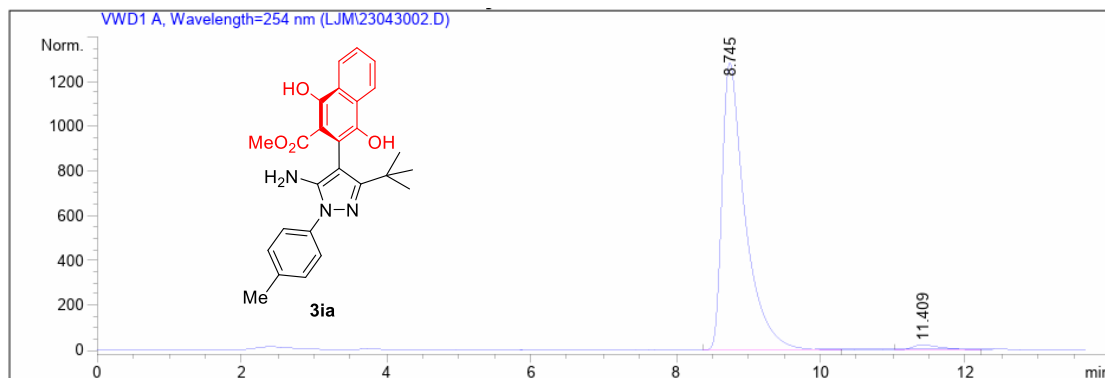

| Peak # | RetTime [min] | Type | Width [min] | Area mAU  | *s | Height [mAU] | Area %  |
|--------|---------------|------|-------------|-----------|----|--------------|---------|
| 1      | 8.745         | PB   | 0.3214      | 2.83127e4 |    | 1283.47046   | 97.8048 |
| 2      | 11.409        | VV   | 0.3994      | 635.46954 |    | 22.80053     | 2.1952  |

## Compound 3ja

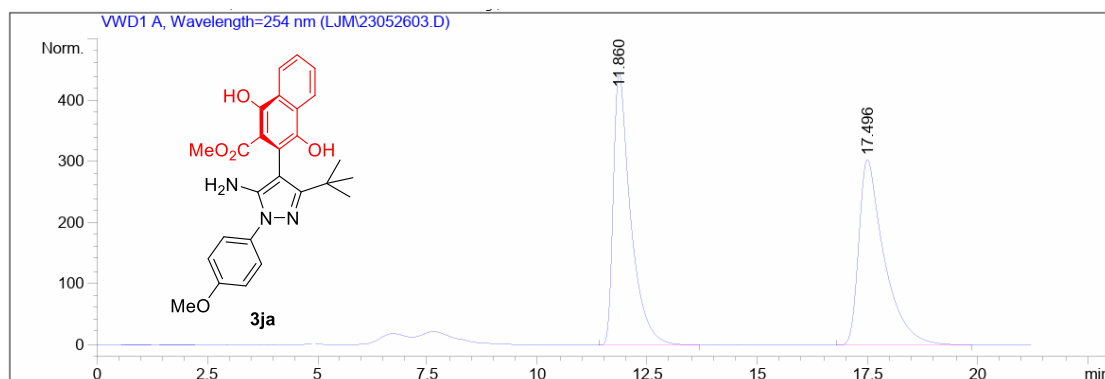

| Peak # | RetTime [min] | Type | Width [min] | Area mAU  | *s | Height [mAU] | Area %  |
|--------|---------------|------|-------------|-----------|----|--------------|---------|
| 1      | 11.860        | BB   | 0.3979      | 1.22208e4 |    | 446.51791    | 49.9967 |
| 2      | 17.496        | BB   | 0.5767      | 1.22224e4 |    | 304.08835    | 50.0033 |

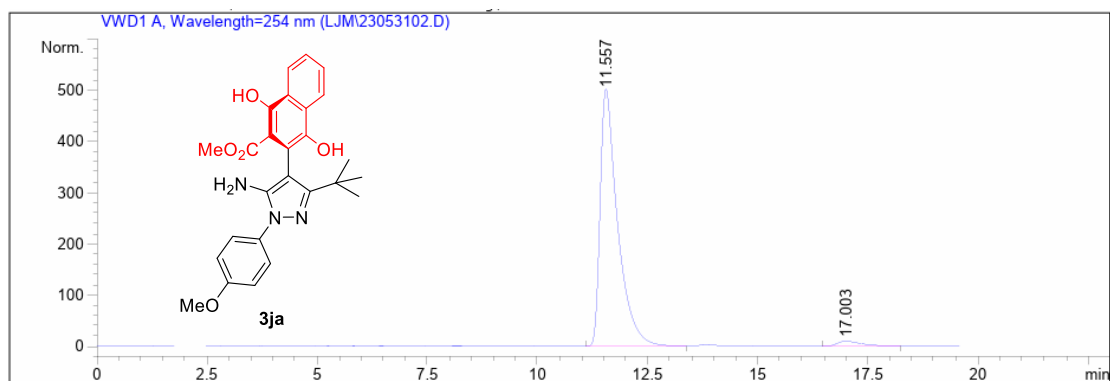

| Peak # | RetTime [min] | Type | Width [min] | Area mAU *s | Height [mAU] | Area %  |
|--------|---------------|------|-------------|-------------|--------------|---------|
| 1      | 11.557        | BB   | 0.3975      | 1.37811e4   | 501.90637    | 97.3789 |
| 2      | 17.003        | BB   | 0.5495      | 370.94406   | 9.86231      | 2.6211  |

### Compound 3ka

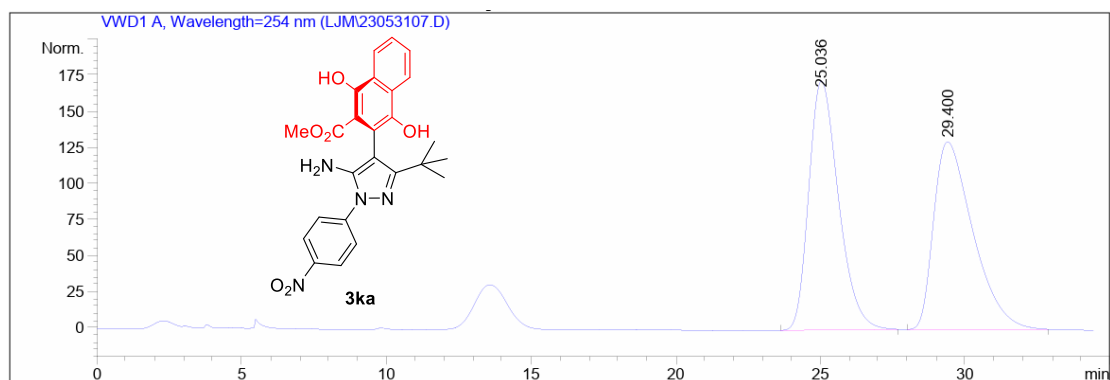

| Peak # | RetTime [min] | Type | Width [min] | Area mAU *s | Height [mAU] | Area %  |
|--------|---------------|------|-------------|-------------|--------------|---------|
| 1      | 25.036        | BB   | 1.1021      | 1.23472e4   | 172.68776    | 50.0983 |
| 2      | 29.400        | BB   | 1.4265      | 1.22988e4   | 130.05869    | 49.9017 |

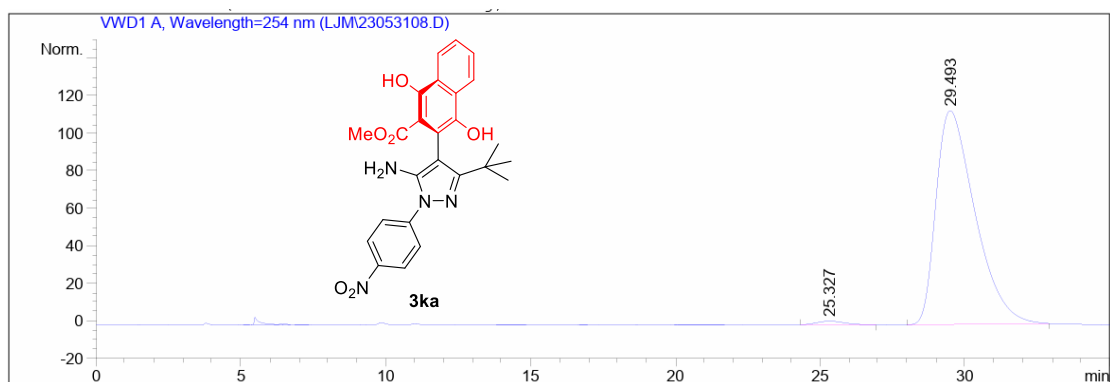

| Peak # | RetTime [min] | Type | Width [min] | Area mAU *s | Height [mAU] | Area %  |
|--------|---------------|------|-------------|-------------|--------------|---------|
| 1      | 25.327        | BB   | 0.8015      | 130.10416   | 1.93230      | 1.2022  |
| 2      | 29.493        | BB   | 1.3892      | 1.06920e4   | 114.21236    | 98.7978 |

### Compound 3la

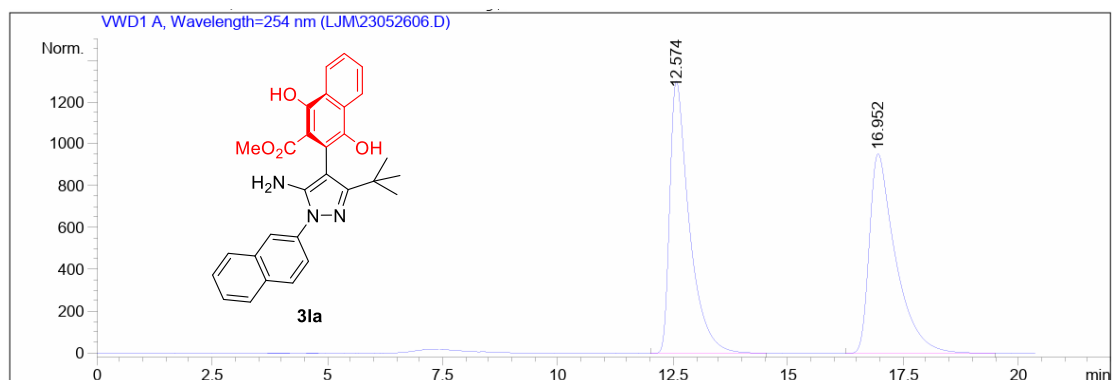

| Peak # | RetTime [min] | Type | Width [min] | Area mAU  | Area *s | Height [mAU] | Area %  |
|--------|---------------|------|-------------|-----------|---------|--------------|---------|
| 1      | 12.574        | VB   | 0.4339      | 3.82935e4 |         | 1300.10034   | 50.3948 |
| 2      | 16.952        | PB   | 0.5665      | 3.76935e4 |         | 952.59644    | 49.6052 |

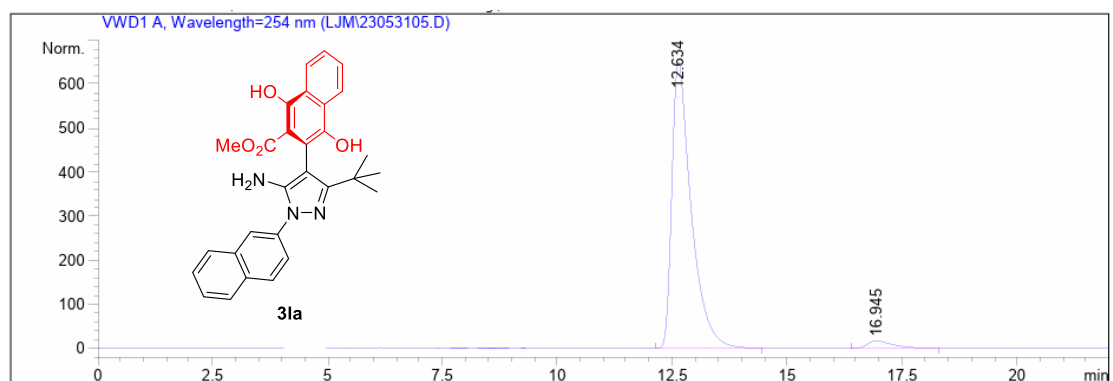

| Peak # | RetTime [min] | Type | Width [min] | Area mAU  | Area *s | Height [mAU] | Area %  |
|--------|---------------|------|-------------|-----------|---------|--------------|---------|
| 1      | 12.634        | PB   | 0.4280      | 1.89490e4 |         | 648.98395    | 96.7296 |
| 2      | 16.945        | BB   | 0.5534      | 640.66058 |         | 16.99238     | 3.2704  |

### Compound 3ma

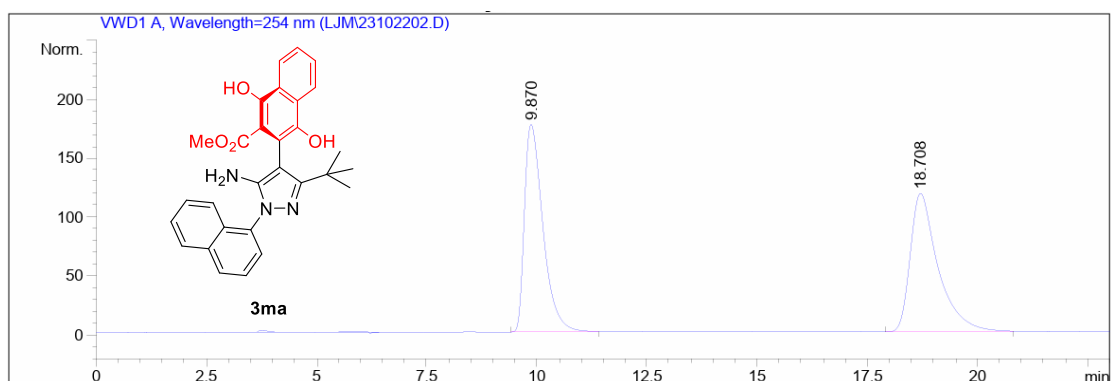

| Peak # | RetTime [min] | Type | Width [min] | Area mAU   | Area *s | Height [mAU] | Area %  |
|--------|---------------|------|-------------|------------|---------|--------------|---------|
| 1      | 9.870         | PB   | 0.4537      | 5129.75830 |         | 175.93369    | 49.9791 |
| 2      | 18.708        | PB   | 0.6441      | 5134.05420 |         | 117.40109    | 50.0209 |

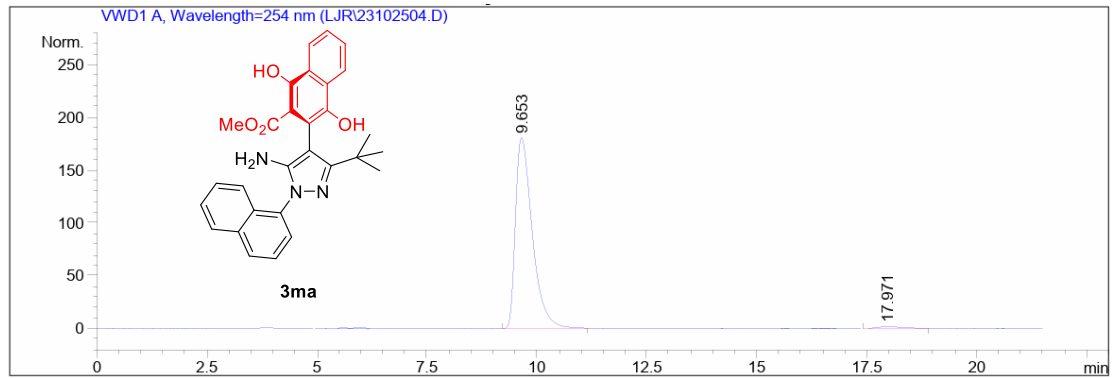

| Peak # | RetTime [min] | Type | Width [min] | Area mAU   | Area *s | Height [mAU] | Area %  |
|--------|---------------|------|-------------|------------|---------|--------------|---------|
| 1      | 9.653         | BB   | 0.4106      | 4805.28613 |         | 180.75287    | 98.6464 |
| 2      | 17.971        | BB   | 0.4658      | 65.93560   |         | 1.73846      | 1.3536  |

### Compound 3na

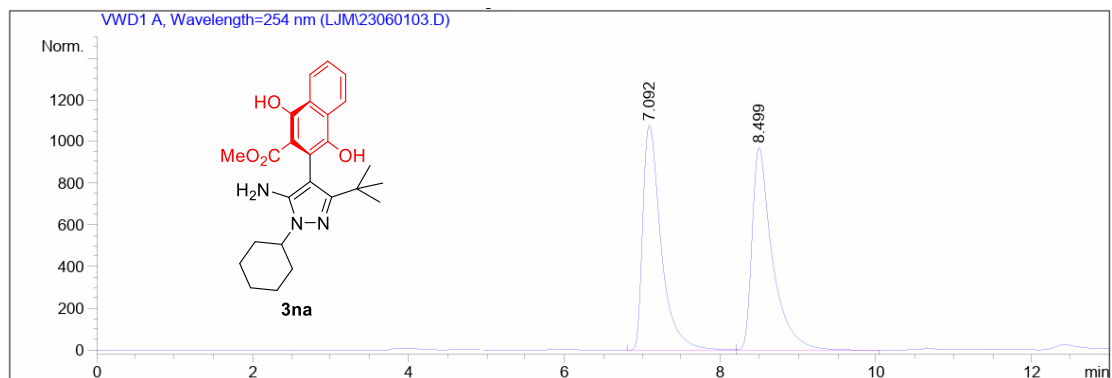

| Peak # | RetTime [min] | Type | Width [min] | Area mAU  | Area *s | Height [mAU] | Area %  |
|--------|---------------|------|-------------|-----------|---------|--------------|---------|
| 1      | 7.092         | BV   | 0.2458      | 1.75855e4 |         | 1077.07288   | 49.9738 |
| 2      | 8.499         | VB   | 0.2626      | 1.76040e4 |         | 970.44611    | 50.0262 |

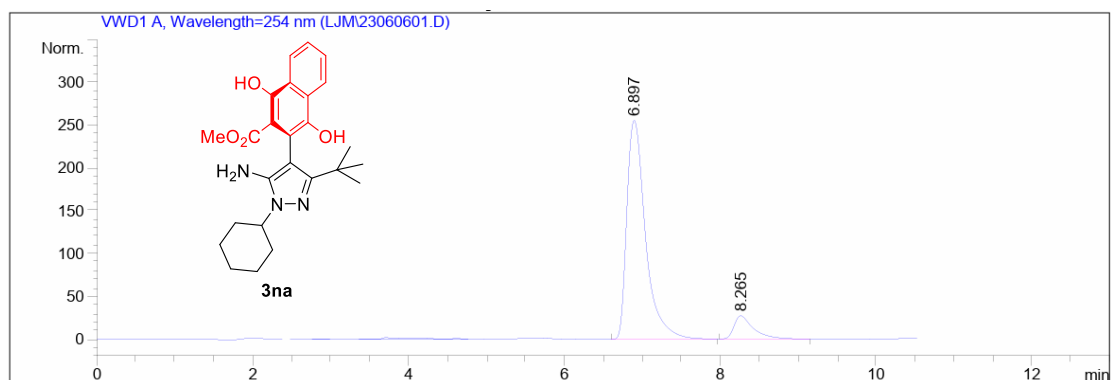

| Peak # | RetTime [min] | Type | Width [min] | Area mAU   | Area *s | Height [mAU] | Area %  |
|--------|---------------|------|-------------|------------|---------|--------------|---------|
| 1      | 6.897         | VB   | 0.2555      | 4246.07227 |         | 254.91765    | 89.9347 |
| 2      | 8.265         | BB   | 0.2519      | 475.20877  |         | 27.19509     | 10.0653 |

### Compound 3oa

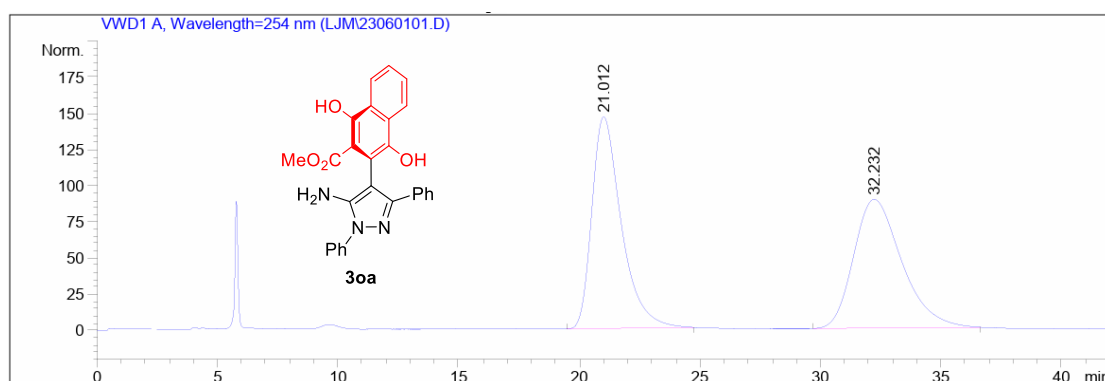

| Peak # | RetTime [min] | Type | Width [min] | Area mAU *s | Height [mAU] | Area %  |
|--------|---------------|------|-------------|-------------|--------------|---------|
| 1      | 21.012        | BB   | 1.2832      | 1.24291e4   | 146.39575    | 50.1288 |
| 2      | 32.232        | BB   | 2.0489      | 1.23652e4   | 89.08466     | 49.8712 |

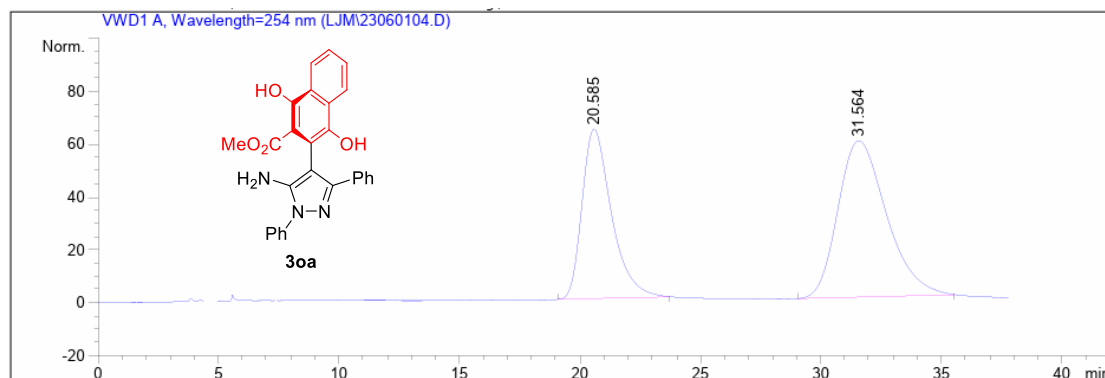

| Peak # | RetTime [min] | Type | Width [min] | Area mAU *s | Height [mAU] | Area %  |
|--------|---------------|------|-------------|-------------|--------------|---------|
| 1      | 20.585        | BB   | 1.2680      | 5428.79150  | 63.98292     | 39.5949 |
| 2      | 31.564        | BB   | 2.0285      | 8282.05469  | 59.08276     | 60.4051 |

### Compound 3pa

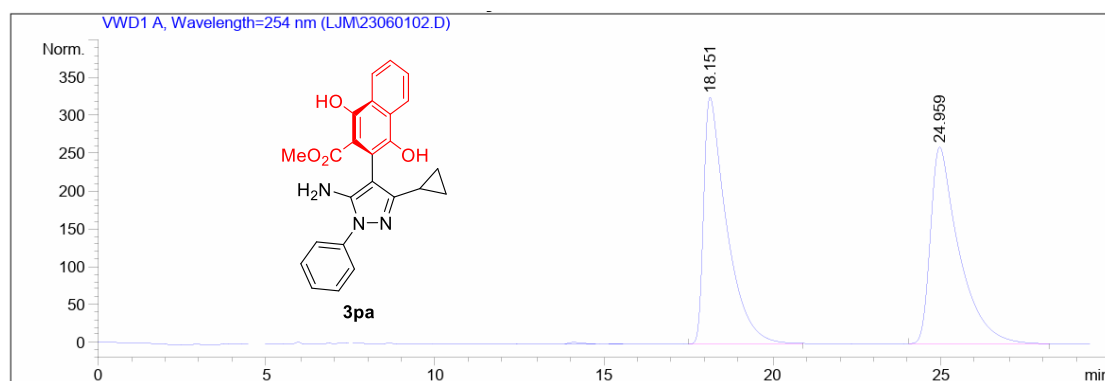

| Peak # | RetTime [min] | Type | Width [min] | Area mAU *s | Height [mAU] | Area %  |
|--------|---------------|------|-------------|-------------|--------------|---------|
| 1      | 18.151        | BB   | 0.6671      | 1.53599e4   | 326.29727    | 50.0600 |
| 2      | 24.959        | BB   | 0.8386      | 1.53231e4   | 260.15469    | 49.9400 |

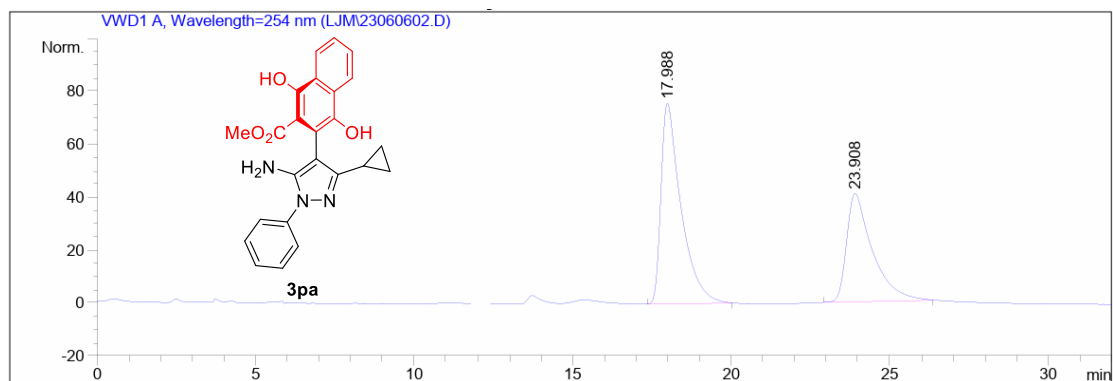

| Peak # | RetTime [min] | Type | Width [min] | Area mAU *s | Height [mAU] | Area %  |
|--------|---------------|------|-------------|-------------|--------------|---------|
| 1      | 17.988        | BB   | 0.6272      | 3312.70630  | 75.67870     | 58.8438 |
| 2      | 23.908        | BB   | 0.8103      | 2316.95435  | 40.84604     | 41.1562 |

### Compound 3qa

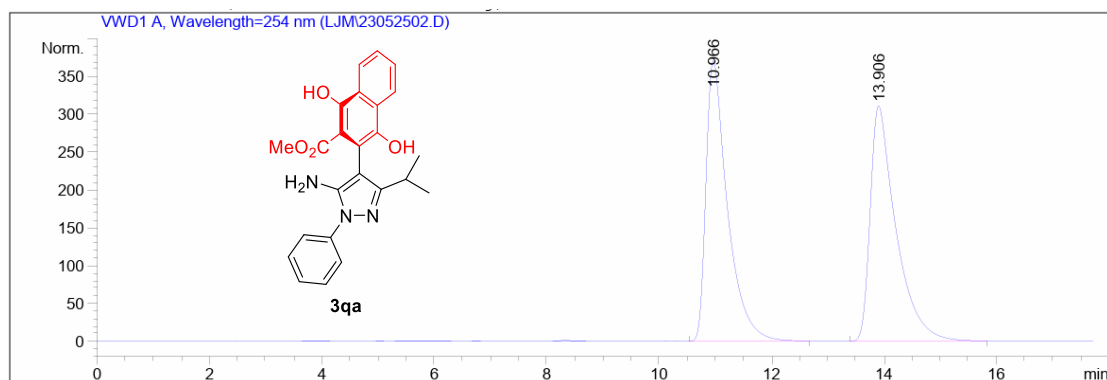

| Peak # | RetTime [min] | Type | Width [min] | Area mAU *s | Height [mAU] | Area %  |
|--------|---------------|------|-------------|-------------|--------------|---------|
| 1      | 10.966        | BB   | 0.3880      | 9845.97852  | 371.28793    | 49.9730 |
| 2      | 13.906        | BB   | 0.4525      | 9856.59961  | 311.18057    | 50.0270 |

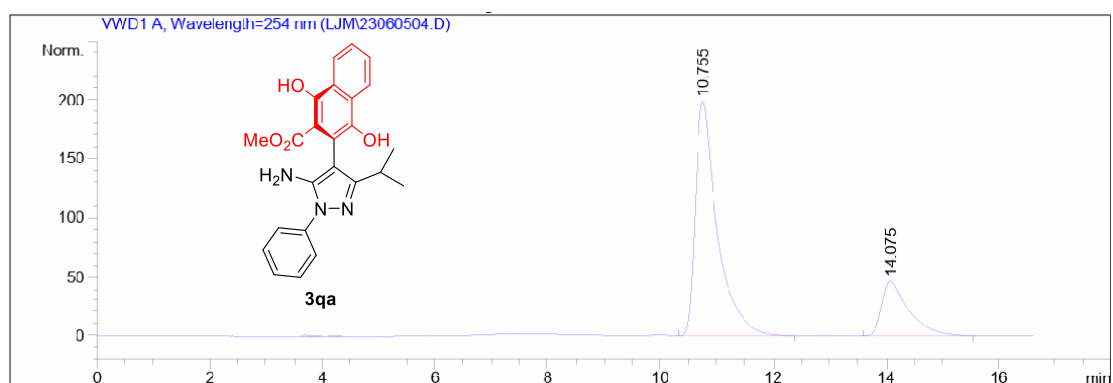

| Peak # | RetTime [min] | Type | Width [min] | Area mAU *s | Height [mAU] | Area %  |
|--------|---------------|------|-------------|-------------|--------------|---------|
| 1      | 10.755        | VB   | 0.3894      | 5311.96729  | 198.49724    | 77.6779 |
| 2      | 14.075        | BB   | 0.4661      | 1526.48621  | 46.48724     | 22.3221 |

### Compound 3ra

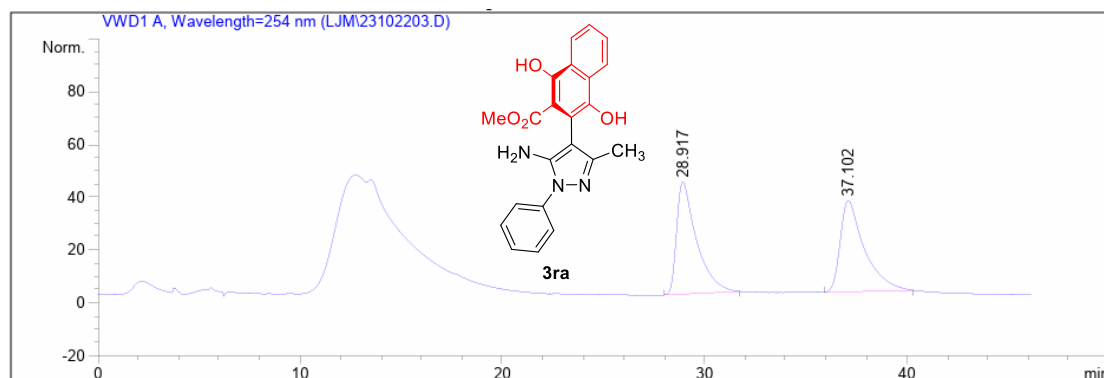

| Peak # | RetTime [min] | Type | Width [min] | Area mAU *s | Height [mAU] | Area %  |
|--------|---------------|------|-------------|-------------|--------------|---------|
| 1      | 28.917        | BB   | 0.9530      | 2915.38232  | 42.50959     | 50.2288 |
| 2      | 37.102        | BB   | 1.1706      | 2888.82153  | 34.60181     | 49.7712 |

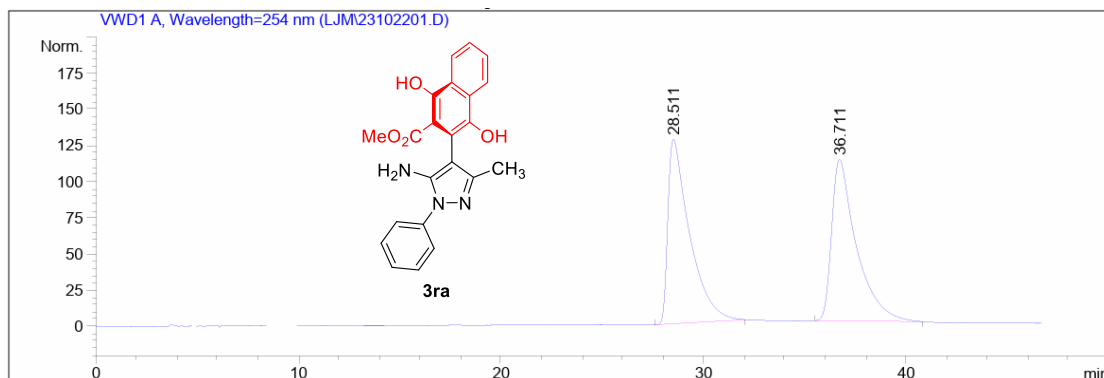

| Peak # | RetTime [min] | Type | Width [min] | Area mAU *s | Height [mAU] | Area %  |
|--------|---------------|------|-------------|-------------|--------------|---------|
| 1      | 28.511        | PB   | 1.0547      | 9494.67285  | 127.57211    | 50.0572 |
| 2      | 36.711        | BB   | 1.1873      | 9472.96387  | 111.54948    | 49.9428 |

### Compound 3sa

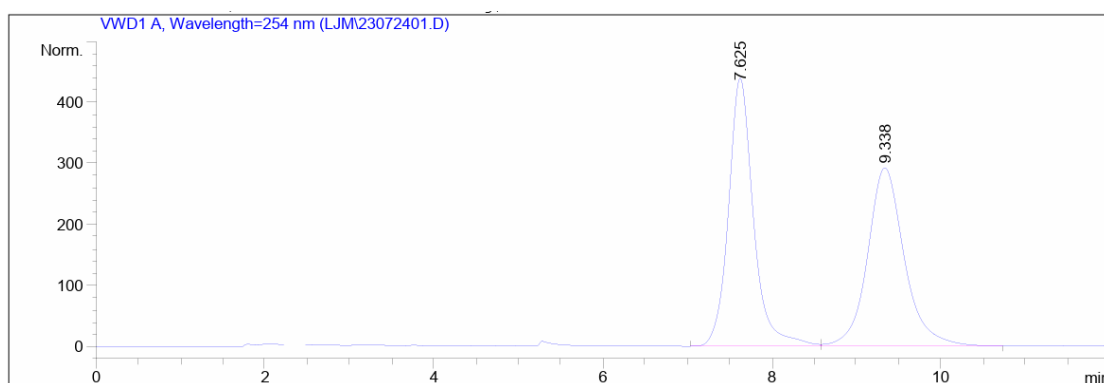

| Peak # | RetTime [min] | Type | Width [min] | Area mAU *s | Height [mAU] | Area %  |
|--------|---------------|------|-------------|-------------|--------------|---------|
| 1      | 7.625         | PV   | 0.3075      | 9026.89160  | 437.84744    | 50.6440 |
| 2      | 9.338         | VB   | 0.4543      | 8797.30664  | 291.30371    | 49.3560 |



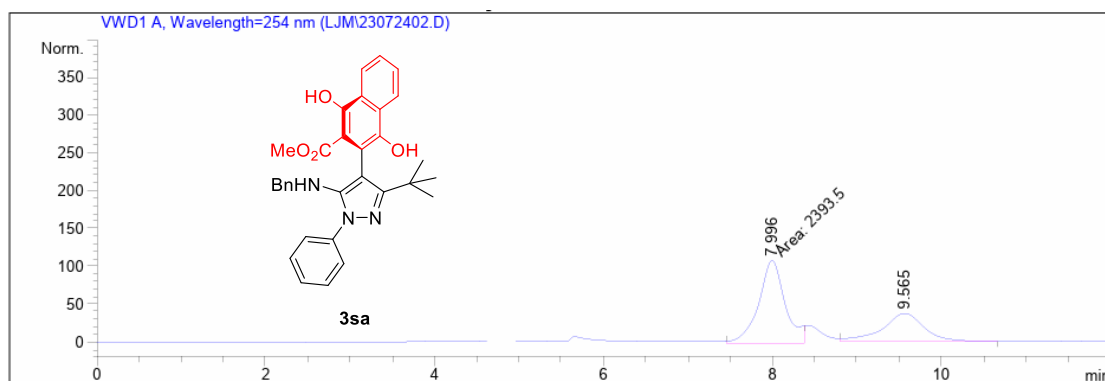

| Peak # | RetTime [min] | Type | Width [min] | Area mAU   | Area *s | Height [mAU] | Area %  |
|--------|---------------|------|-------------|------------|---------|--------------|---------|
| 1      | 7.996         | MM   | 0.3642      | 2393.50049 |         | 109.53661    | 64.7209 |
| 2      | 9.565         | VB   | 0.5071      | 1304.68726 |         | 37.43550     | 35.2791 |

### Compound 3ab

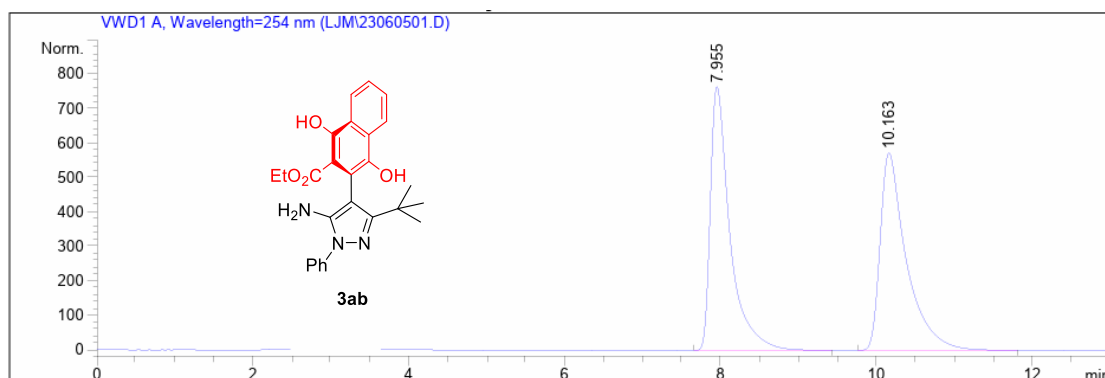

| Peak # | RetTime [min] | Type | Width [min] | Area mAU  | Area *s | Height [mAU] | Area %  |
|--------|---------------|------|-------------|-----------|---------|--------------|---------|
| 1      | 7.955         | BB   | 0.2580      | 1.32643e4 |         | 763.48193    | 49.9153 |
| 2      | 10.163        | PB   | 0.3355      | 1.33093e4 |         | 572.03174    | 50.0847 |

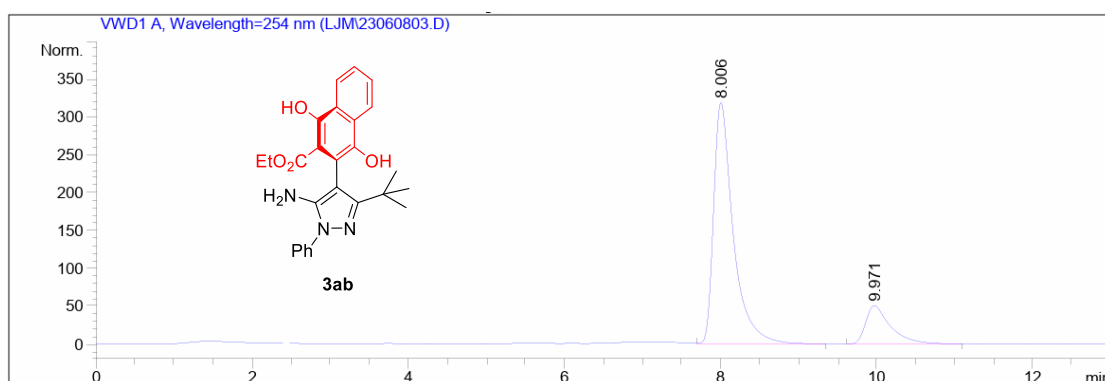

| Peak # | RetTime [min] | Type | Width [min] | Area mAU   | Area *s | Height [mAU] | Area %  |
|--------|---------------|------|-------------|------------|---------|--------------|---------|
| 1      | 8.006         | VB   | 0.2602      | 5548.29639 |         | 318.20441    | 83.2331 |
| 2      | 9.971         | PB   | 0.3213      | 1117.68066 |         | 50.40136     | 16.7669 |

## Compound 3ac

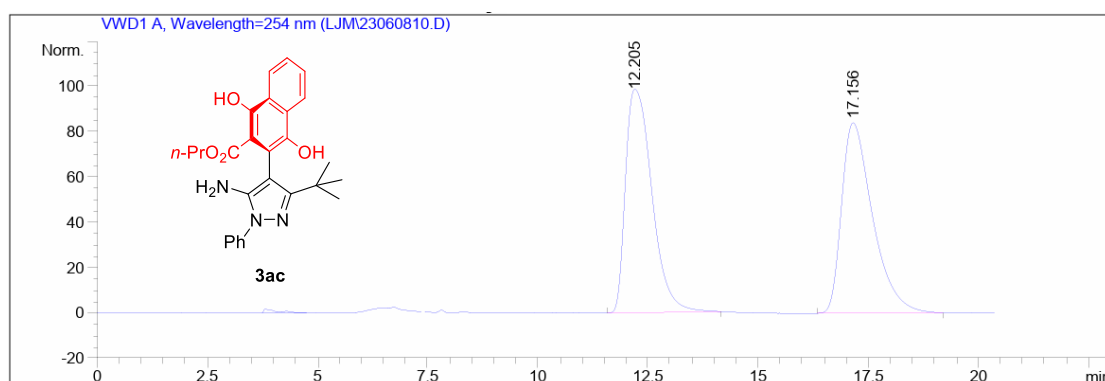

| Peak # | RetTime [min] | Type | Width [min] | Area mAU *s | Height [mAU] | Area %  |
|--------|---------------|------|-------------|-------------|--------------|---------|
| 1      | 12.205        | PB   | 0.6615      | 4122.77441  | 98.51266     | 50.0468 |
| 2      | 17.156        | BB   | 0.7463      | 4115.06152  | 83.99258     | 49.9532 |

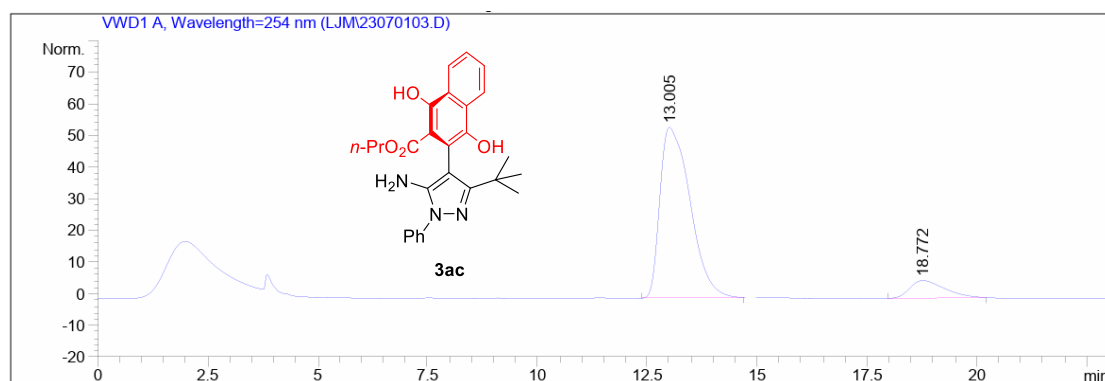

| Peak # | RetTime [min] | Type | Width [min] | Area mAU *s | Height [mAU] | Area %  |
|--------|---------------|------|-------------|-------------|--------------|---------|
| 1      | 13.005        | BB   | 0.6634      | 2569.74731  | 53.81838     | 89.4147 |
| 2      | 18.772        | BB   | 0.7462      | 304.21674   | 5.53345      | 10.5853 |

## Compound 3ad

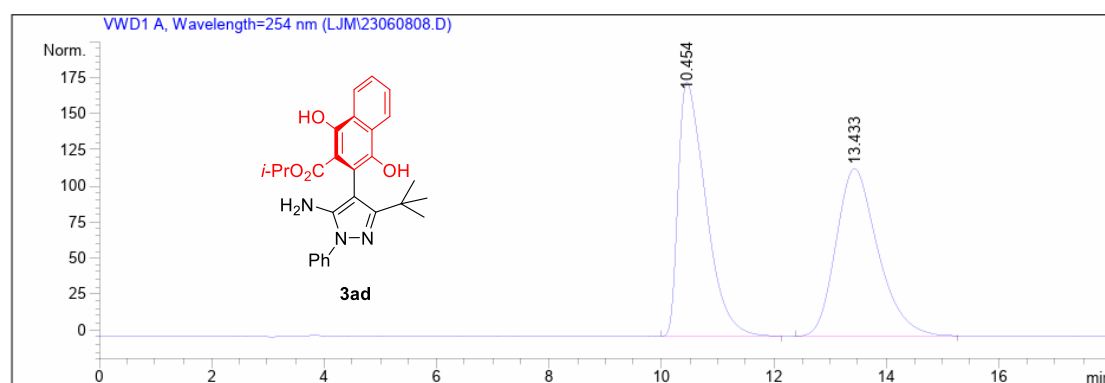

| Peak # | RetTime [min] | Type | Width [min] | Area mAU *s | Height [mAU] | Area %  |
|--------|---------------|------|-------------|-------------|--------------|---------|
| 1      | 10.454        | BB   | 0.5450      | 5970.06982  | 175.66077    | 49.9479 |
| 2      | 13.433        | PB   | 0.7840      | 5982.51758  | 115.93729    | 50.0521 |

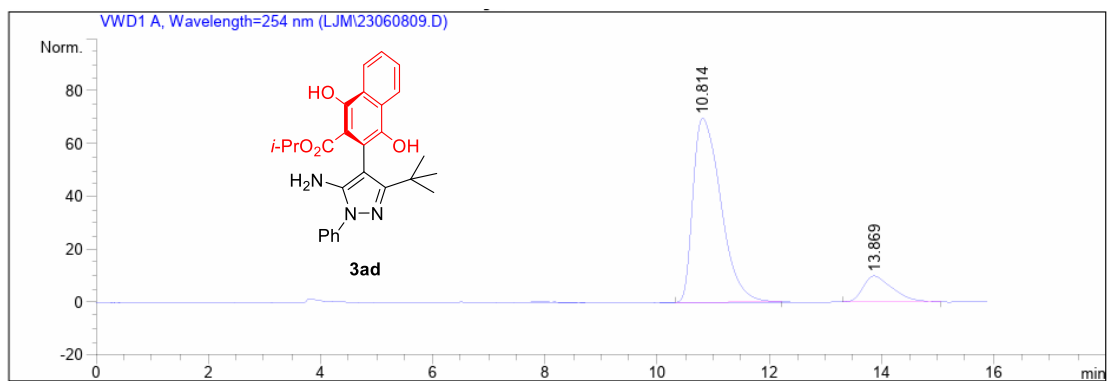

| Peak # | RetTime [min] | Type | Width [min] | Area mAU *s | Height [mAU] | Area %  |
|--------|---------------|------|-------------|-------------|--------------|---------|
| 1      | 10.814        | BB   | 0.5506      | 2402.86743  | 69.71330     | 86.9466 |
| 2      | 13.869        | BB   | 0.5306      | 360.74530   | 9.88536      | 13.0534 |

### Compound 3ae

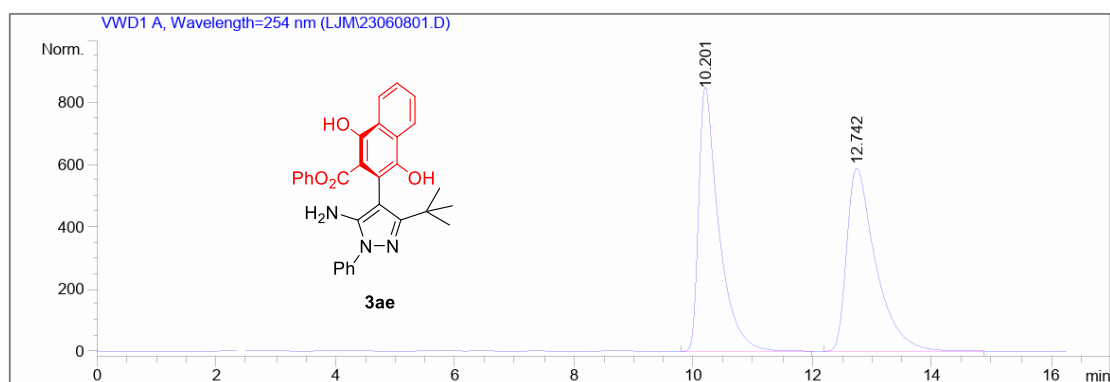

| Peak # | RetTime [min] | Type | Width [min] | Area mAU *s | Height [mAU] | Area %  |
|--------|---------------|------|-------------|-------------|--------------|---------|
| 1      | 10.201        | BB   | 0.3357      | 1.97630e4   | 848.84637    | 49.9922 |
| 2      | 12.742        | PB   | 0.4959      | 1.97692e4   | 587.57397    | 50.0078 |

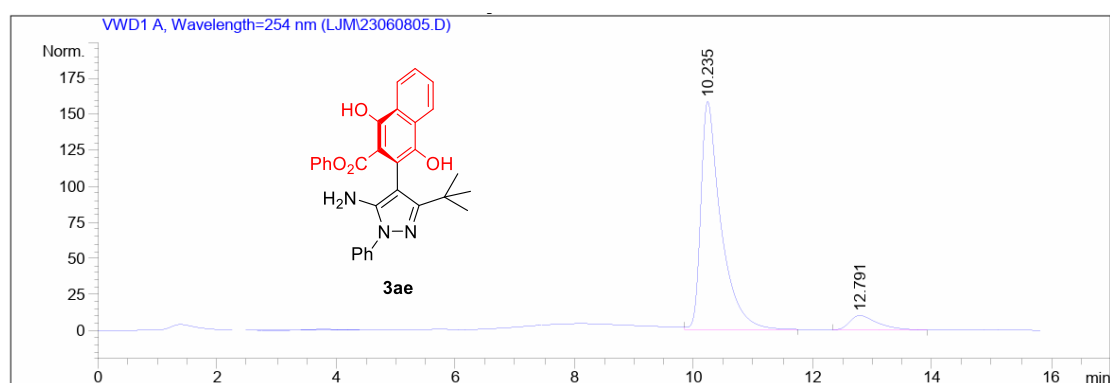

| Peak # | RetTime [min] | Type | Width [min] | Area mAU *s | Height [mAU] | Area %  |
|--------|---------------|------|-------------|-------------|--------------|---------|
| 1      | 10.235        | VB   | 0.3358      | 3705.90820  | 158.25160    | 91.9957 |
| 2      | 12.791        | PB   | 0.4780      | 322.44257   | 9.92463      | 8.0043  |

## Compound 3af

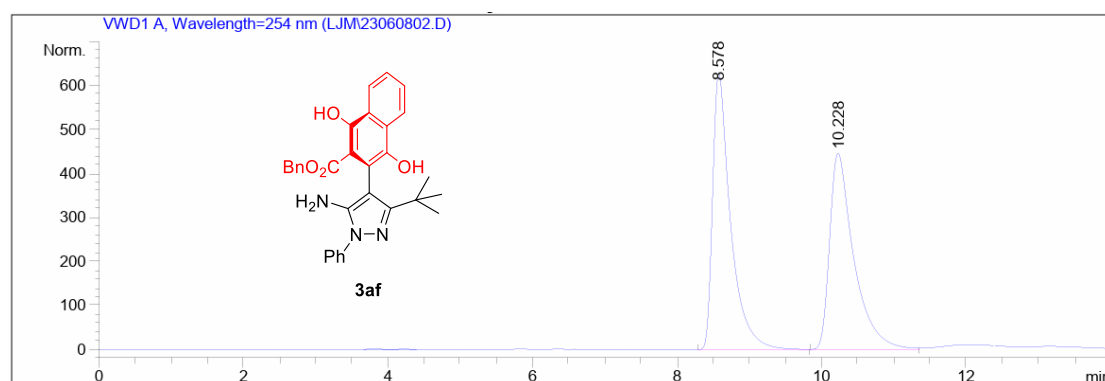

| Peak # | RetTime [min] | Type | Width [min] | Area mAU  | Area *s | Height [mAU] | Area %  |
|--------|---------------|------|-------------|-----------|---------|--------------|---------|
| 1      | 8.578         | VB   | 0.2519      | 1.07886e4 |         | 626.43762    | 51.0825 |
| 2      | 10.228        | BV   | 0.3377      | 1.03313e4 |         | 445.28378    | 48.9175 |

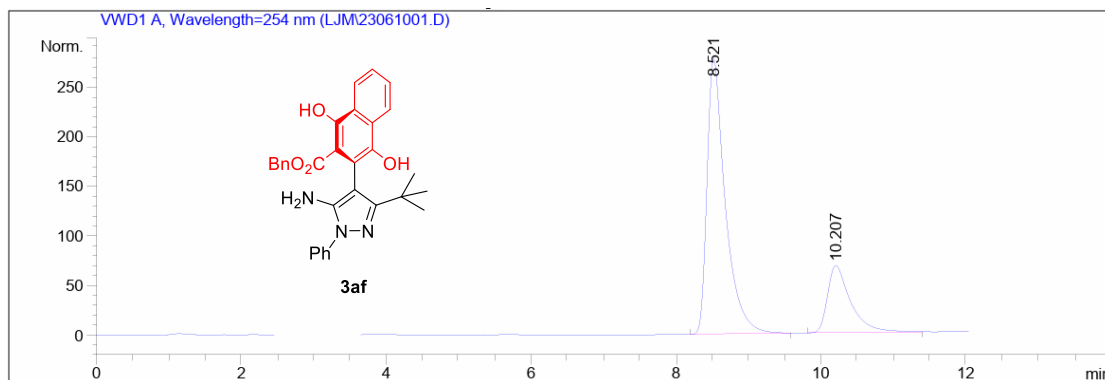

| Peak # | RetTime [min] | Type | Width [min] | Area mAU   | Area *s | Height [mAU] | Area %  |
|--------|---------------|------|-------------|------------|---------|--------------|---------|
| 1      | 8.521         | VB   | 0.2574      | 4829.89893 |         | 276.92062    | 76.5379 |
| 2      | 10.207        | PB   | 0.3216      | 1480.56946 |         | 67.45082     | 23.4621 |

## Compound 4

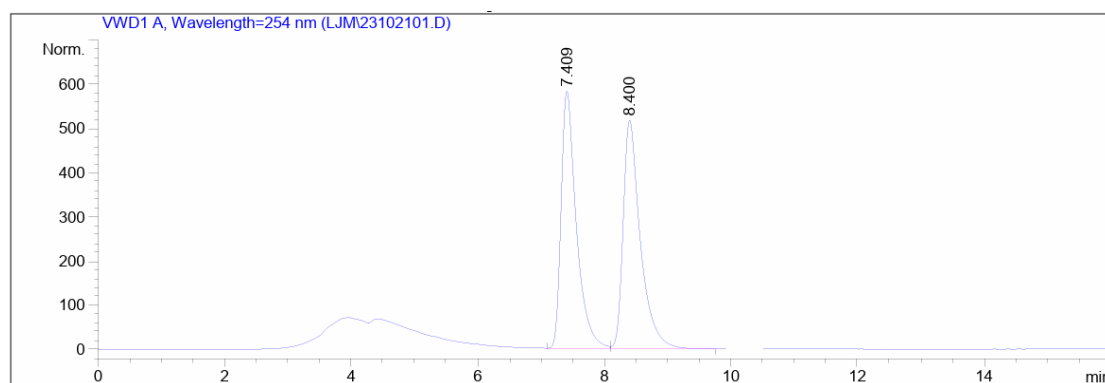

| Peak # | RetTime [min] | Type | Width [min] | Area mAU   | Area *s | Height [mAU] | Area %  |
|--------|---------------|------|-------------|------------|---------|--------------|---------|
| 1      | 7.409         | VV   | 0.2465      | 9783.51563 |         | 583.60919    | 49.9251 |
| 2      | 8.400         | VB   | 0.2780      | 9812.86133 |         | 517.62292    | 50.0749 |

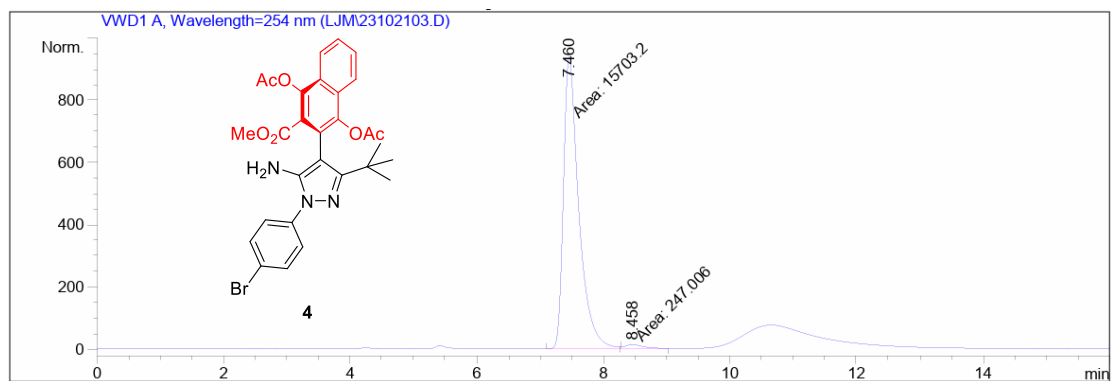

| Peak # | RetTime [min] | Type | Width [min] | Area mAU  | *s | Height [mAU] | Area %  |
|--------|---------------|------|-------------|-----------|----|--------------|---------|
| 1      | 7.460         | MM   | 0.2791      | 1.57032e4 |    | 937.85052    | 98.4514 |
| 2      | 8.458         | MM   | 0.3153      | 247.00552 |    | 13.05557     | 1.5486  |

### Compound 5

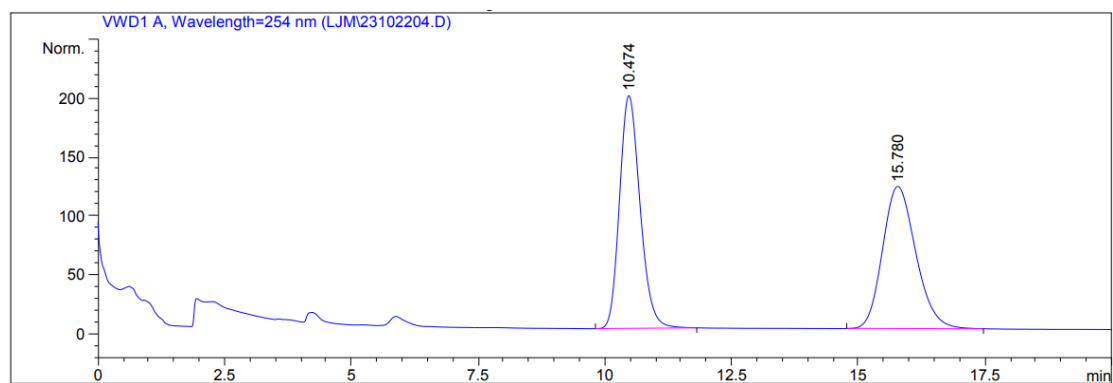

| Peak # | RetTime [min] | Type | Width [min] | Area mAU   | *s | Height [mAU] | Area %  |
|--------|---------------|------|-------------|------------|----|--------------|---------|
| 1      | 10.474        | PB   | 0.4347      | 5561.59863 |    | 197.58485    | 50.1911 |
| 2      | 15.780        | BB   | 0.7124      | 5519.24268 |    | 120.74728    | 49.8089 |

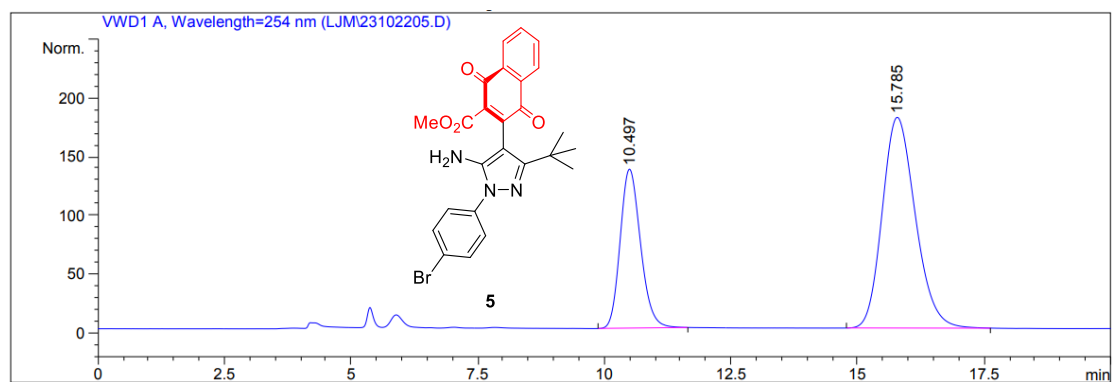

| Peak # | RetTime [min] | Type | Width [min] | Area mAU   | *s | Height [mAU] | Area %  |
|--------|---------------|------|-------------|------------|----|--------------|---------|
| 1      | 10.497        | PB   | 0.4345      | 3789.64478 |    | 135.32426    | 31.7146 |
| 2      | 15.785        | BB   | 0.7025      | 8159.56592 |    | 179.36205    | 68.2854 |

## 6. References

1. M. Bartoszek, M. Beller, J. Deutsch, M. Klawonn, A. Köckritz, N. Nemati and A. Pews-Davtyan, *Tetrahedron*, 2008, **64**, 1316-1322.
2. D. S. Huang, E. V. LeBlanc, T. Shekhar-Guturja, N. Robbins, D. J. Krysan, J. Pizarro, L. Whitesell, L. E. Cowen and L. E. Brown, *J. Med. Chem.*, 2019, **63**, 2139-2180.
3. R. Abonia, J. Castillo, B. Insuasty, J. Quiroga, M. Nogueras and J. Cobo, *Eur. J. Org. Chem.*, 2010, 6454-6463.
4. M. A. Brimble, C. Burgess, R. Halim, M. Petersson and J. Ray, *Tetrahedron*, 2004, **60**, 5751-5758.

## 7. NMR spectra for compounds

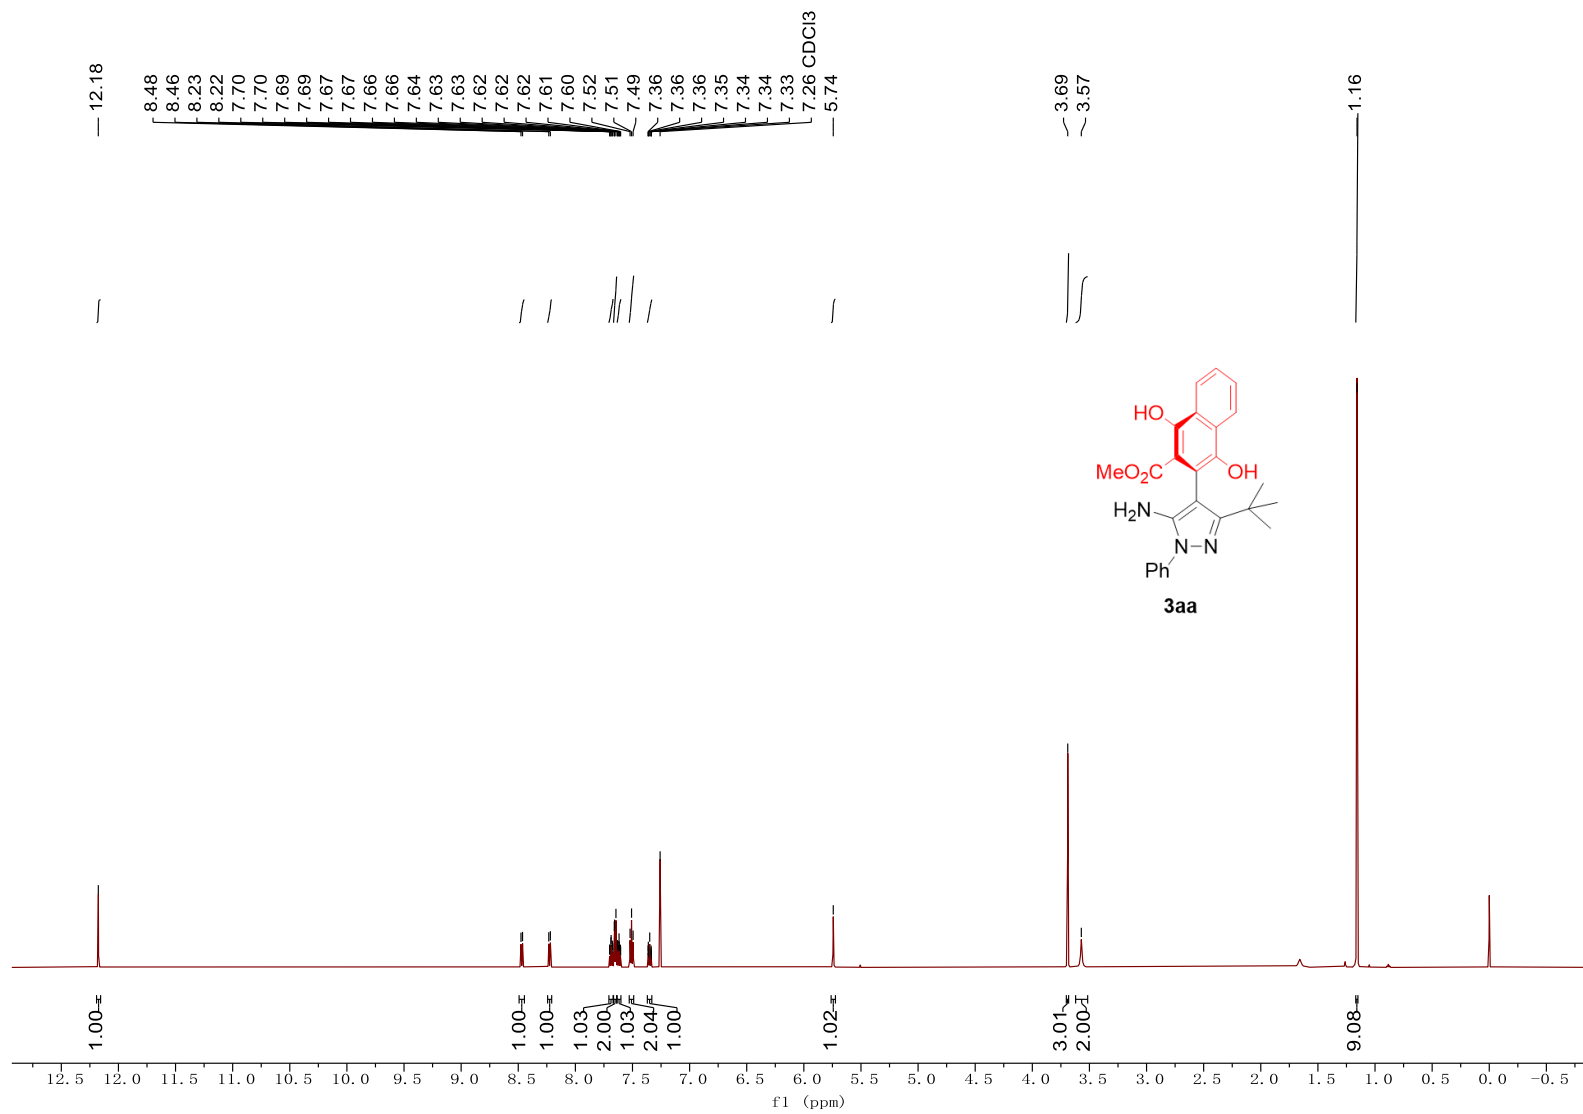

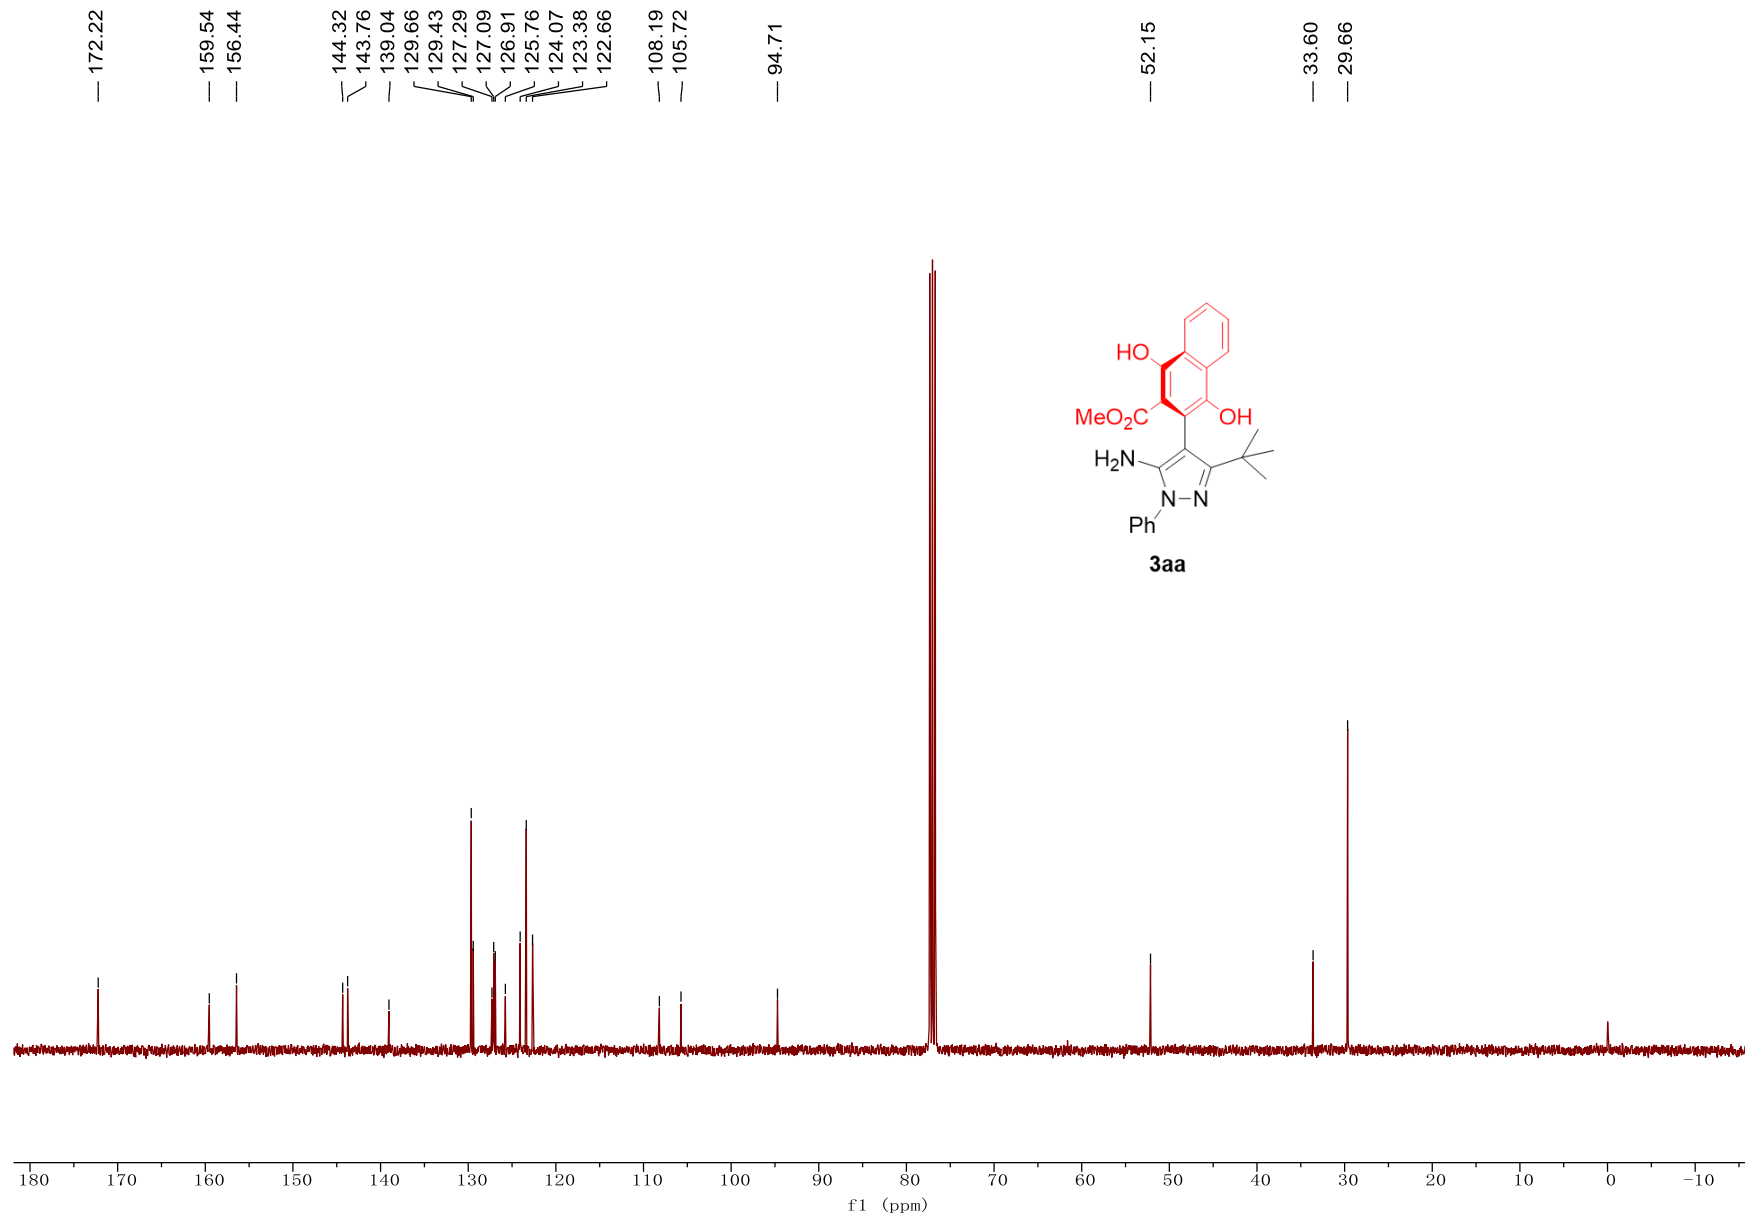



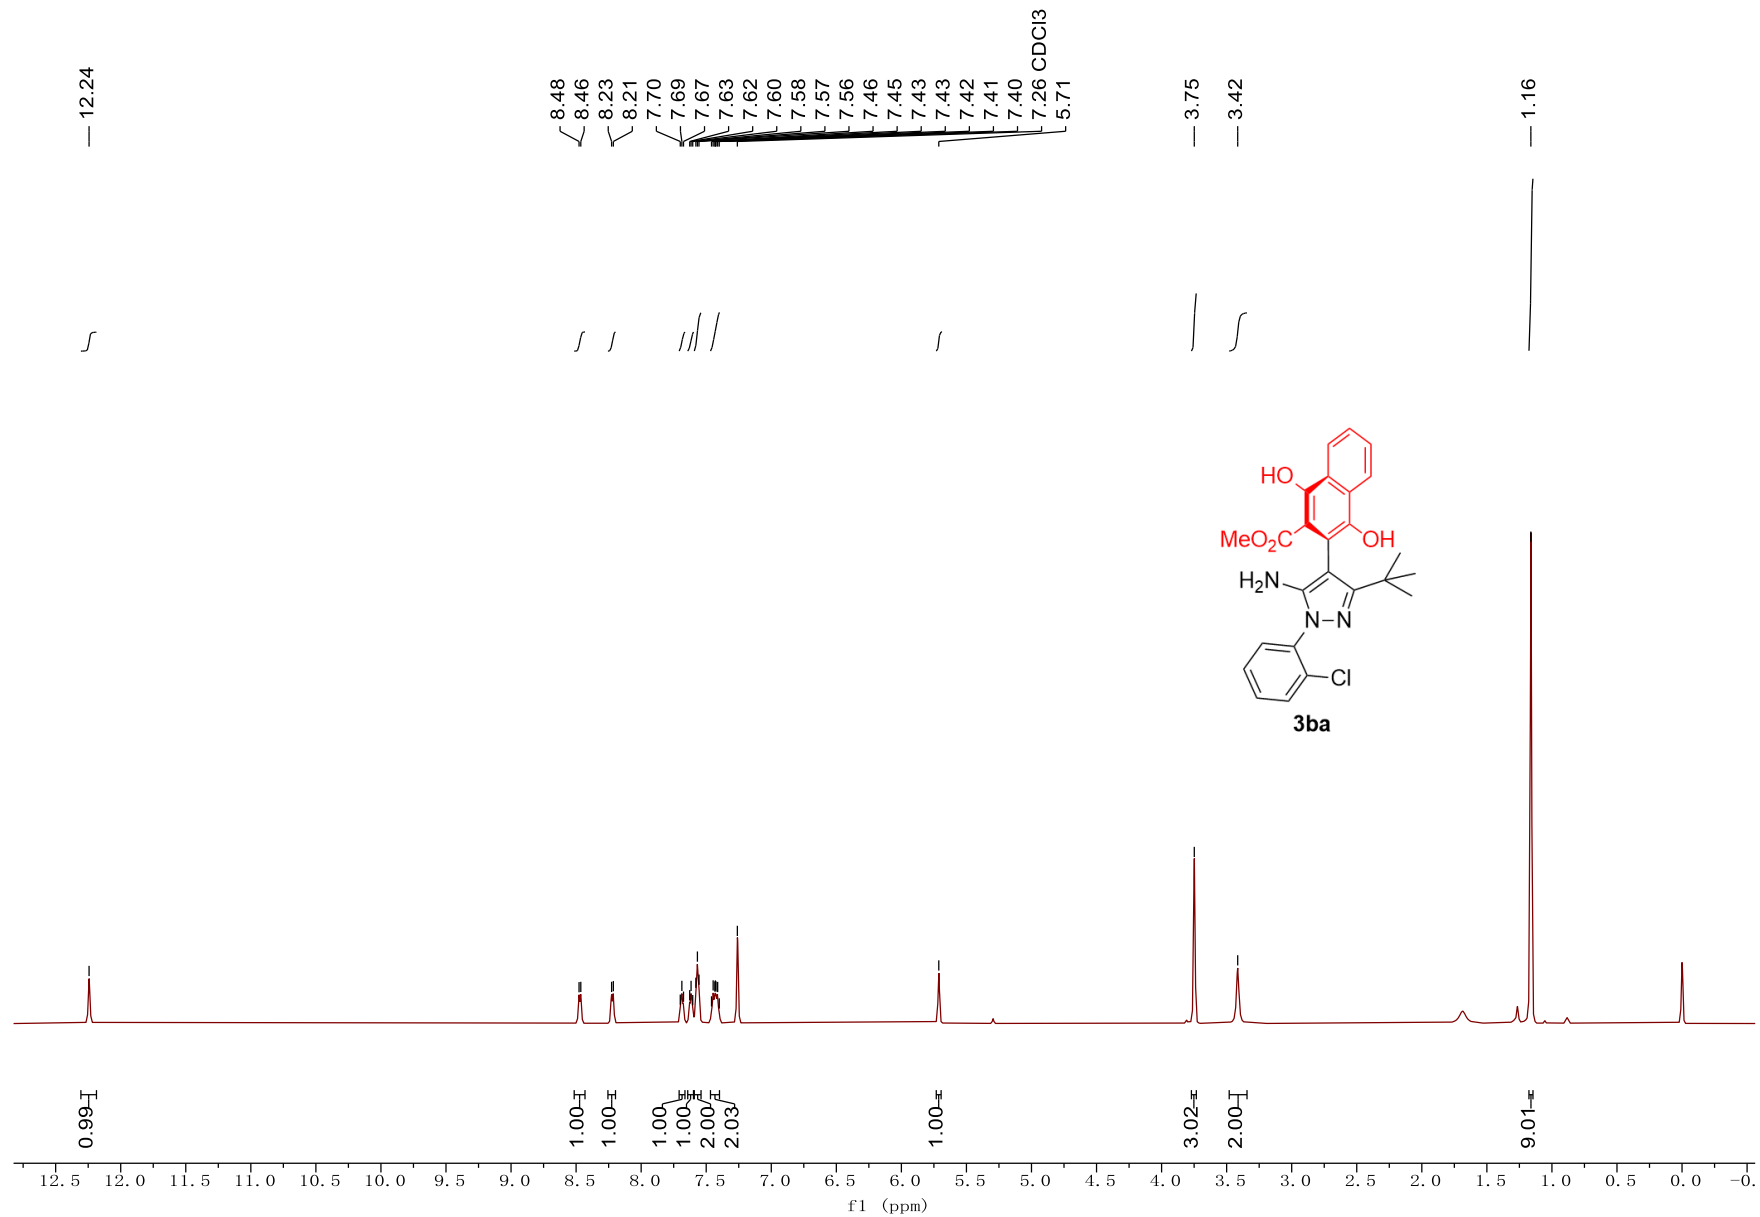

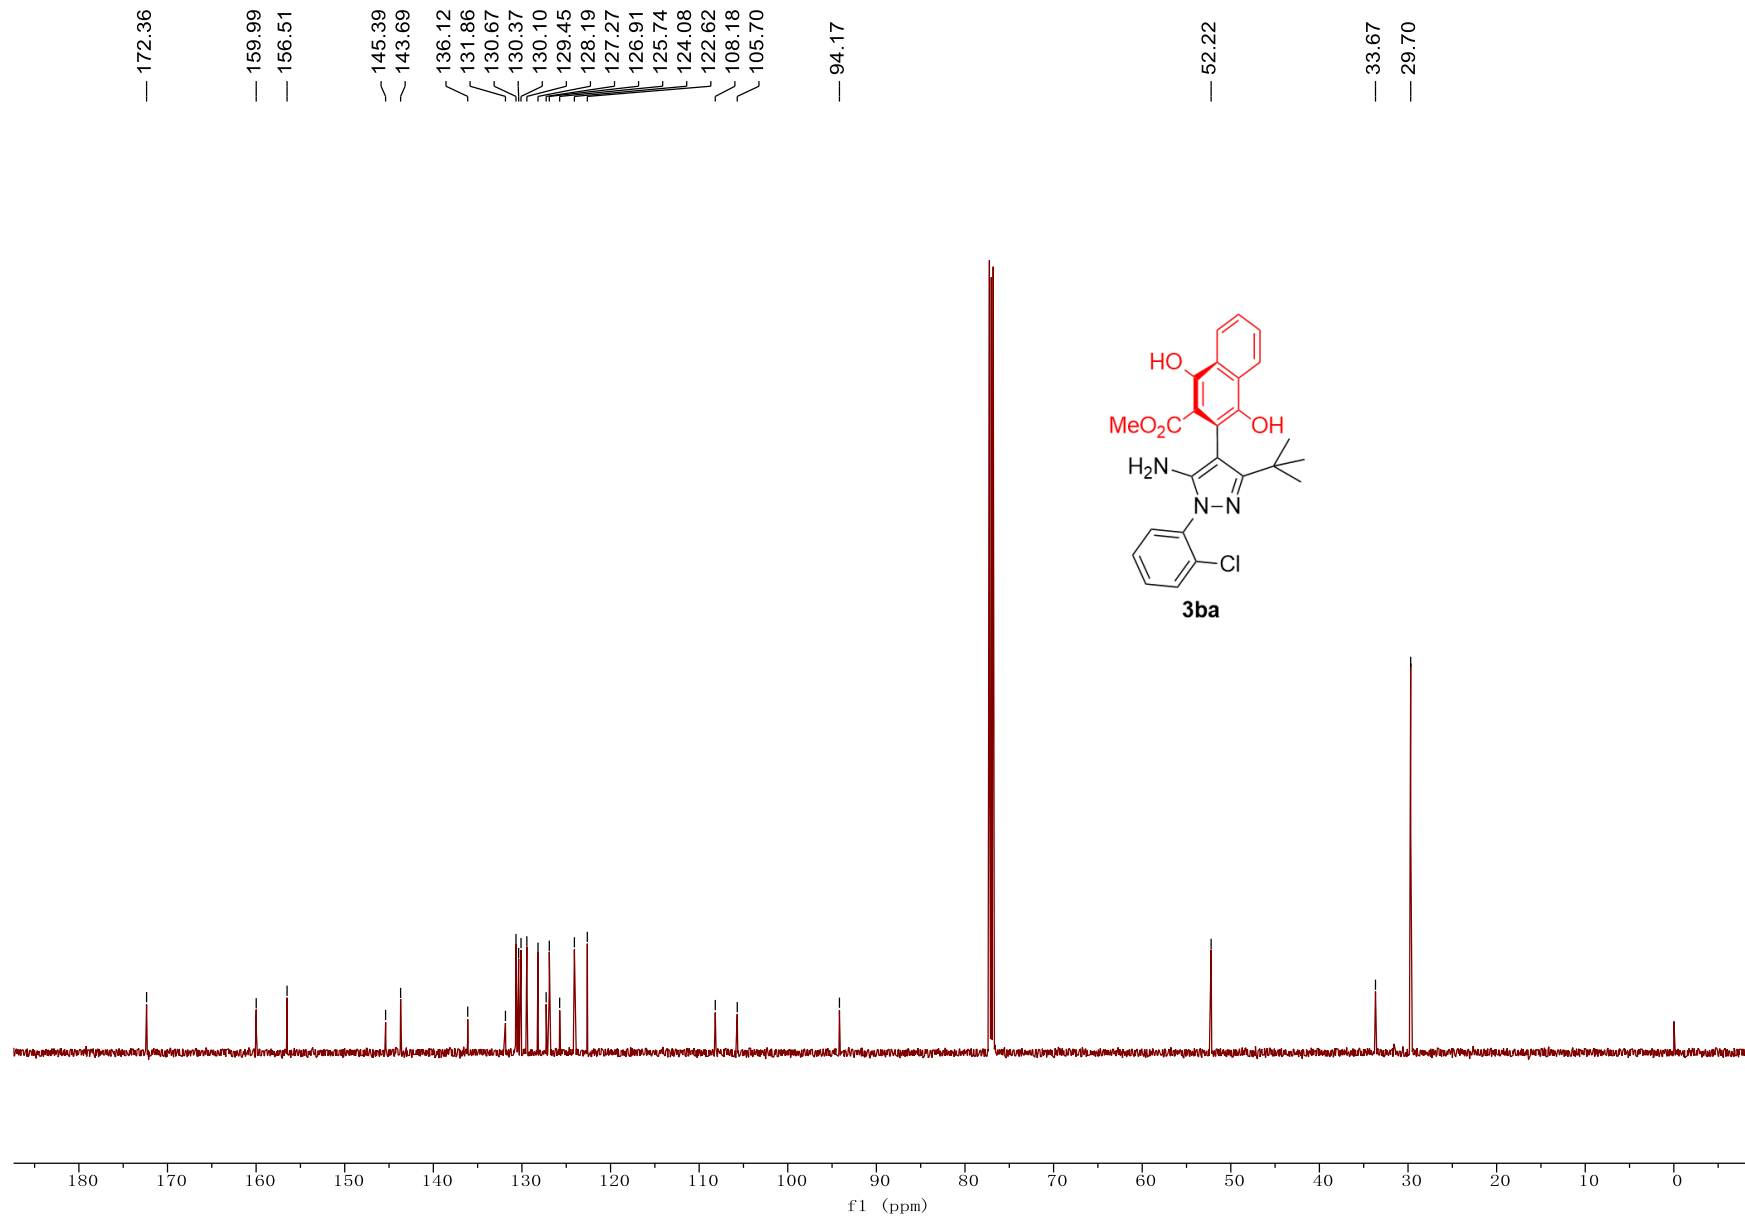

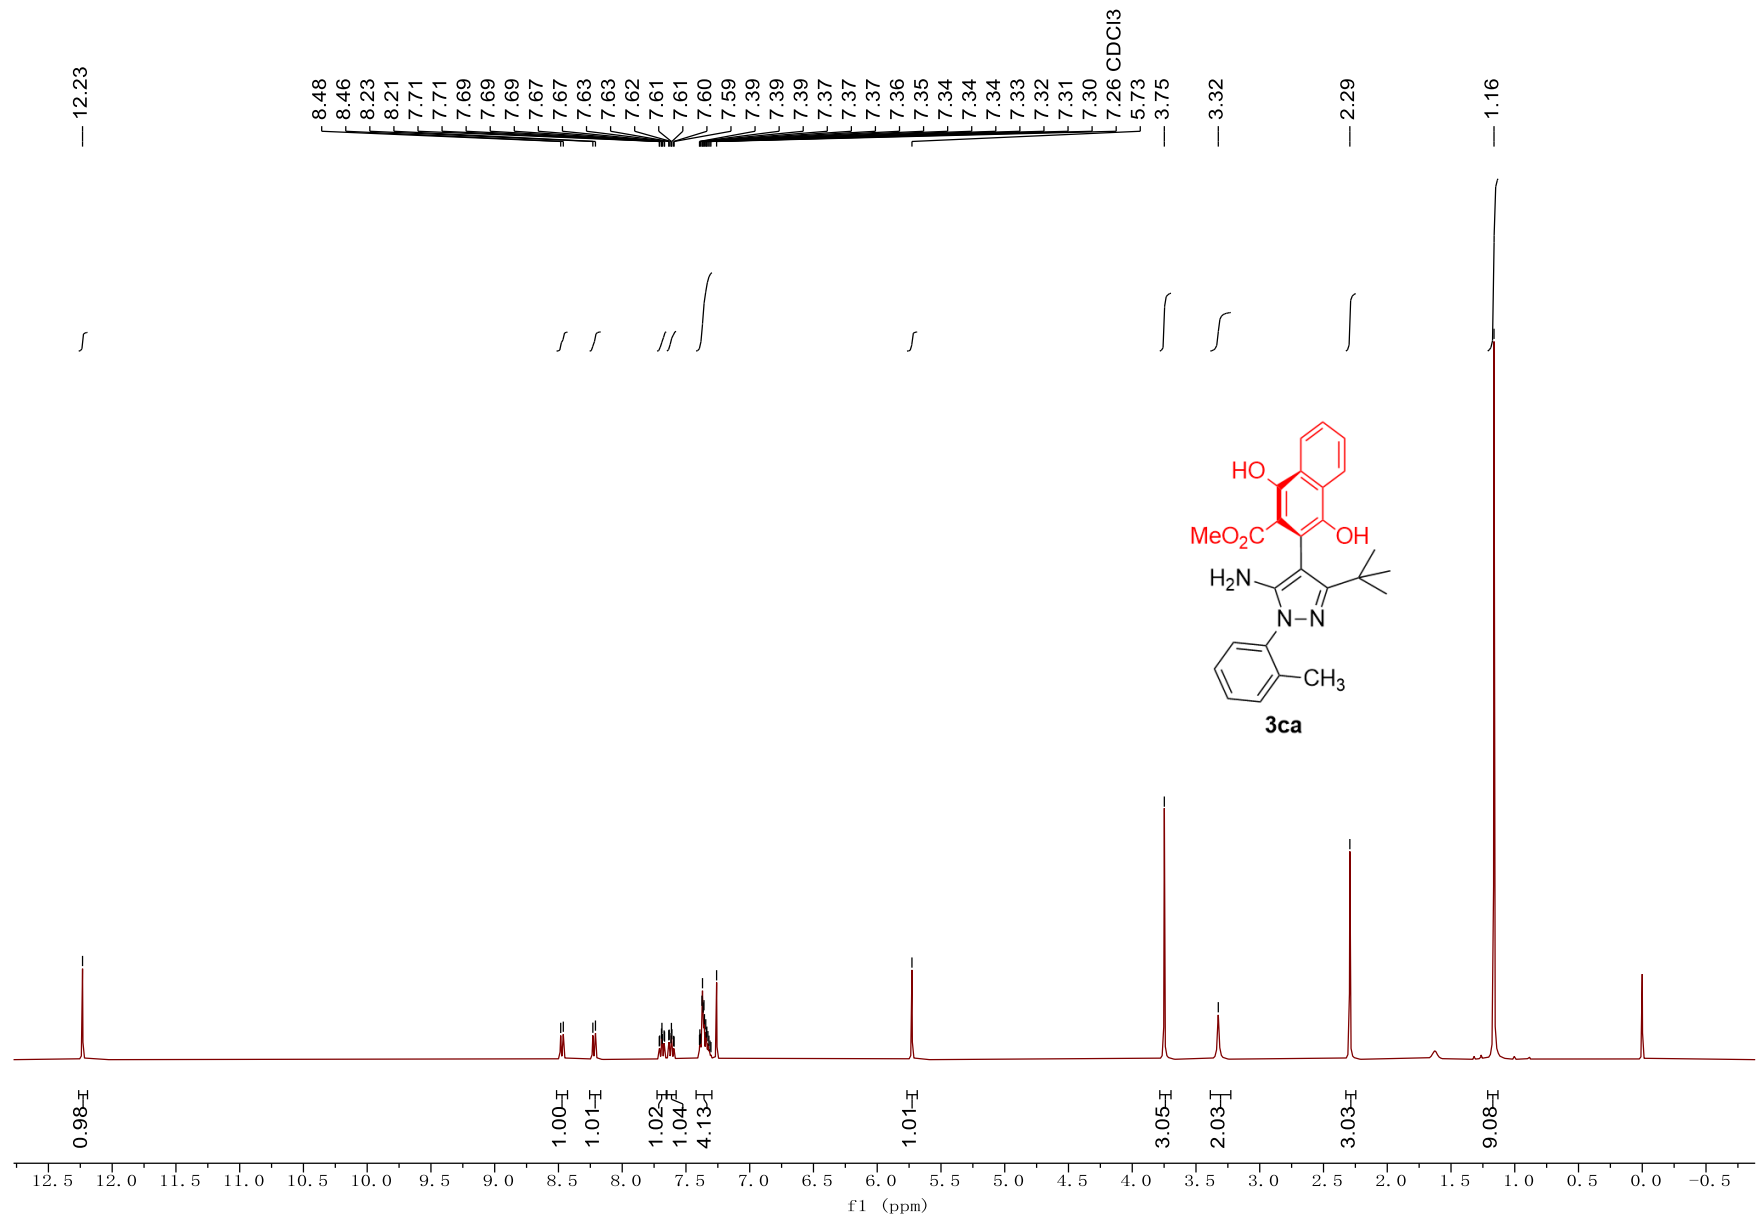

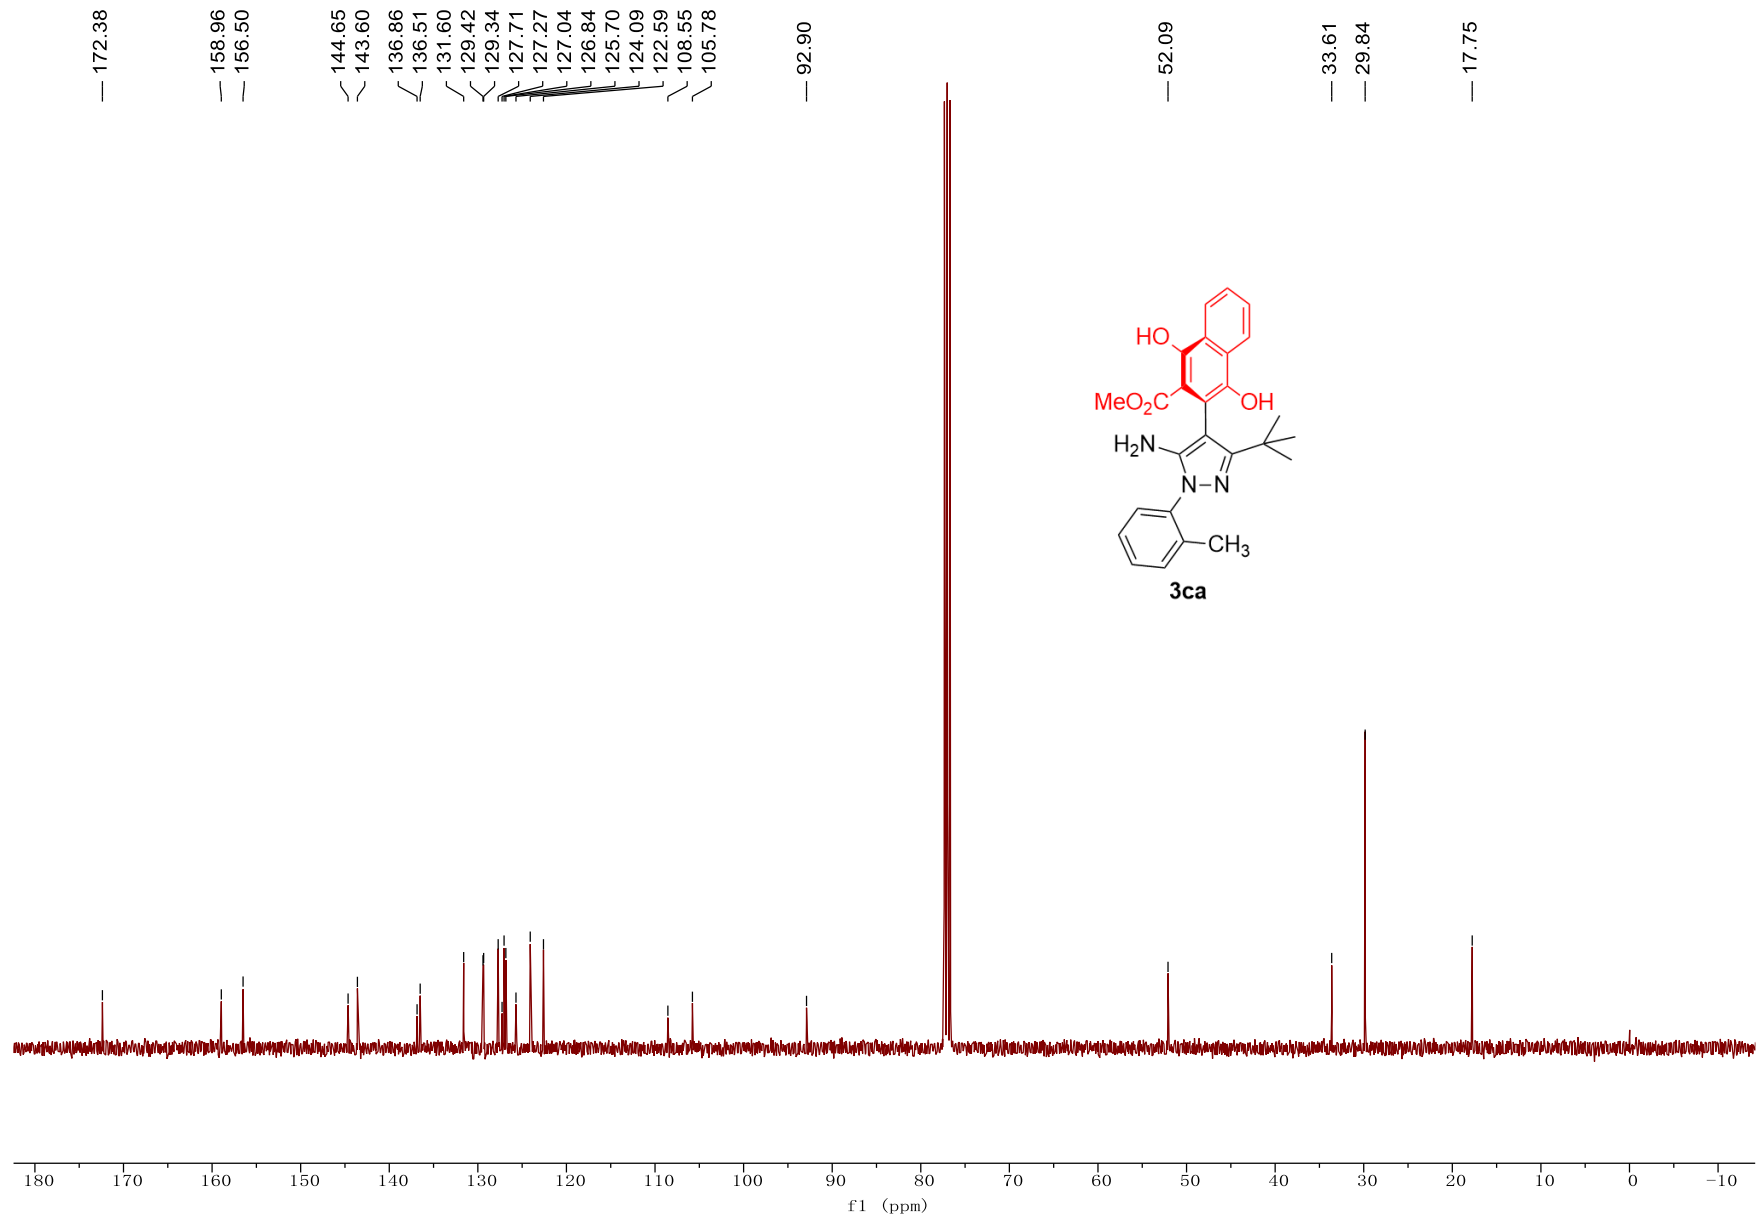

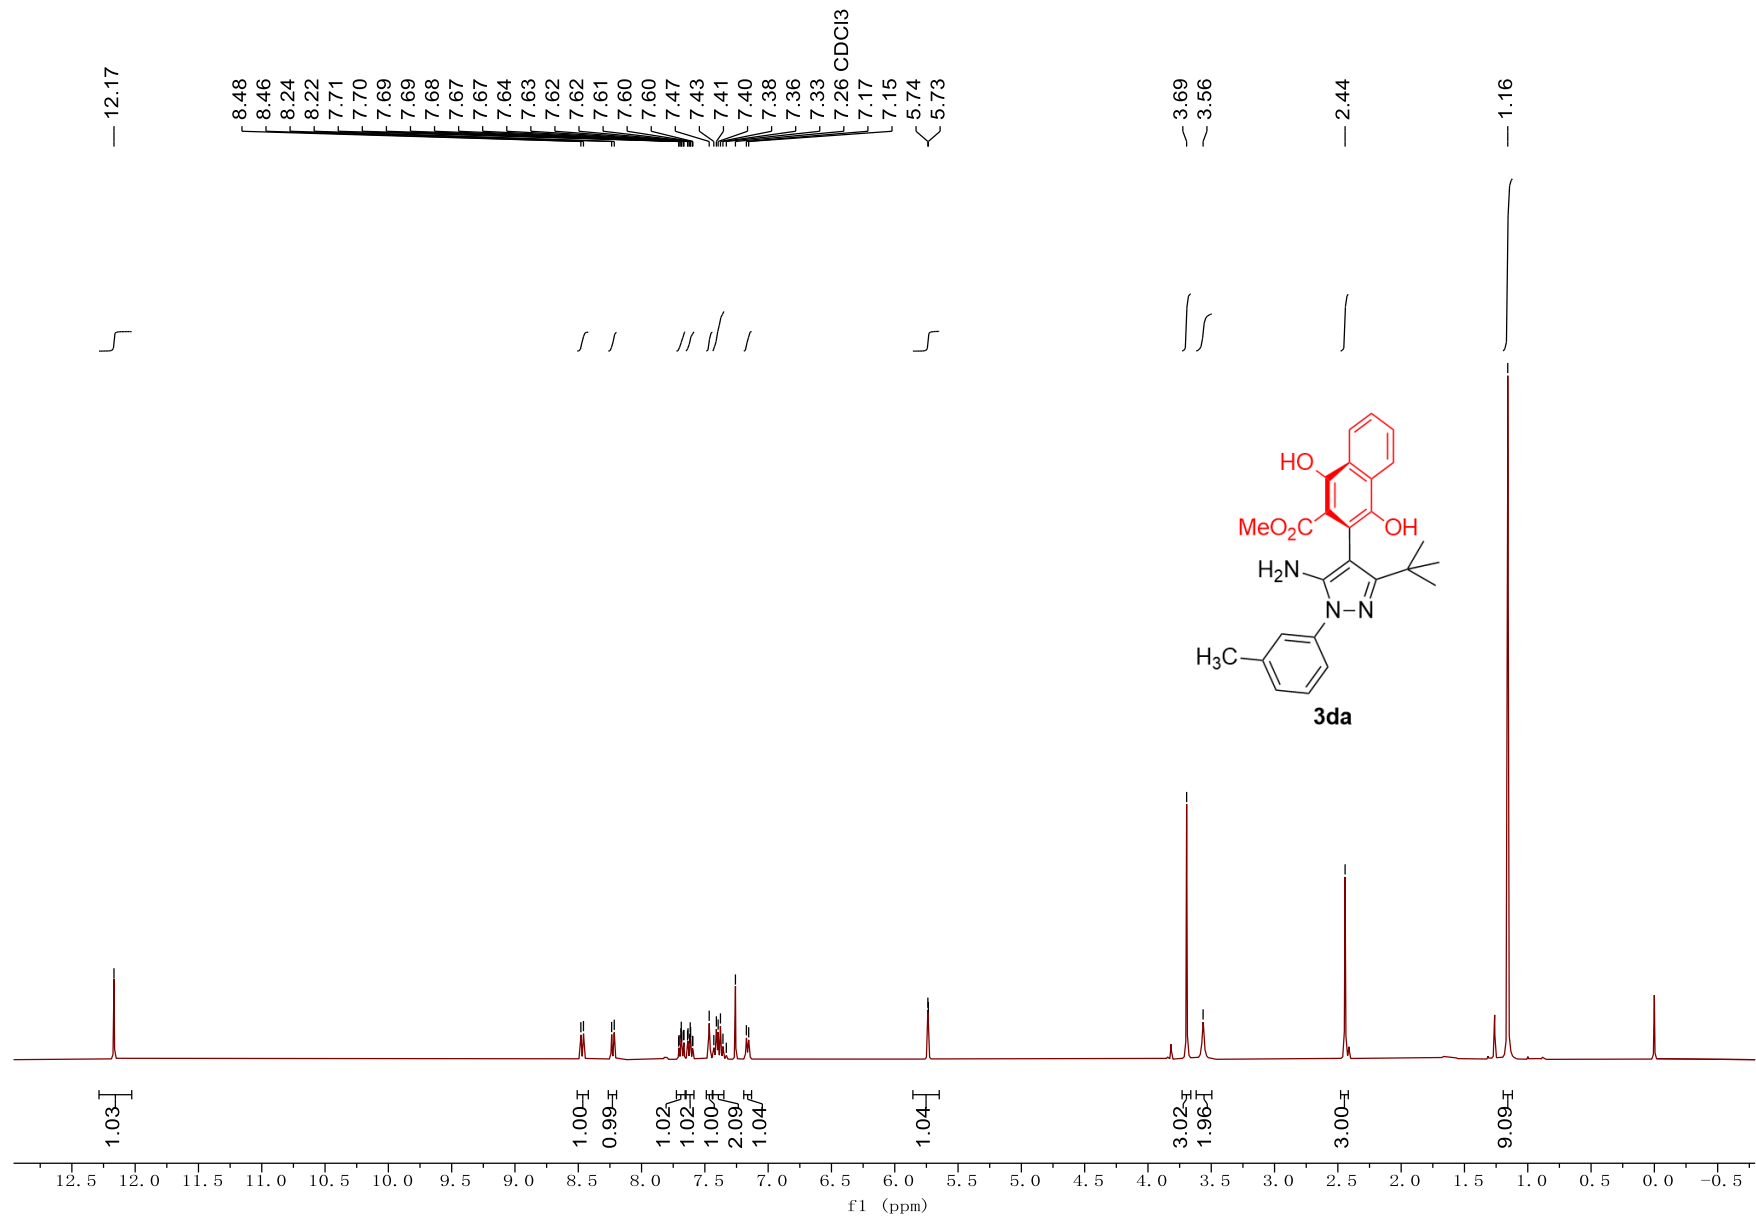

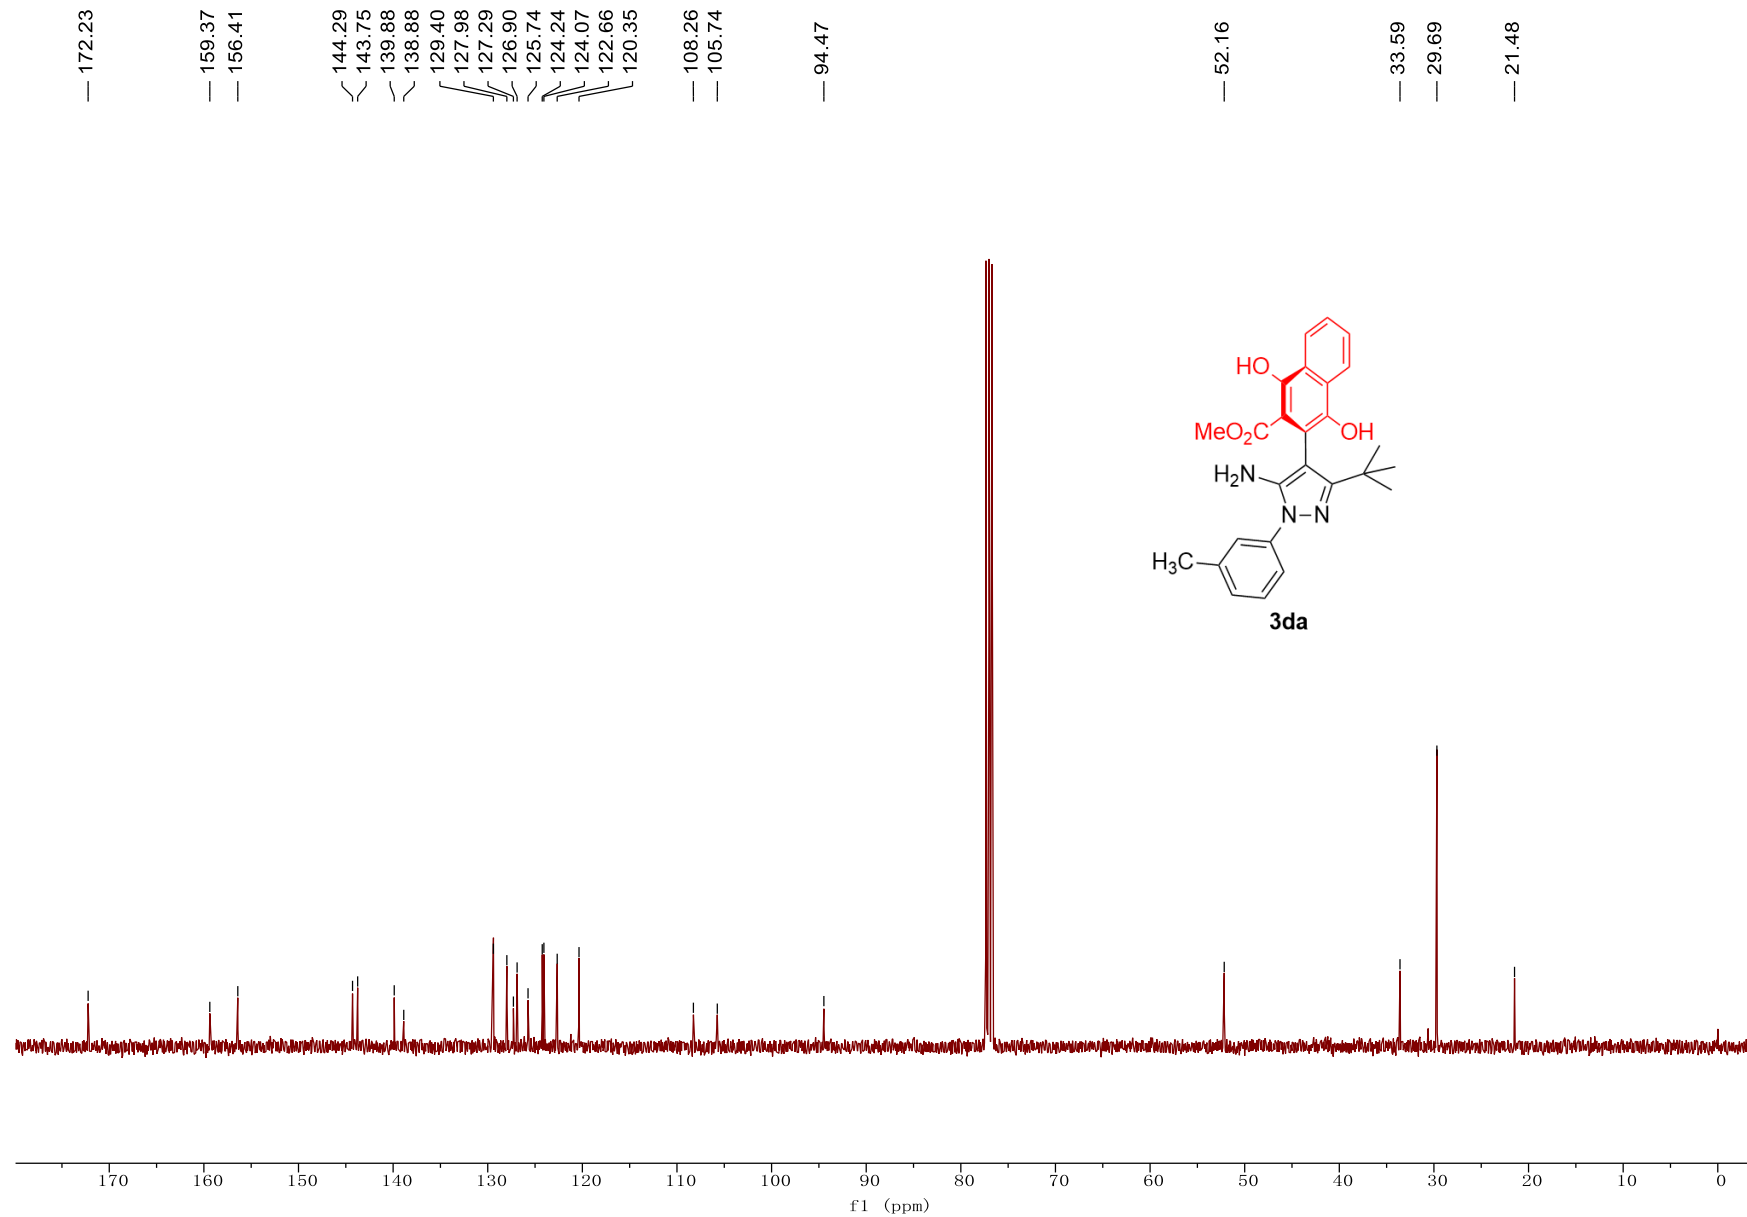

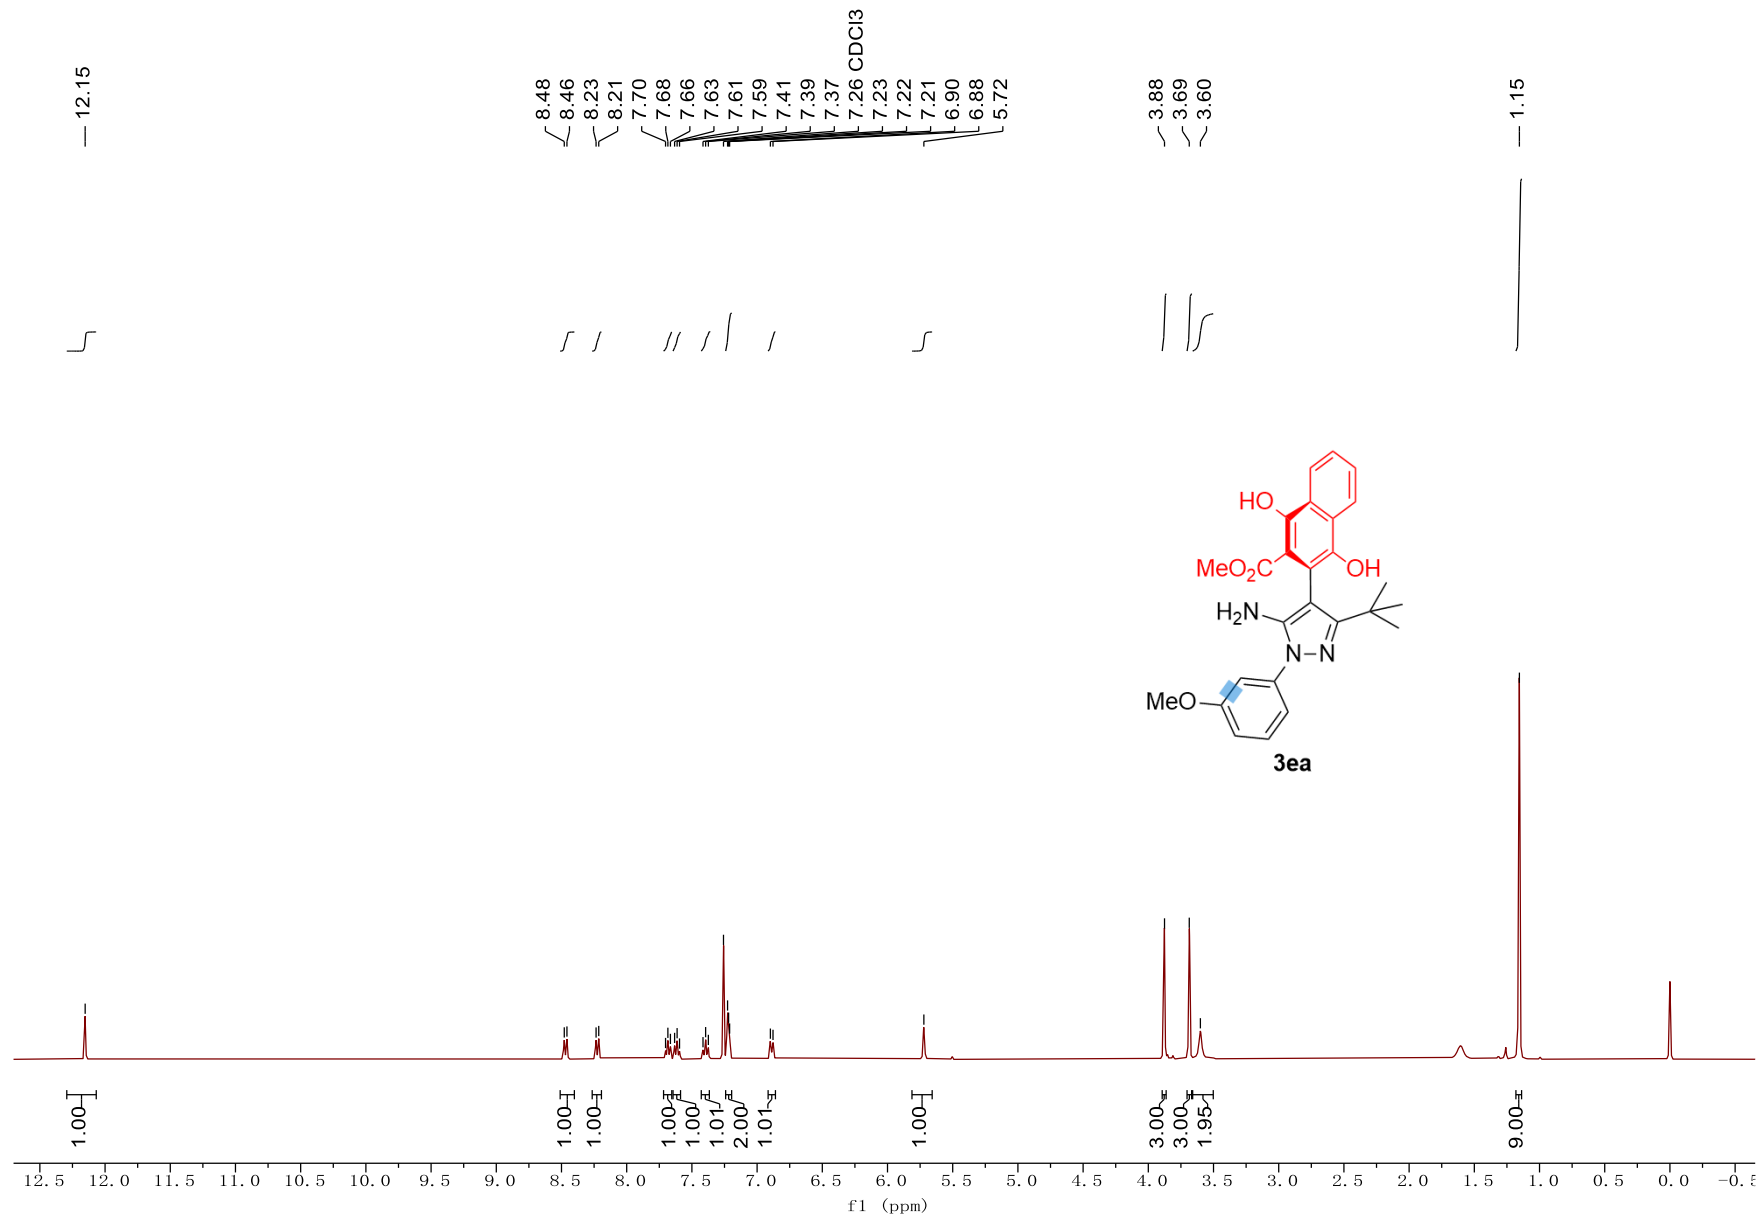

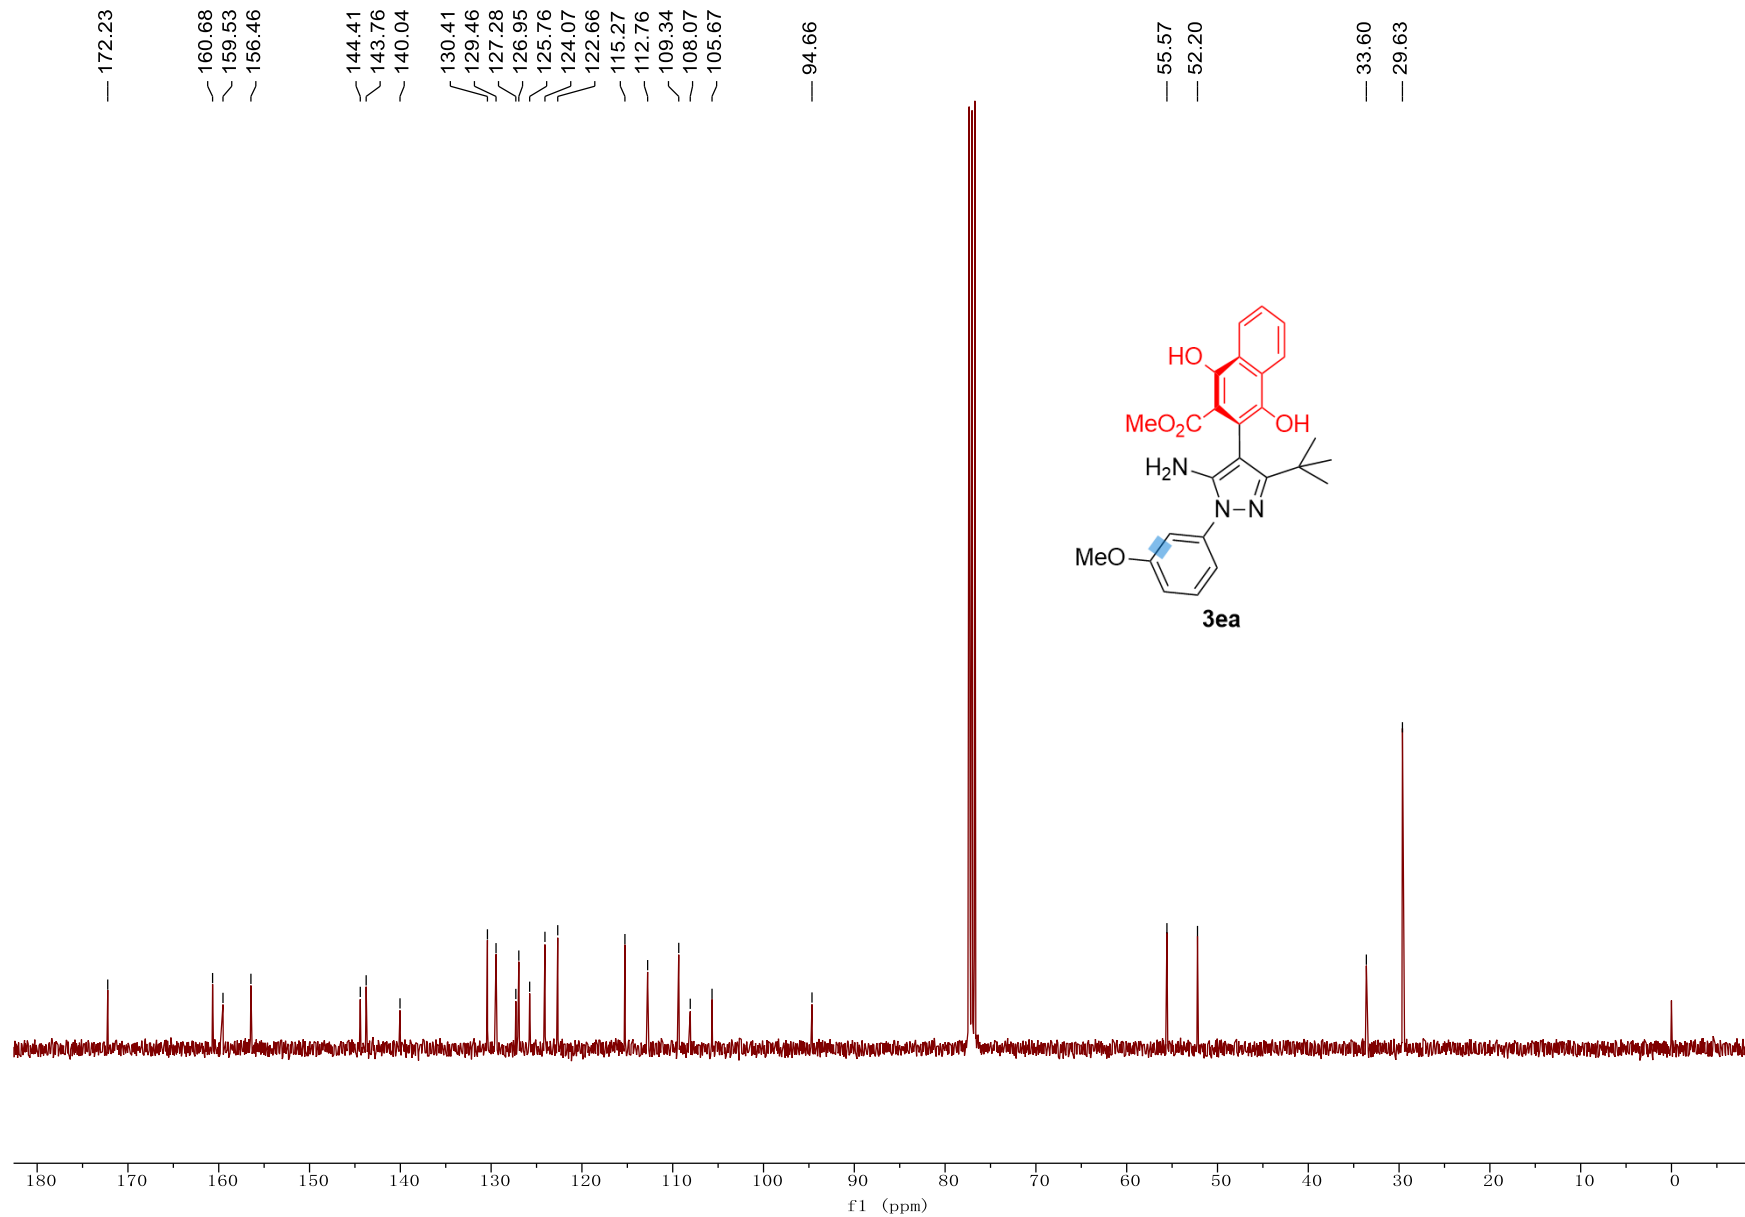



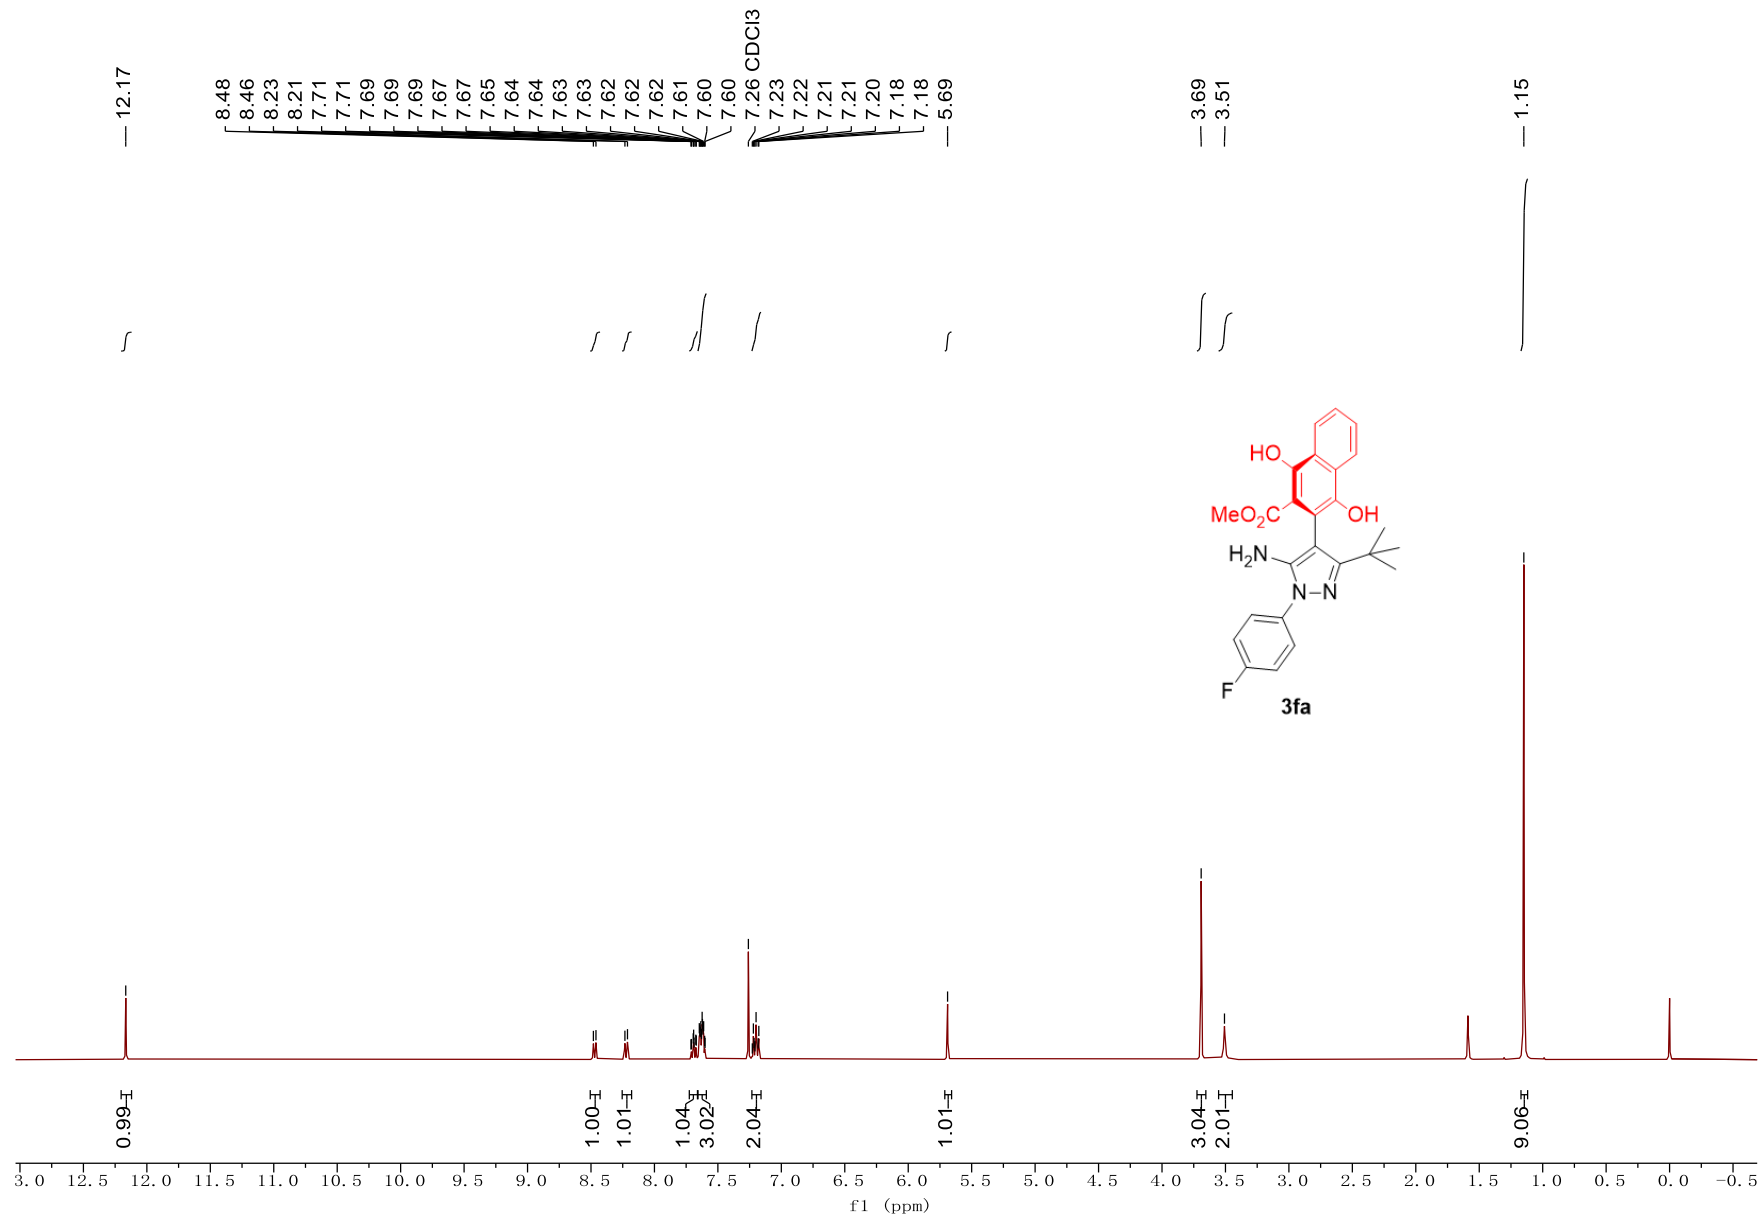

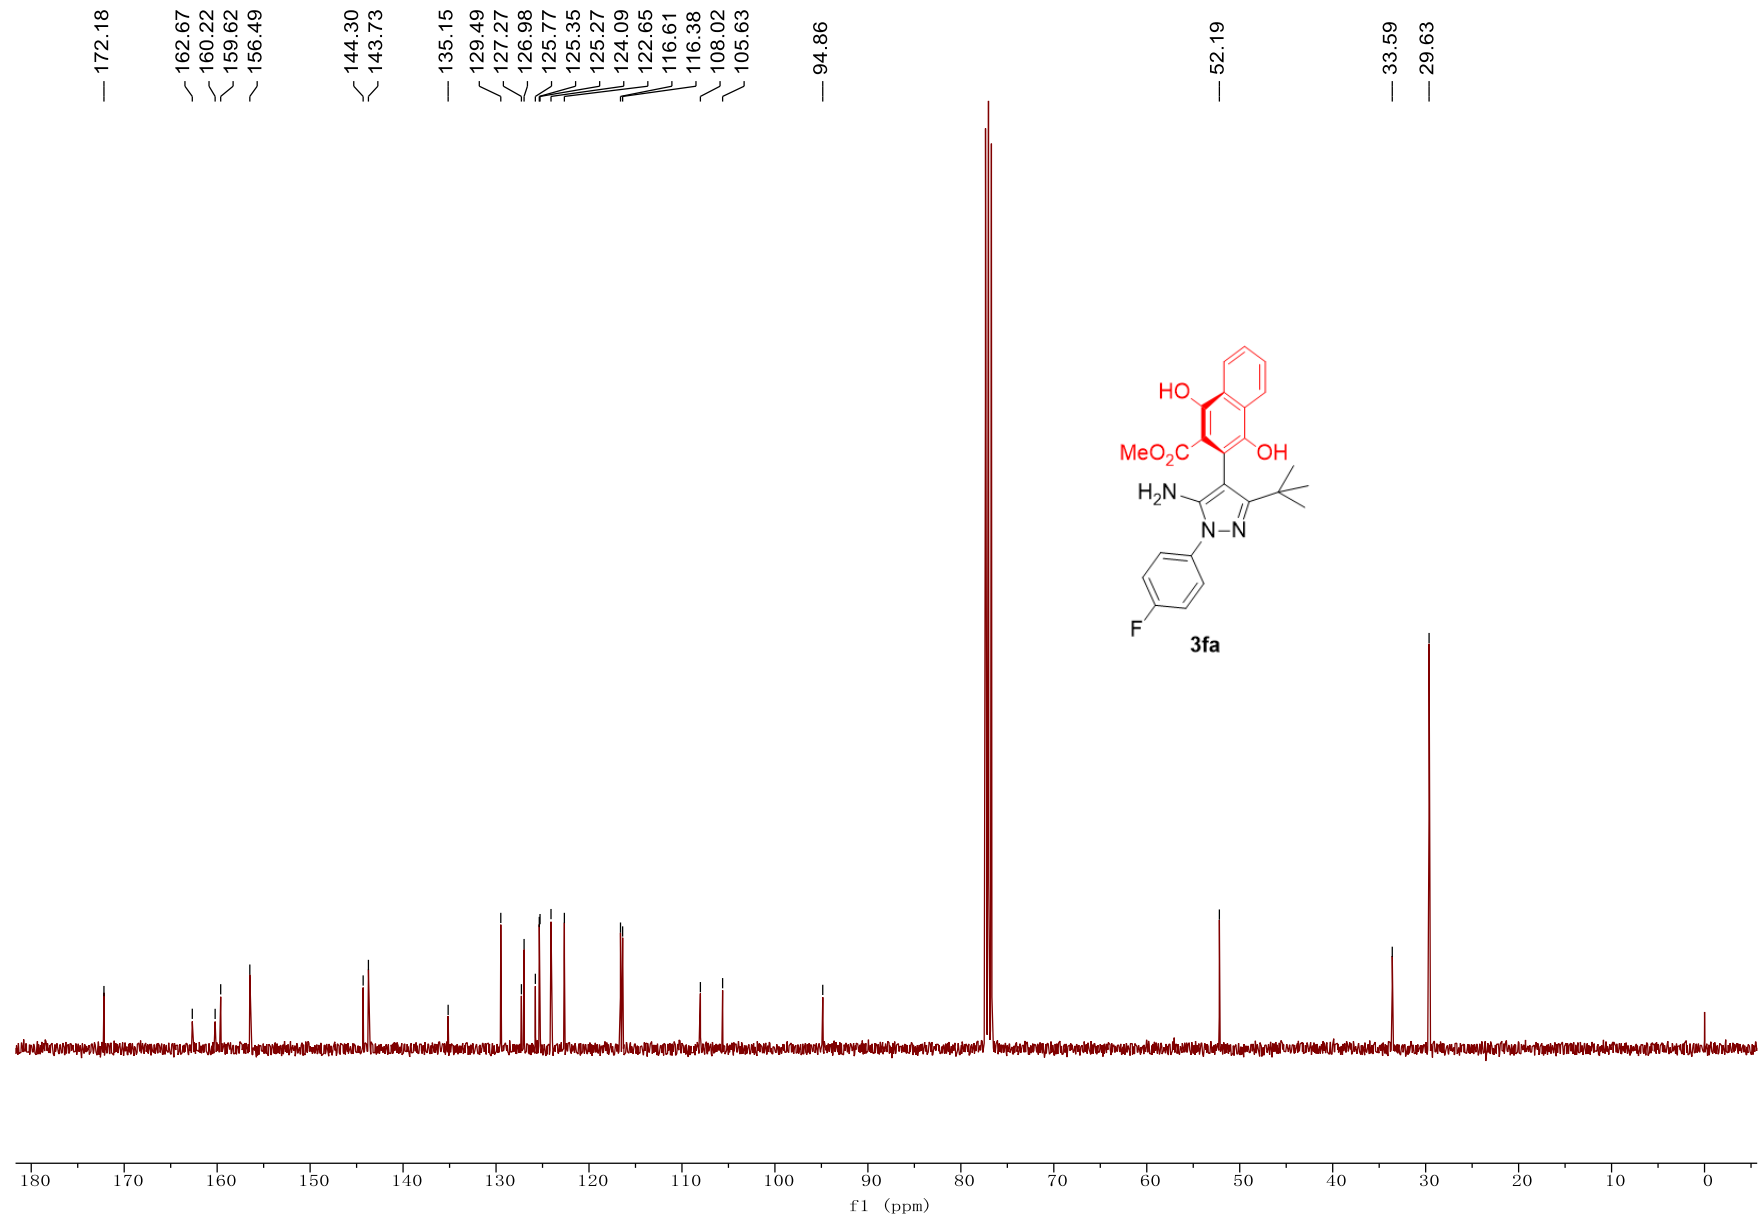

— -114.38

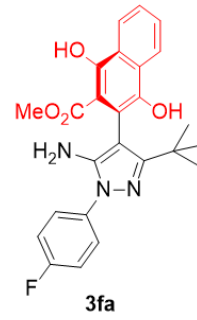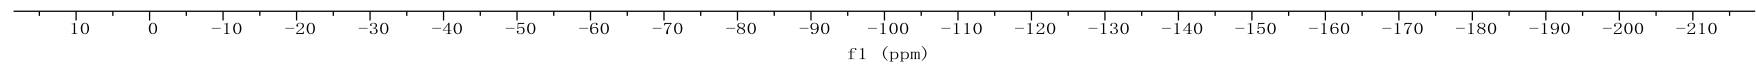

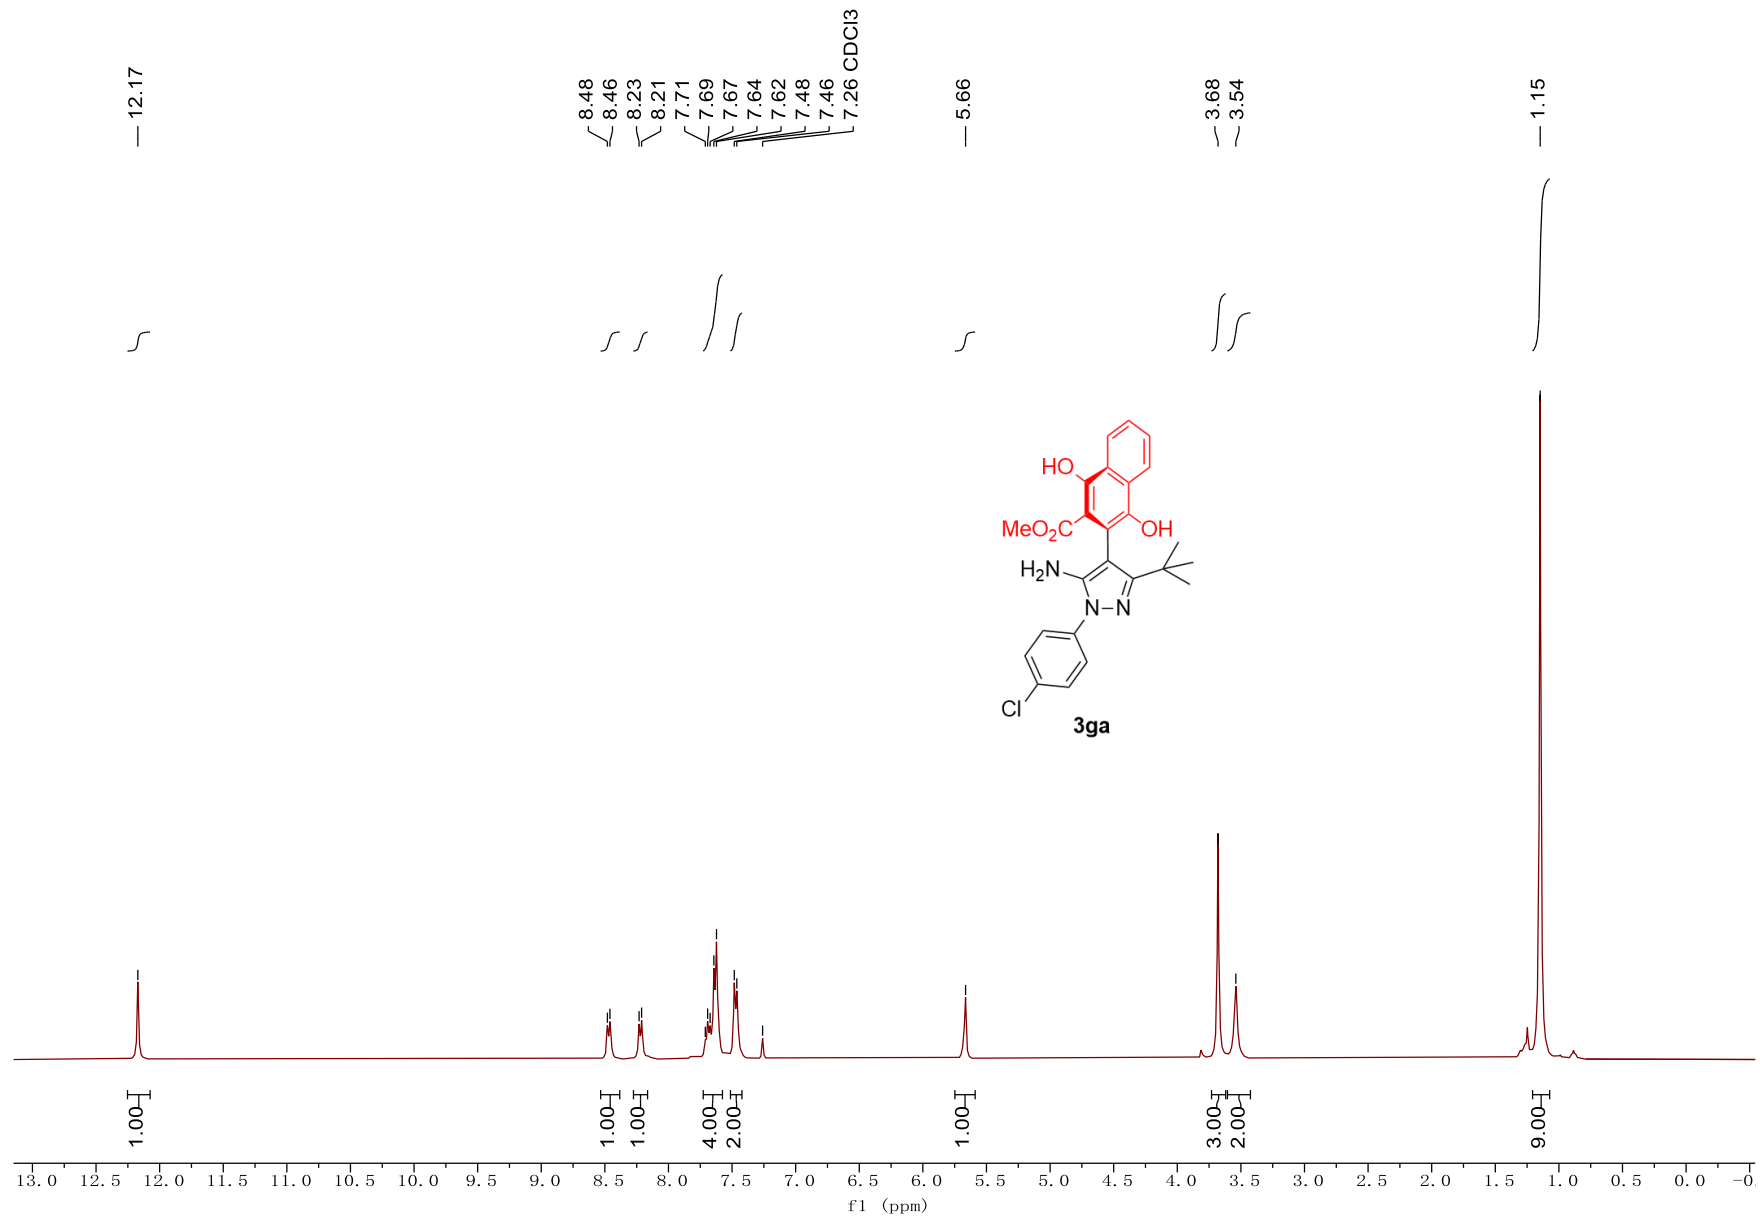

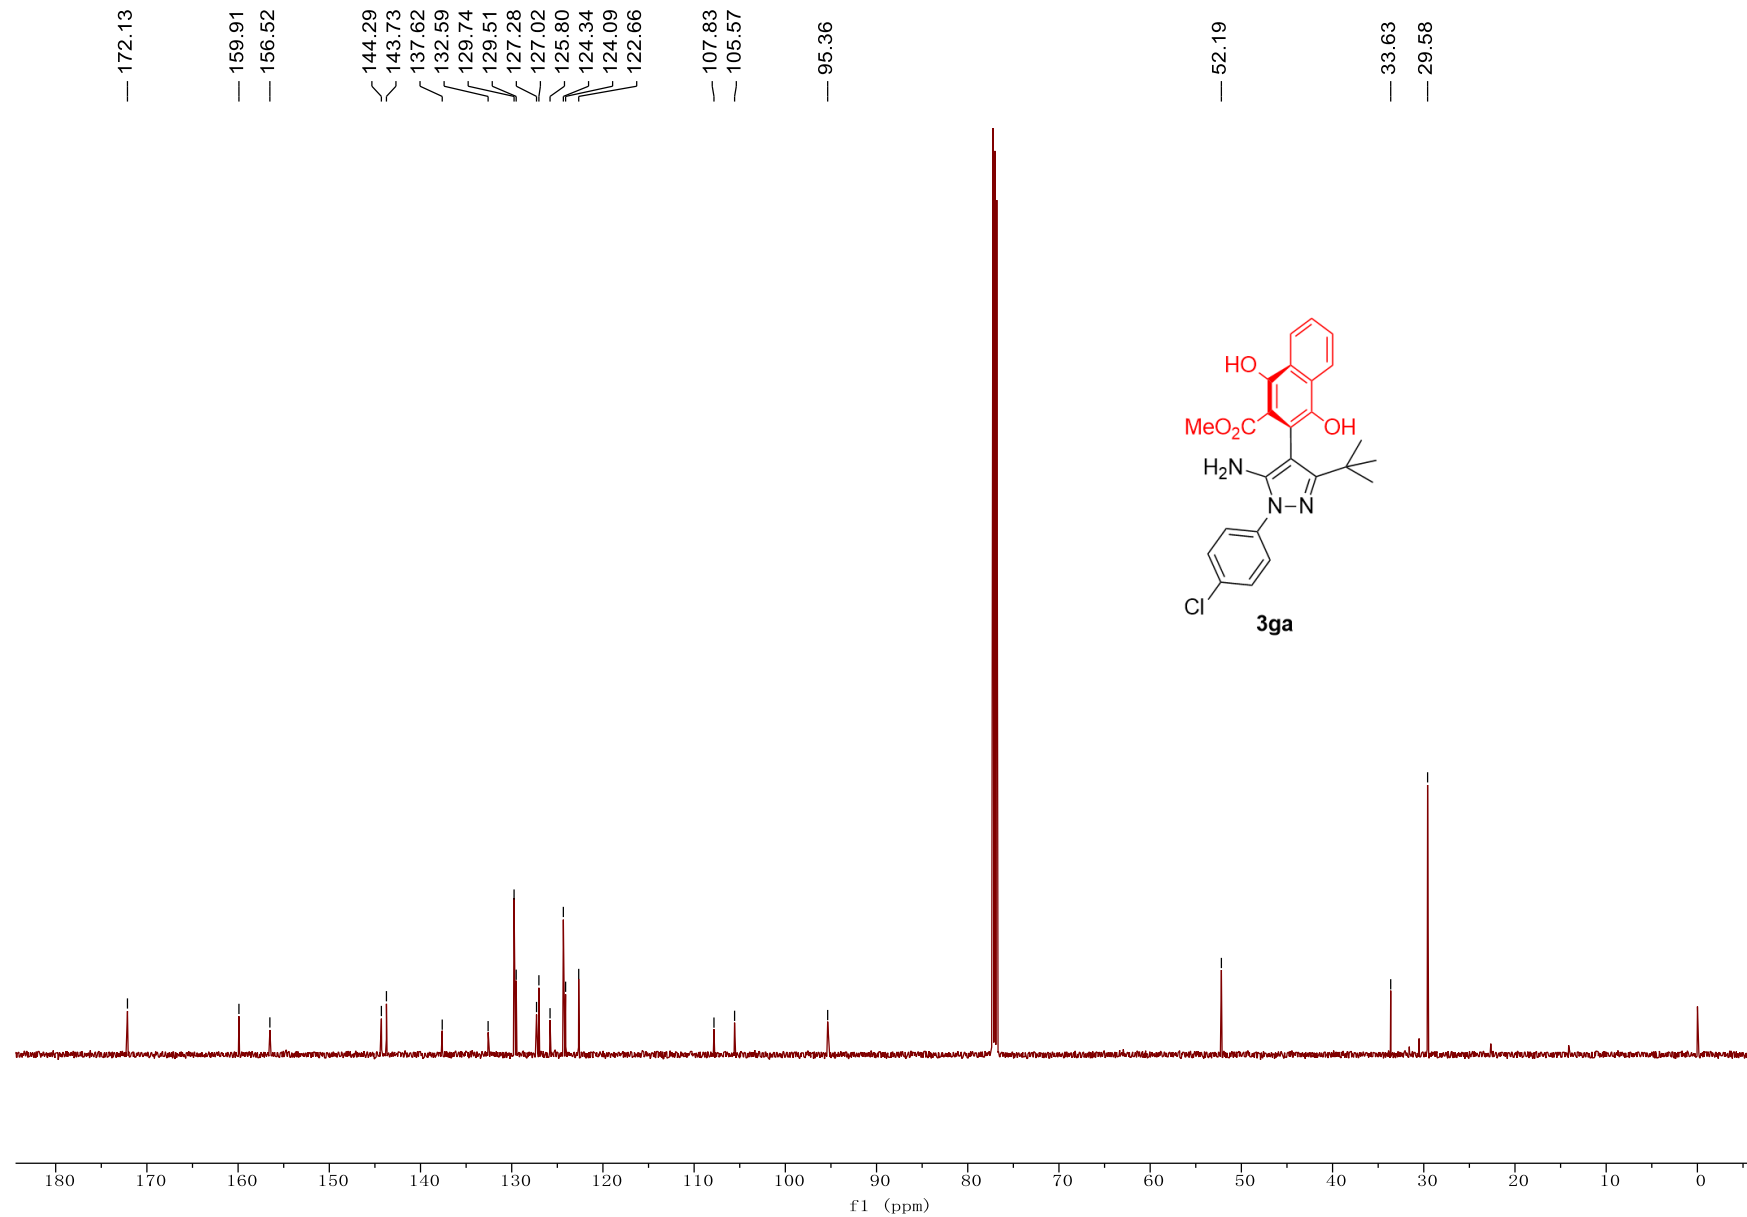

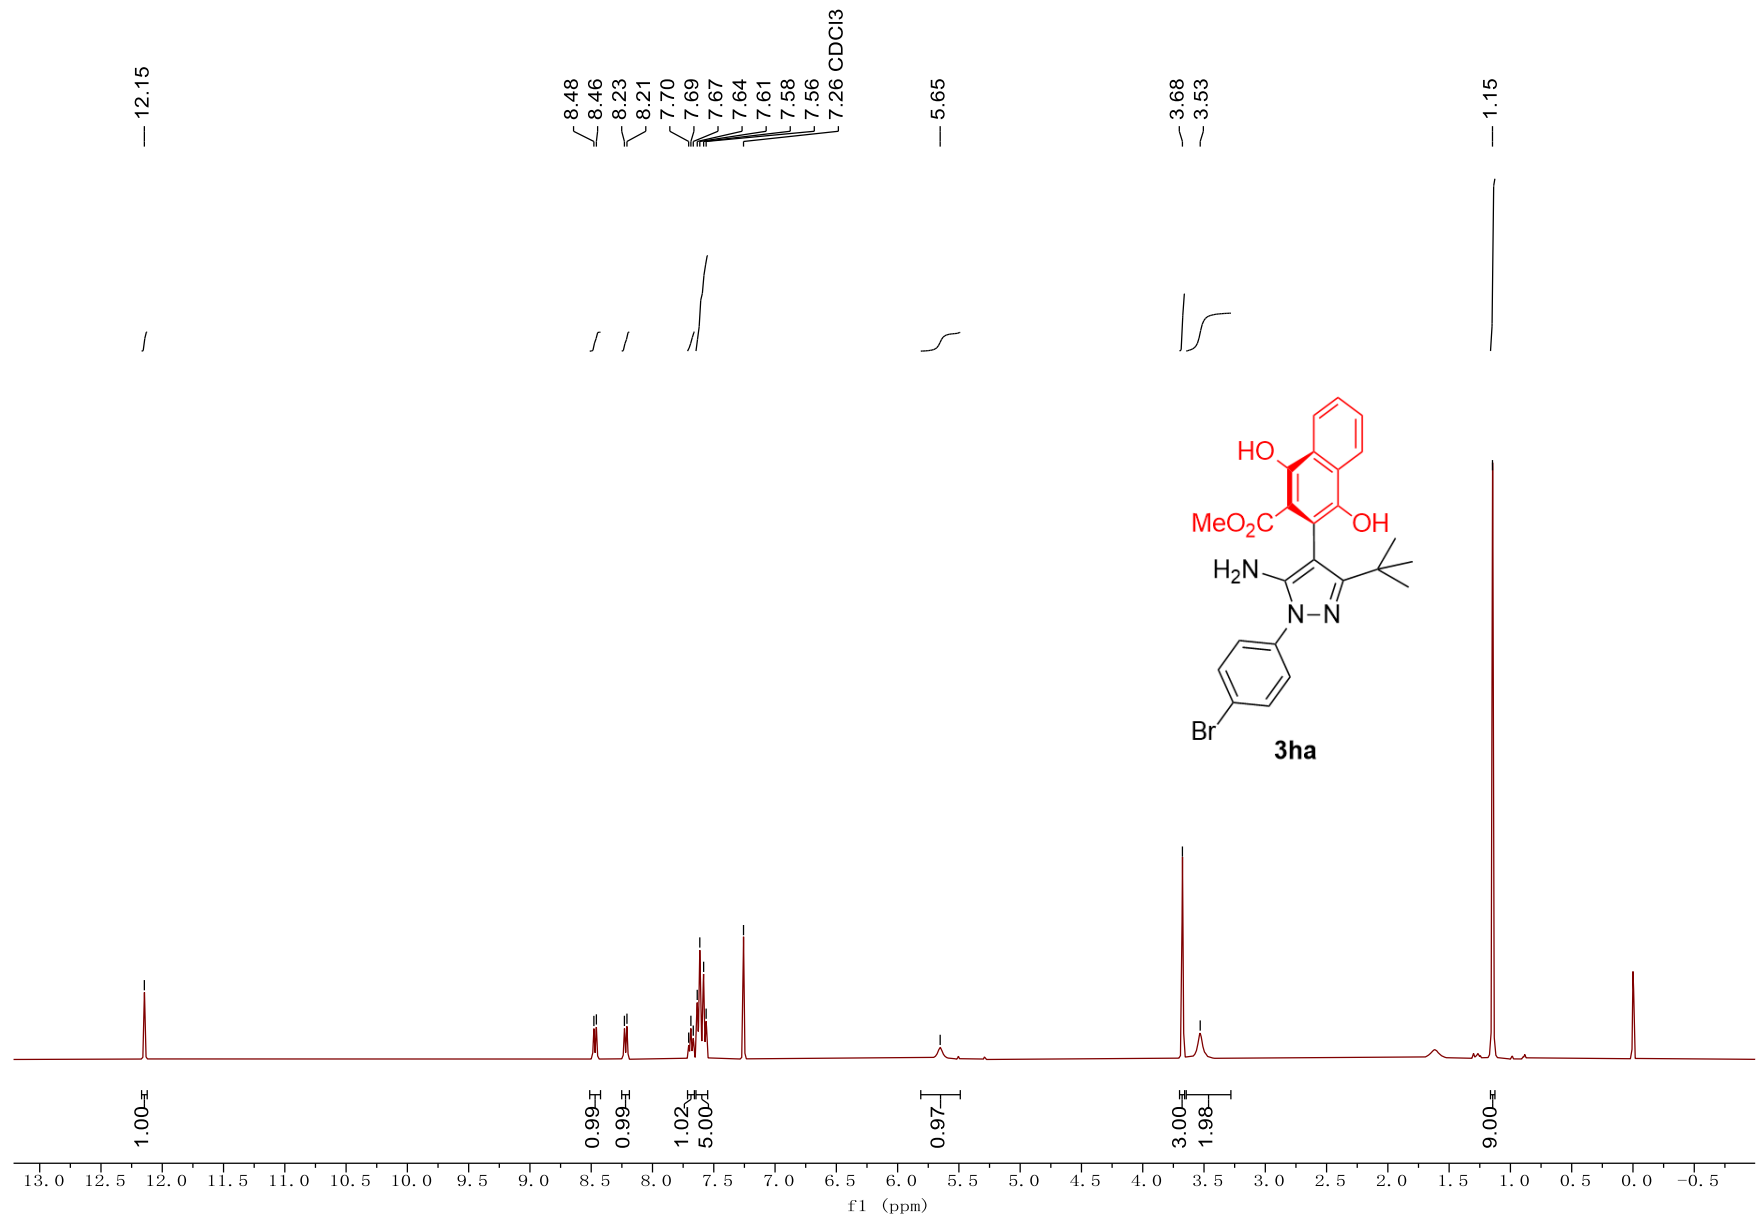

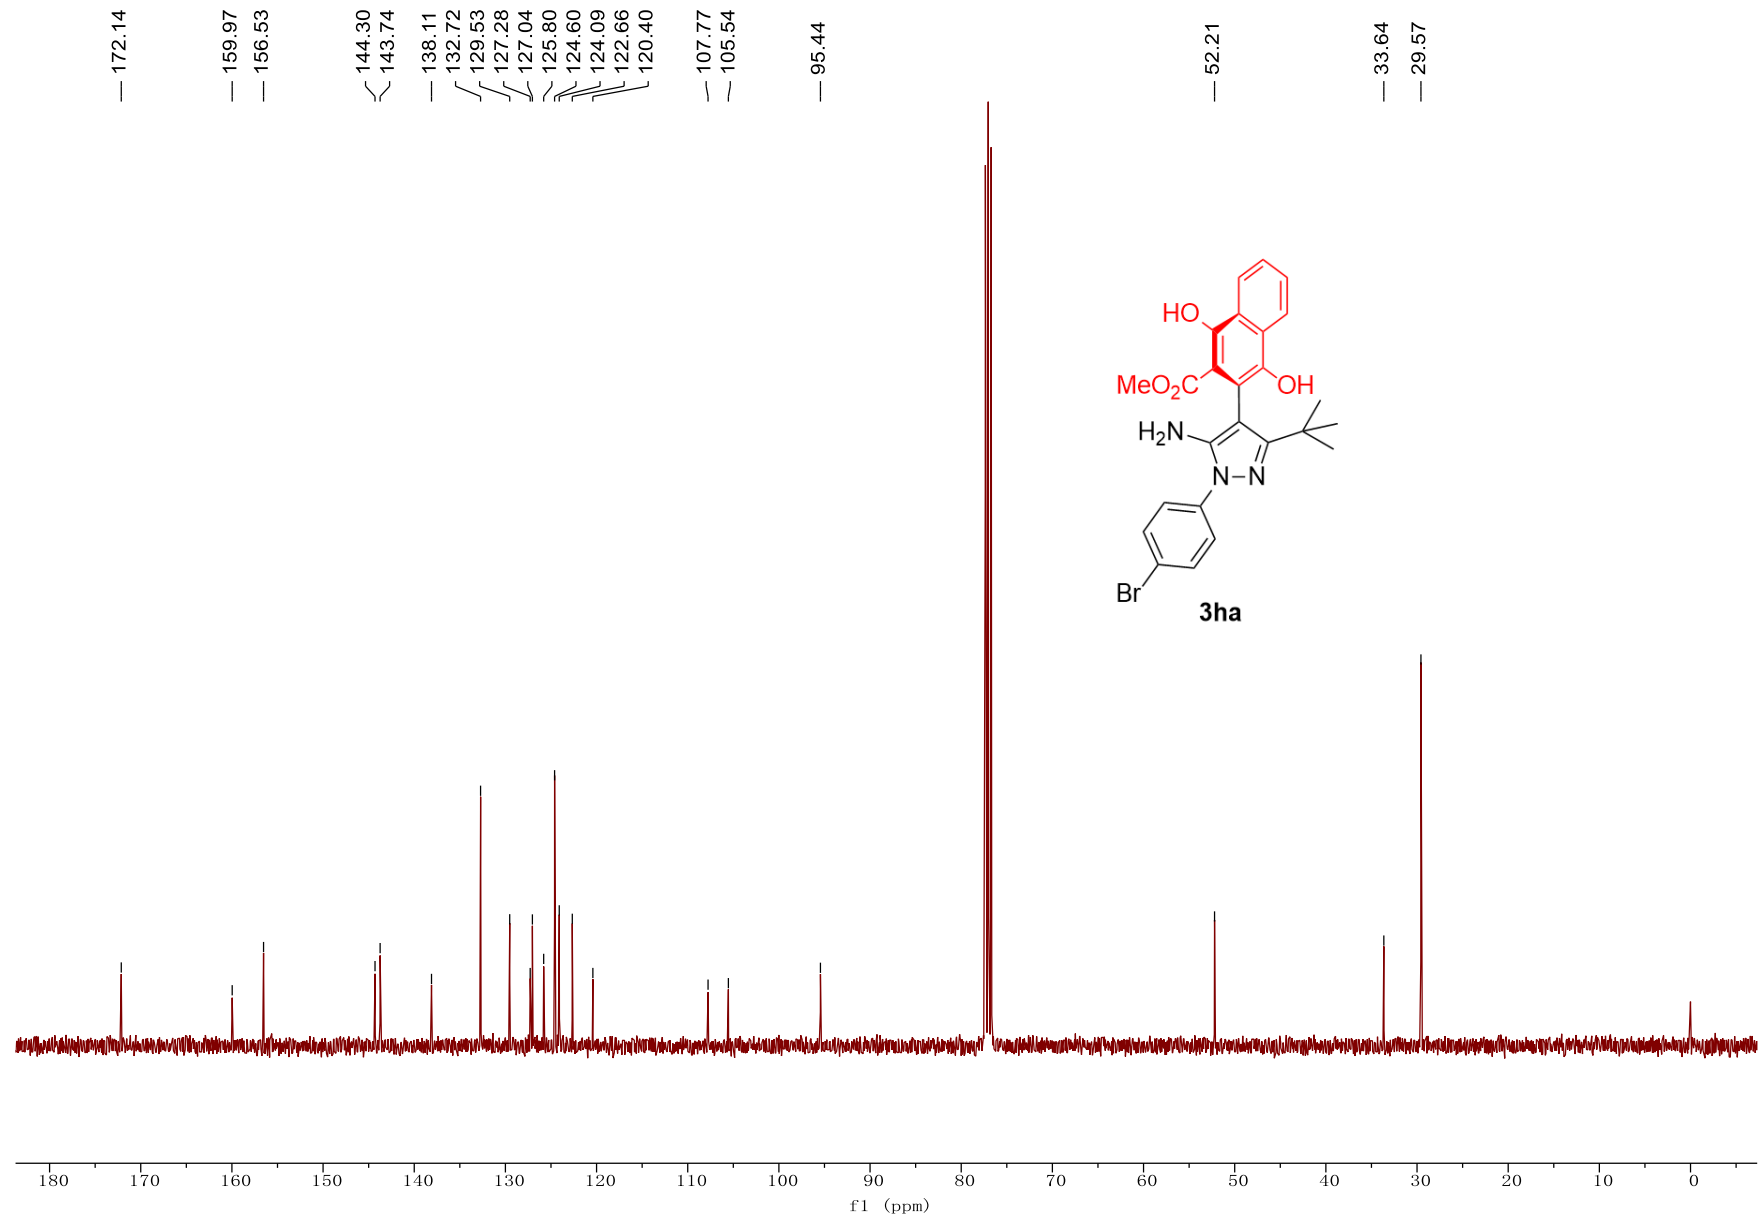

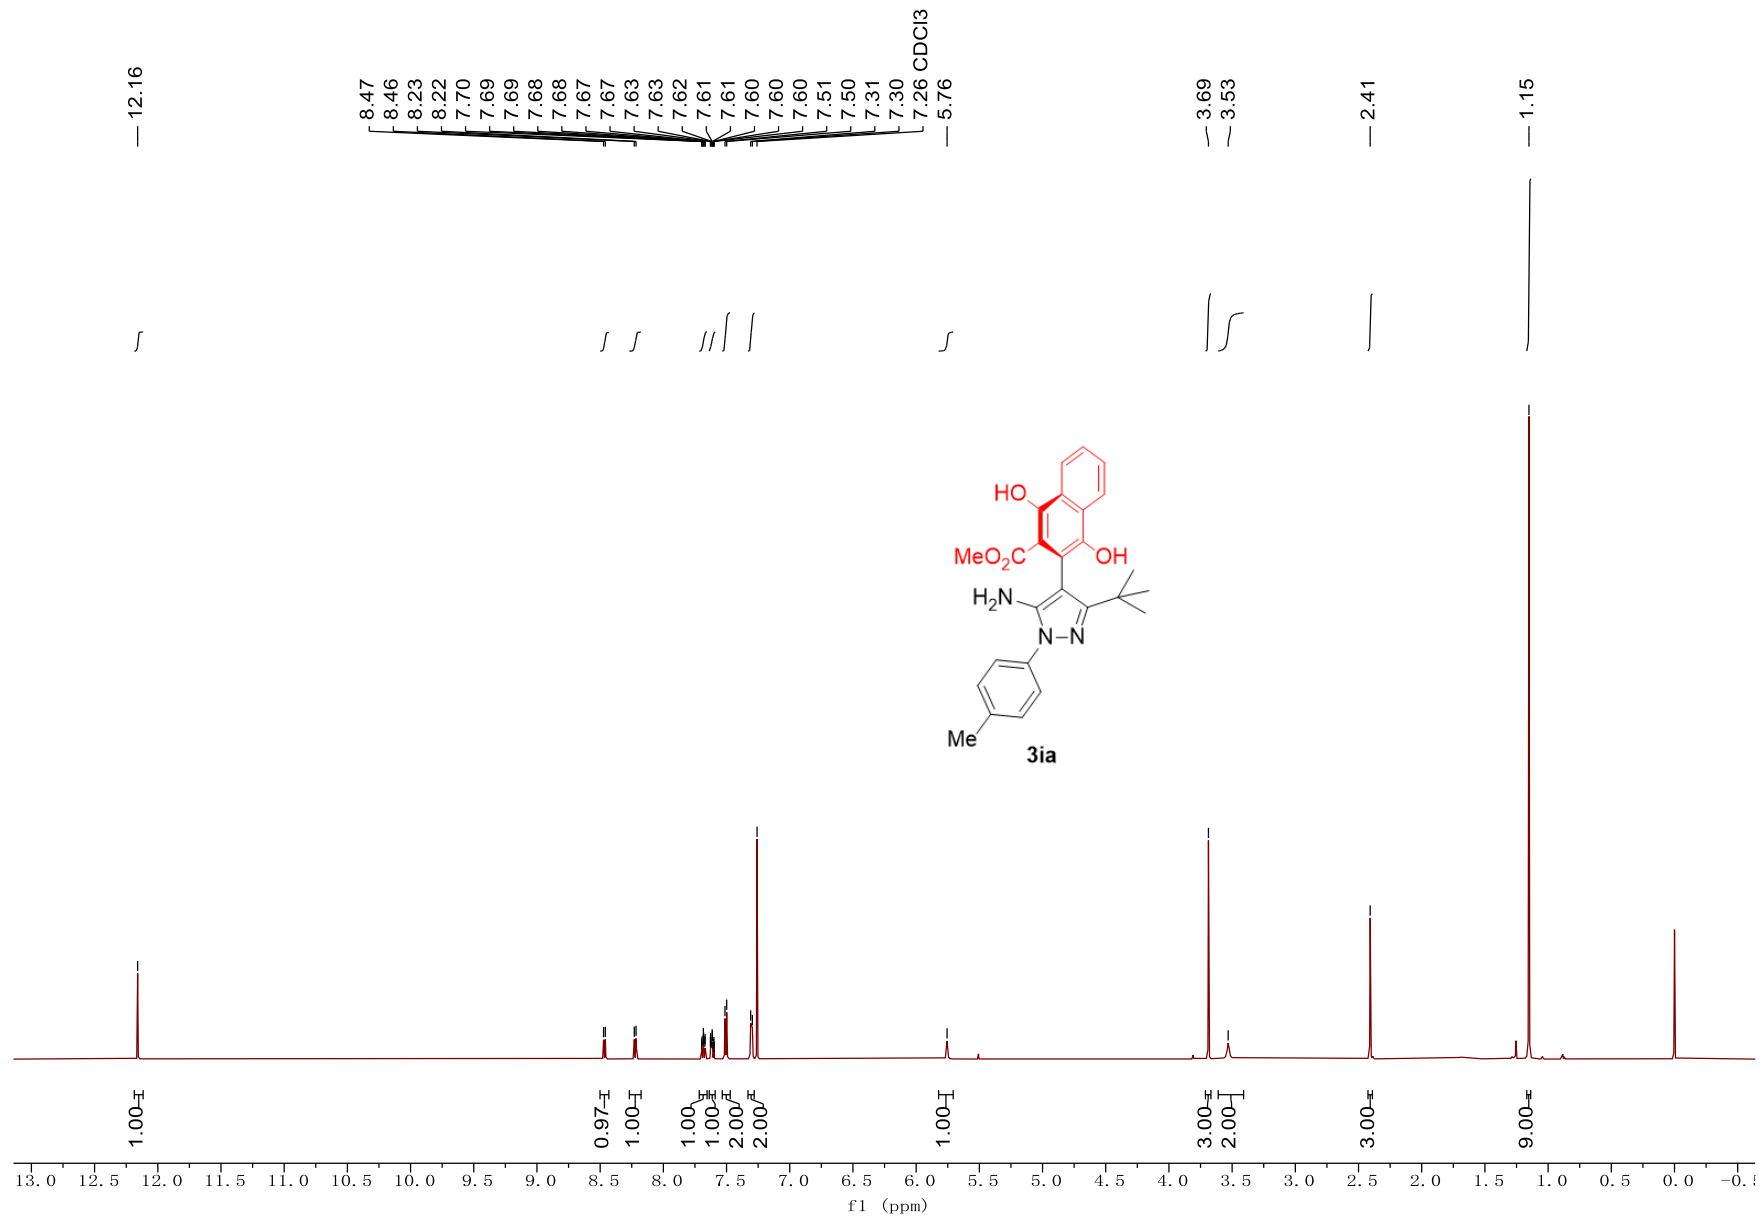



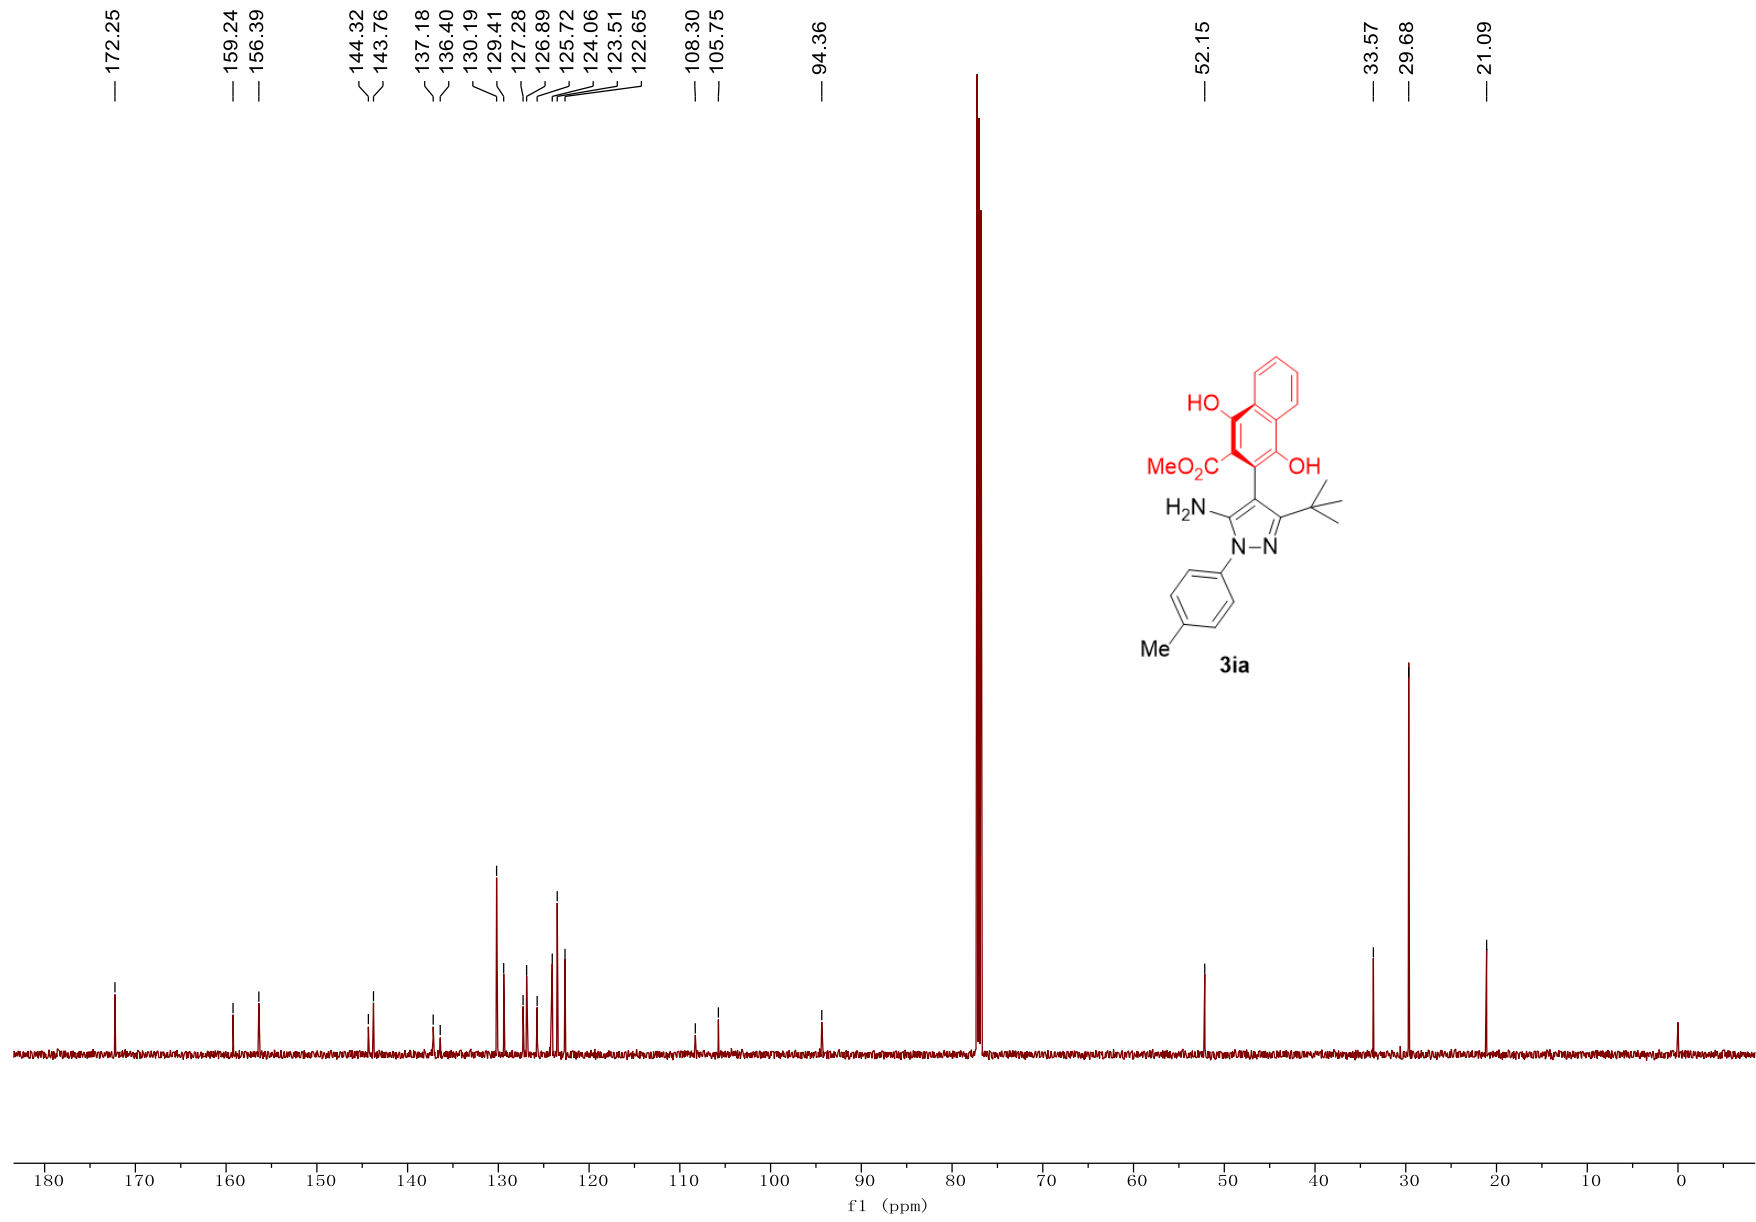

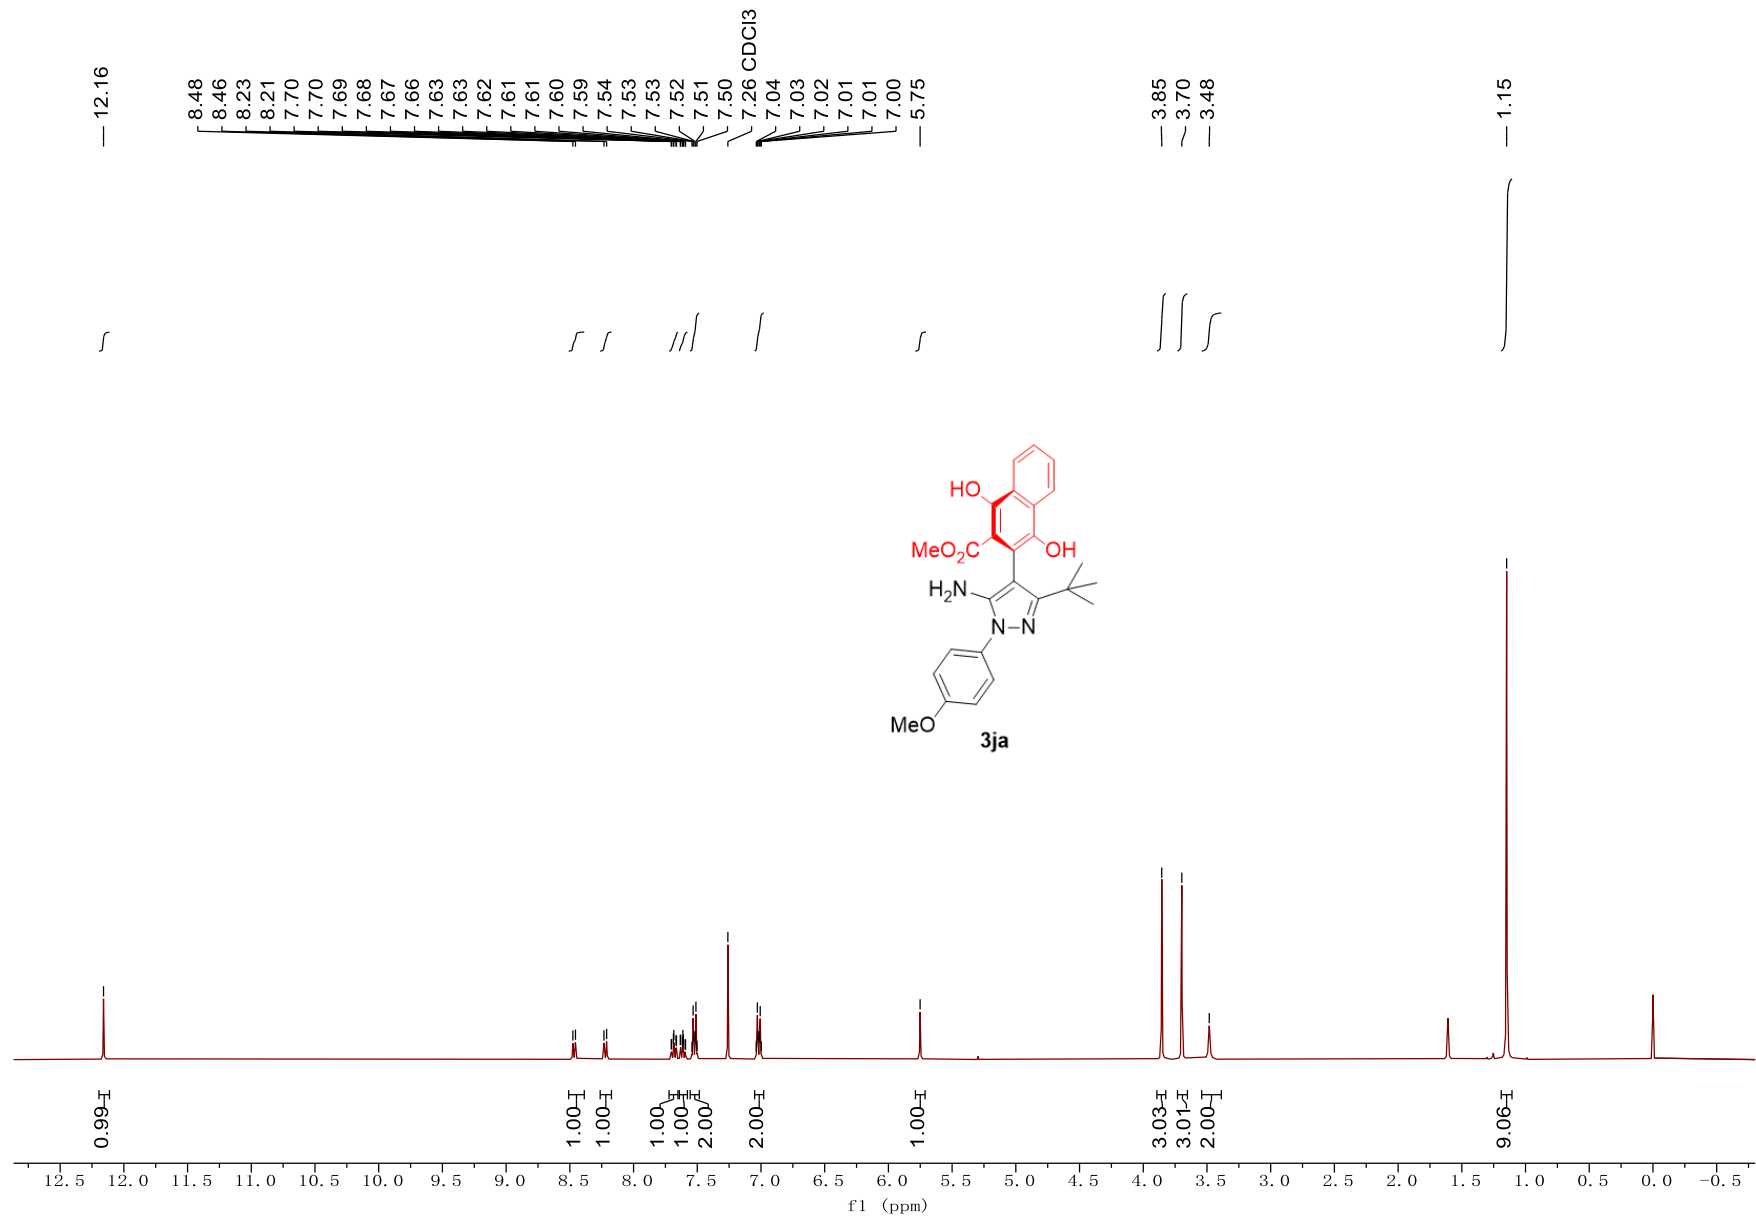

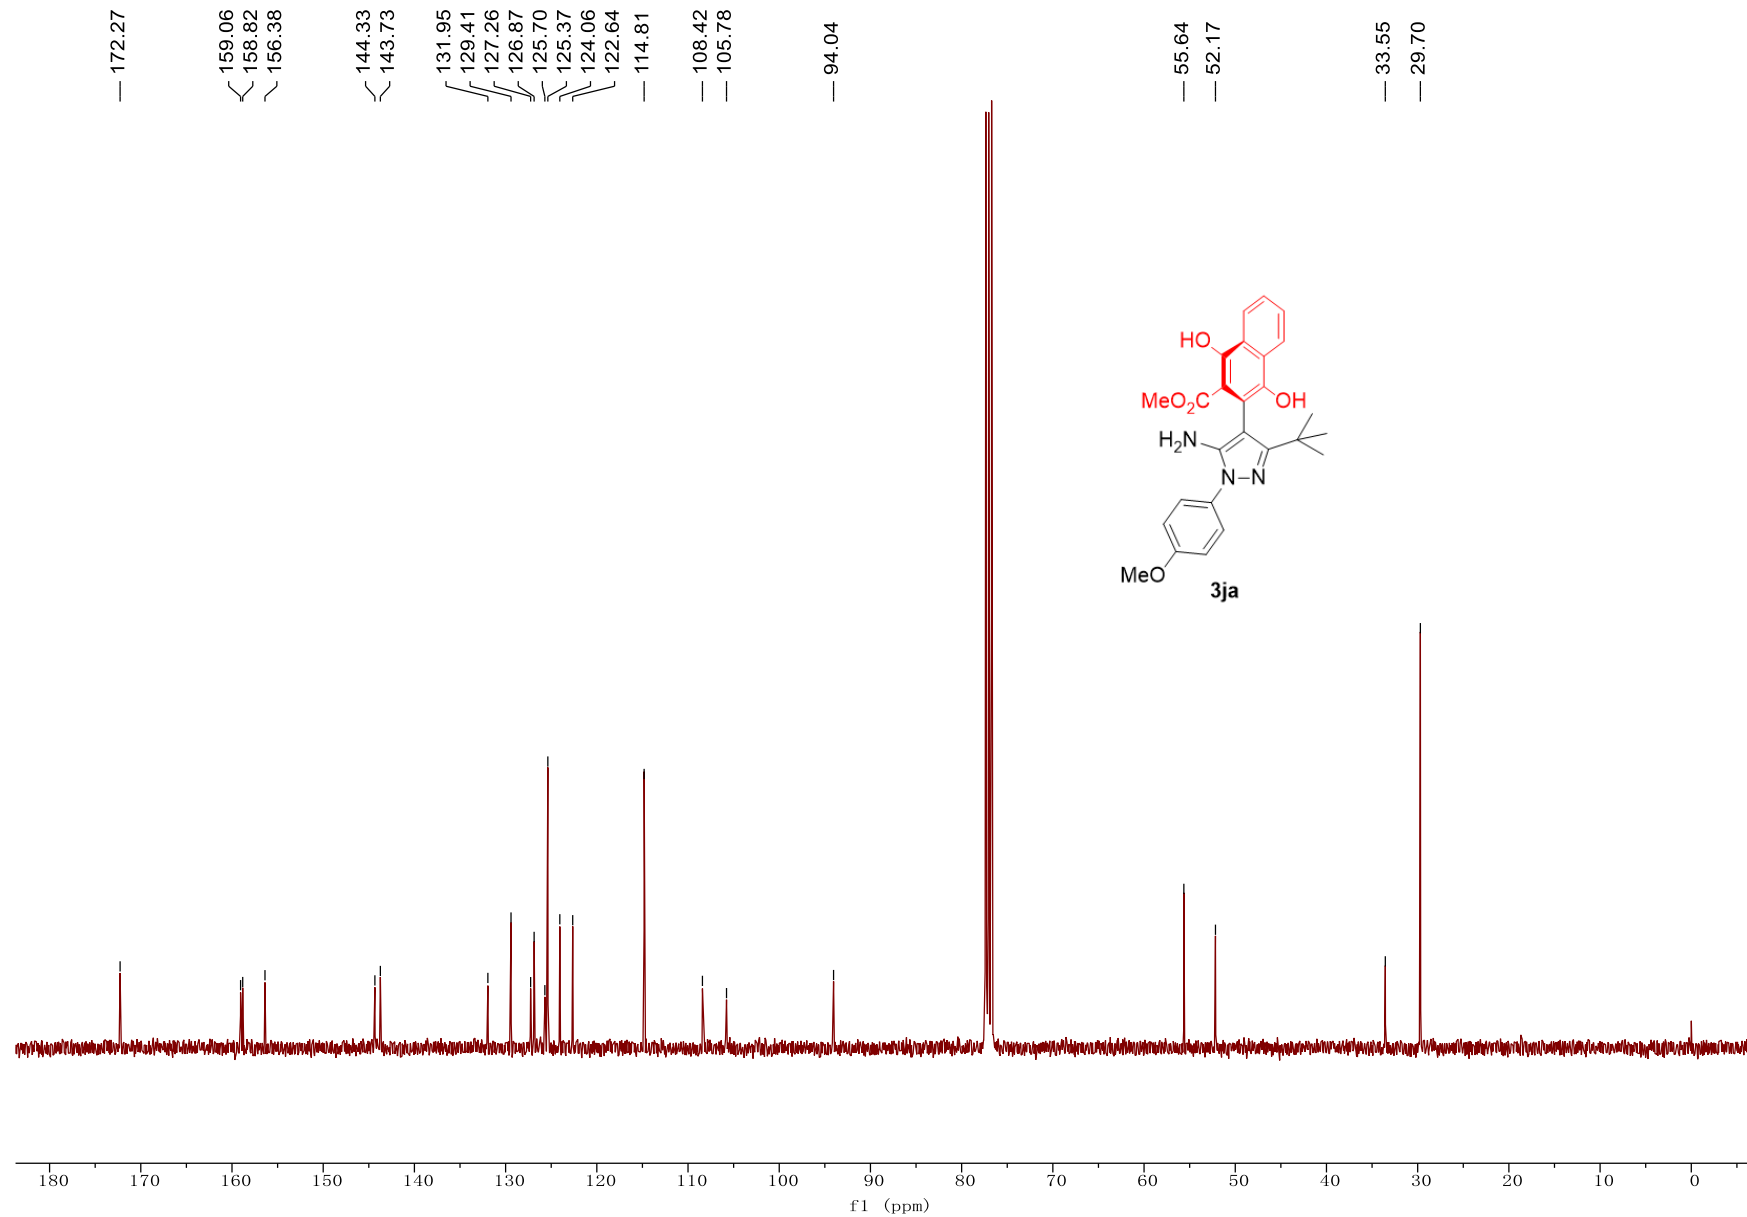

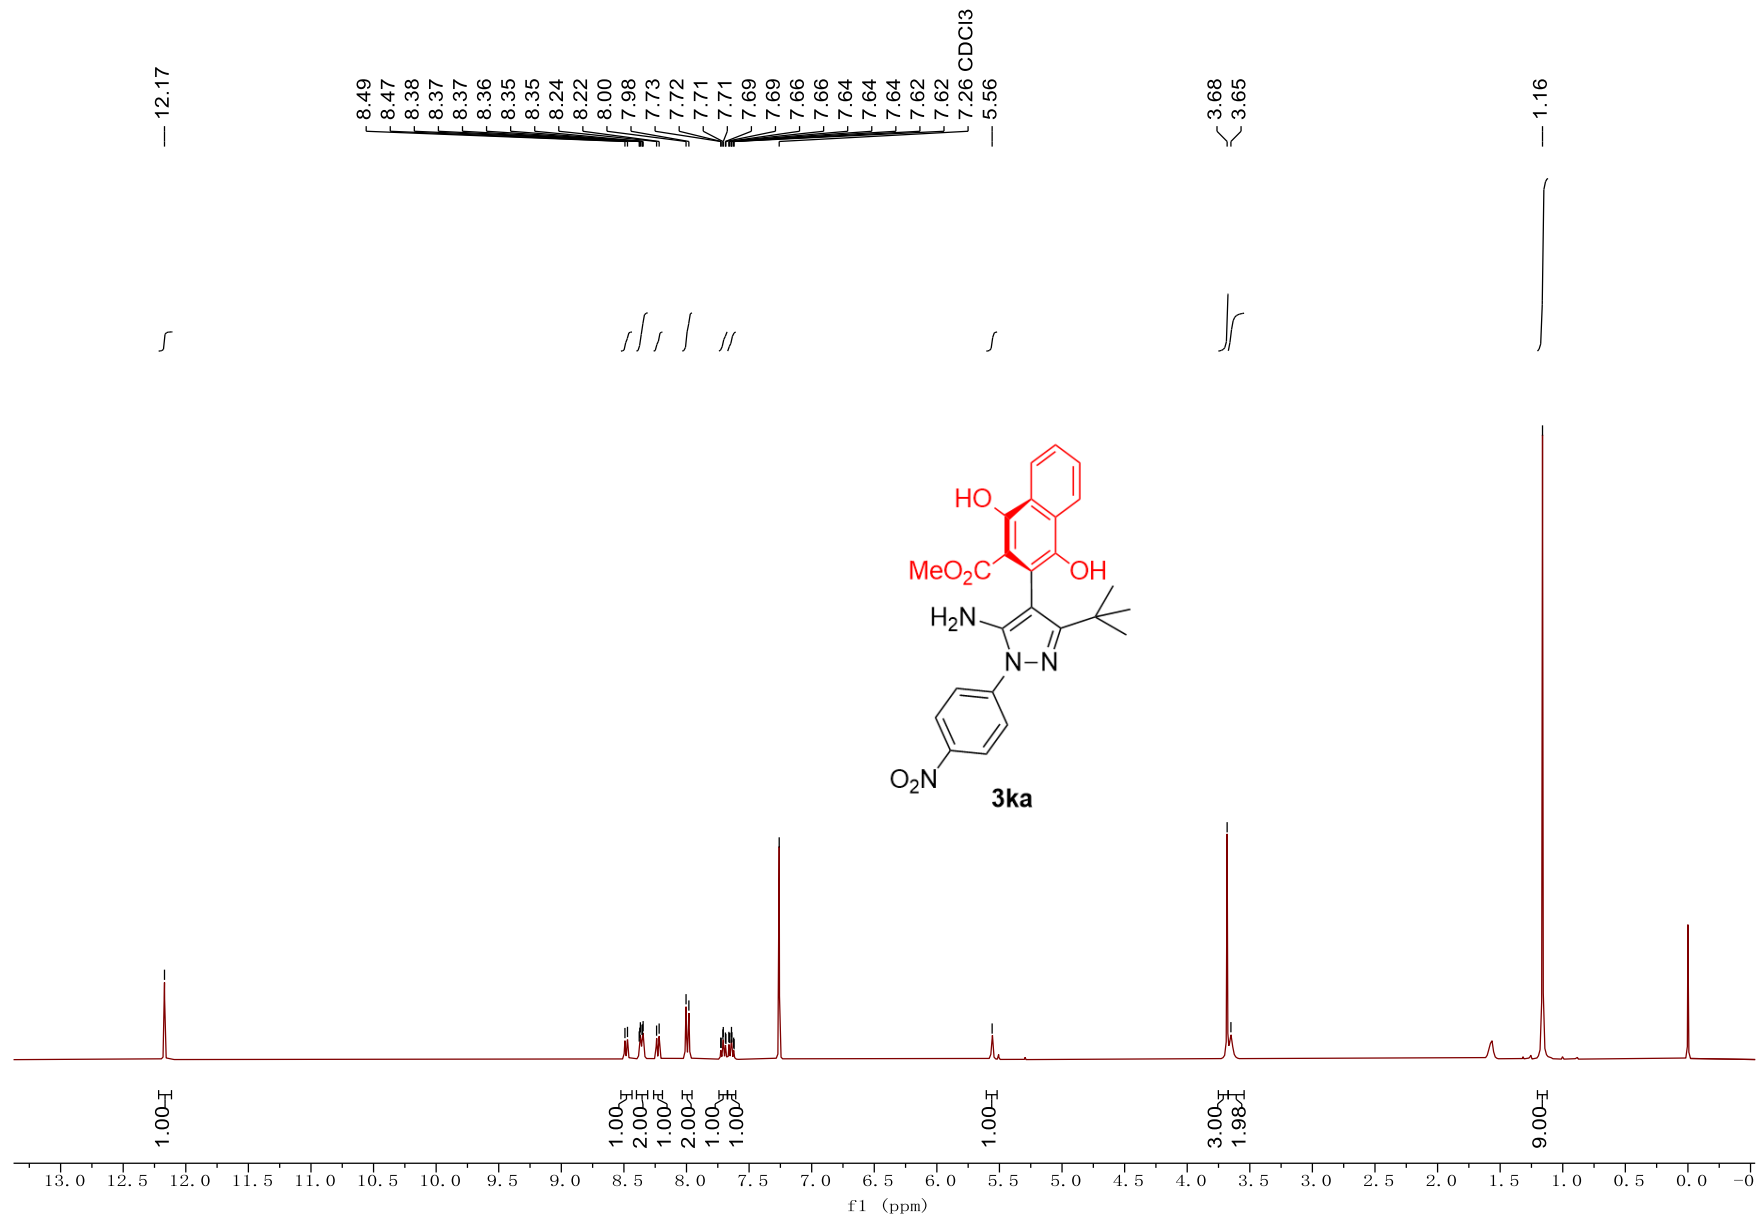

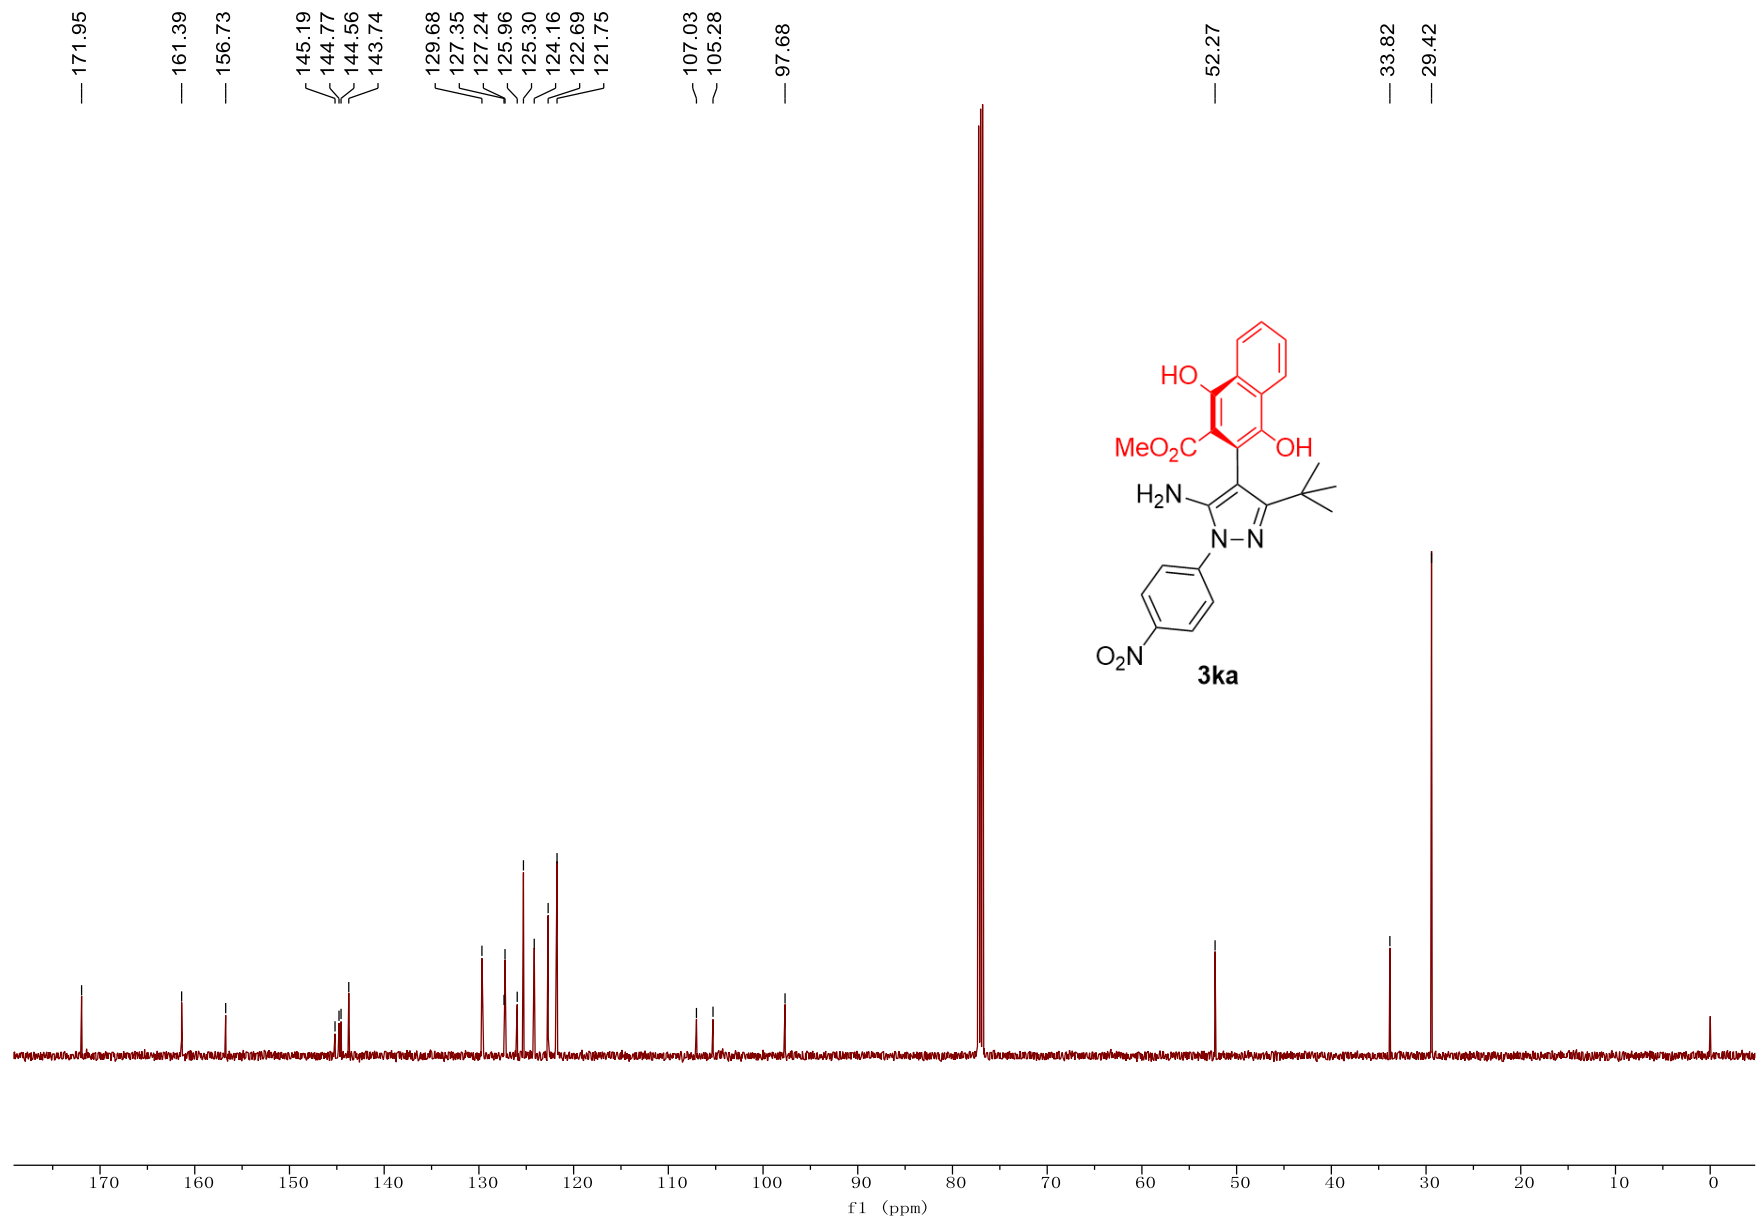

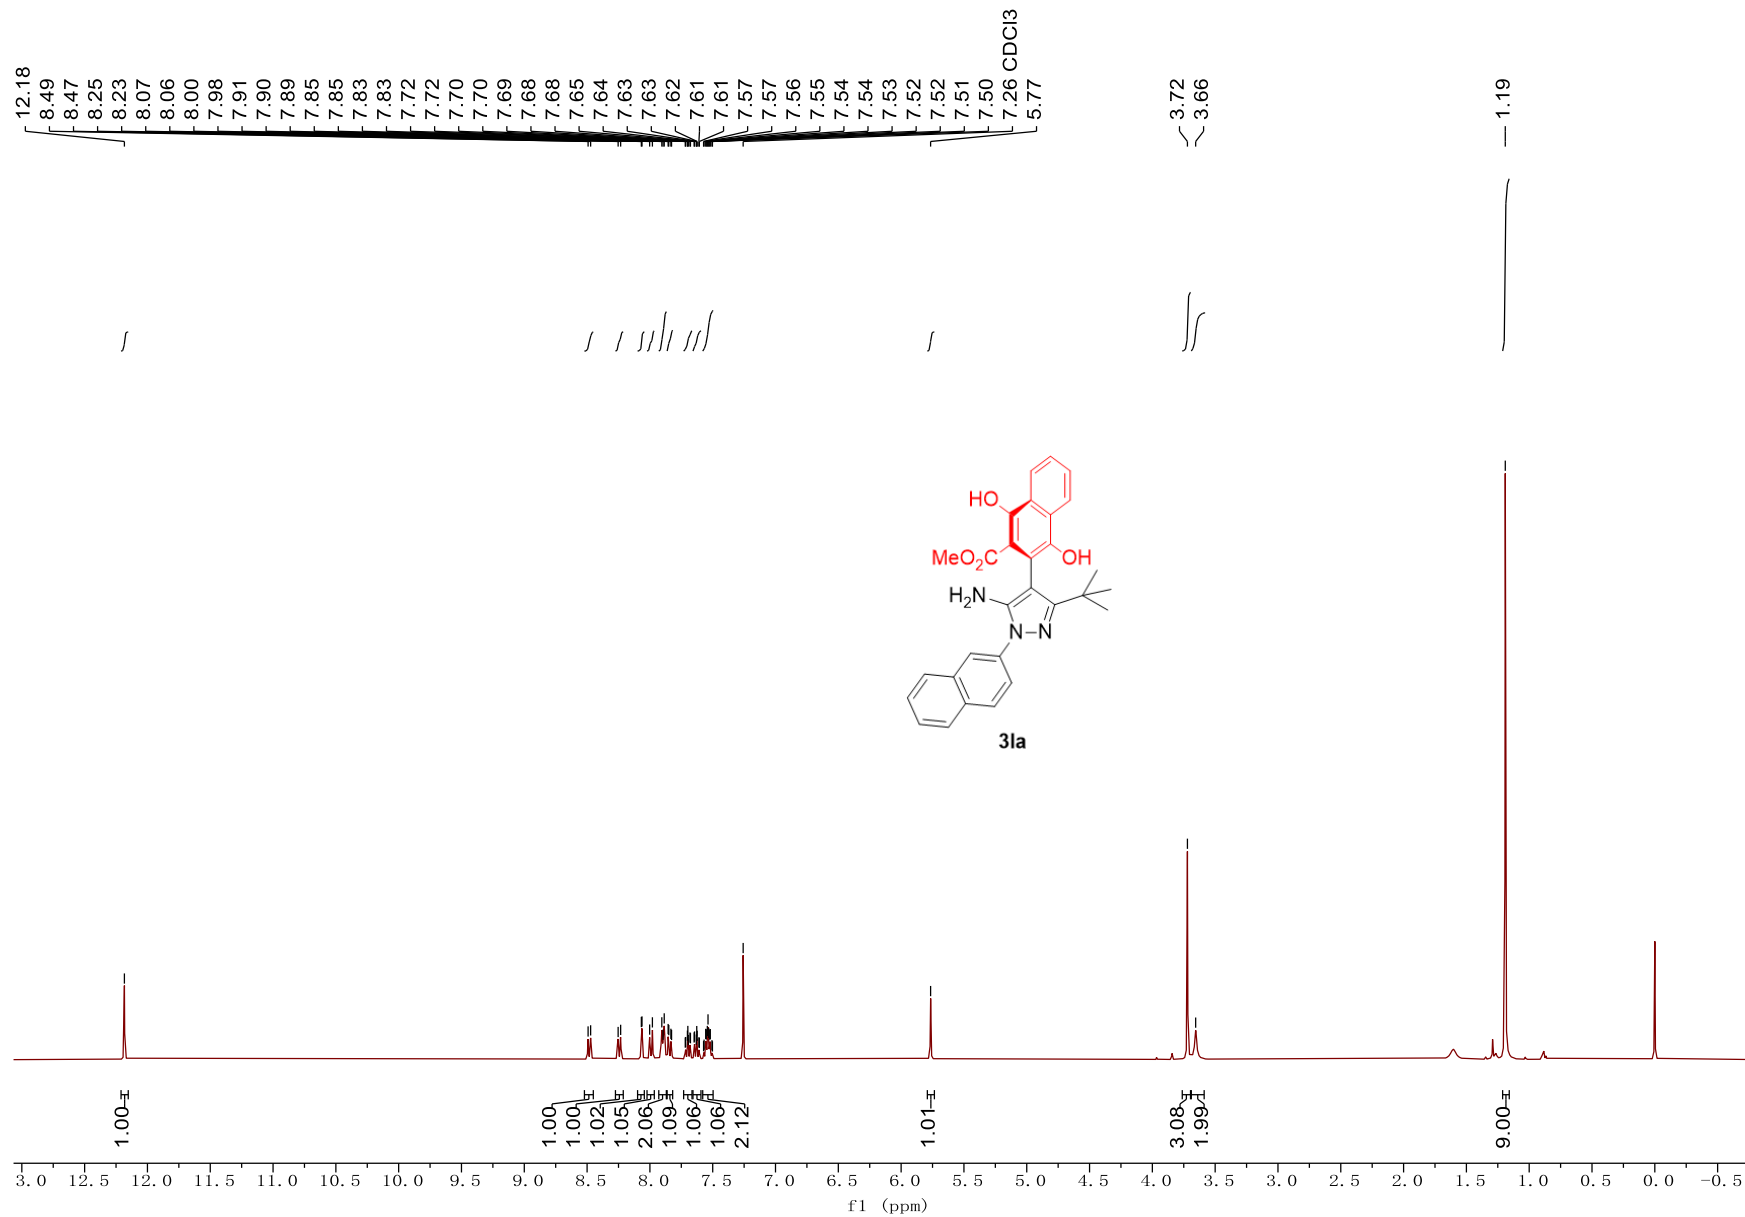

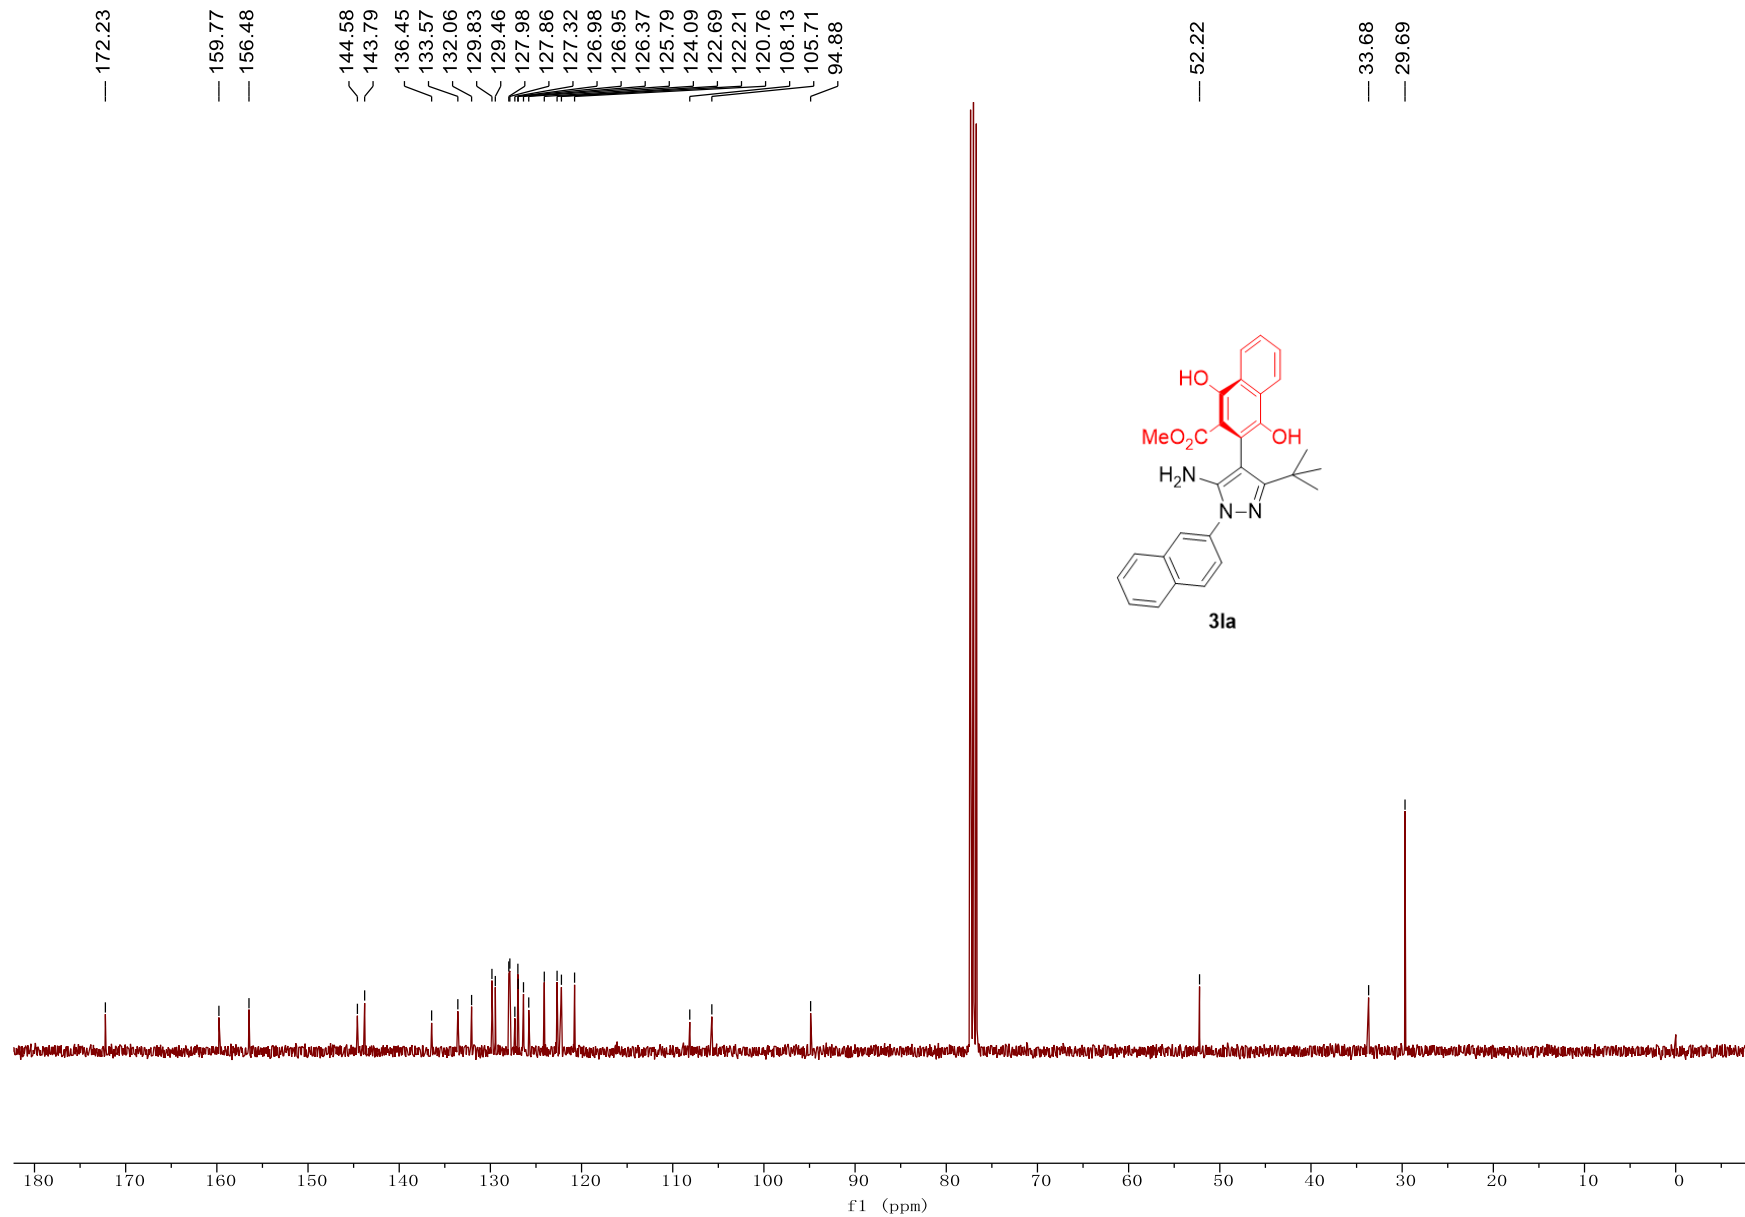

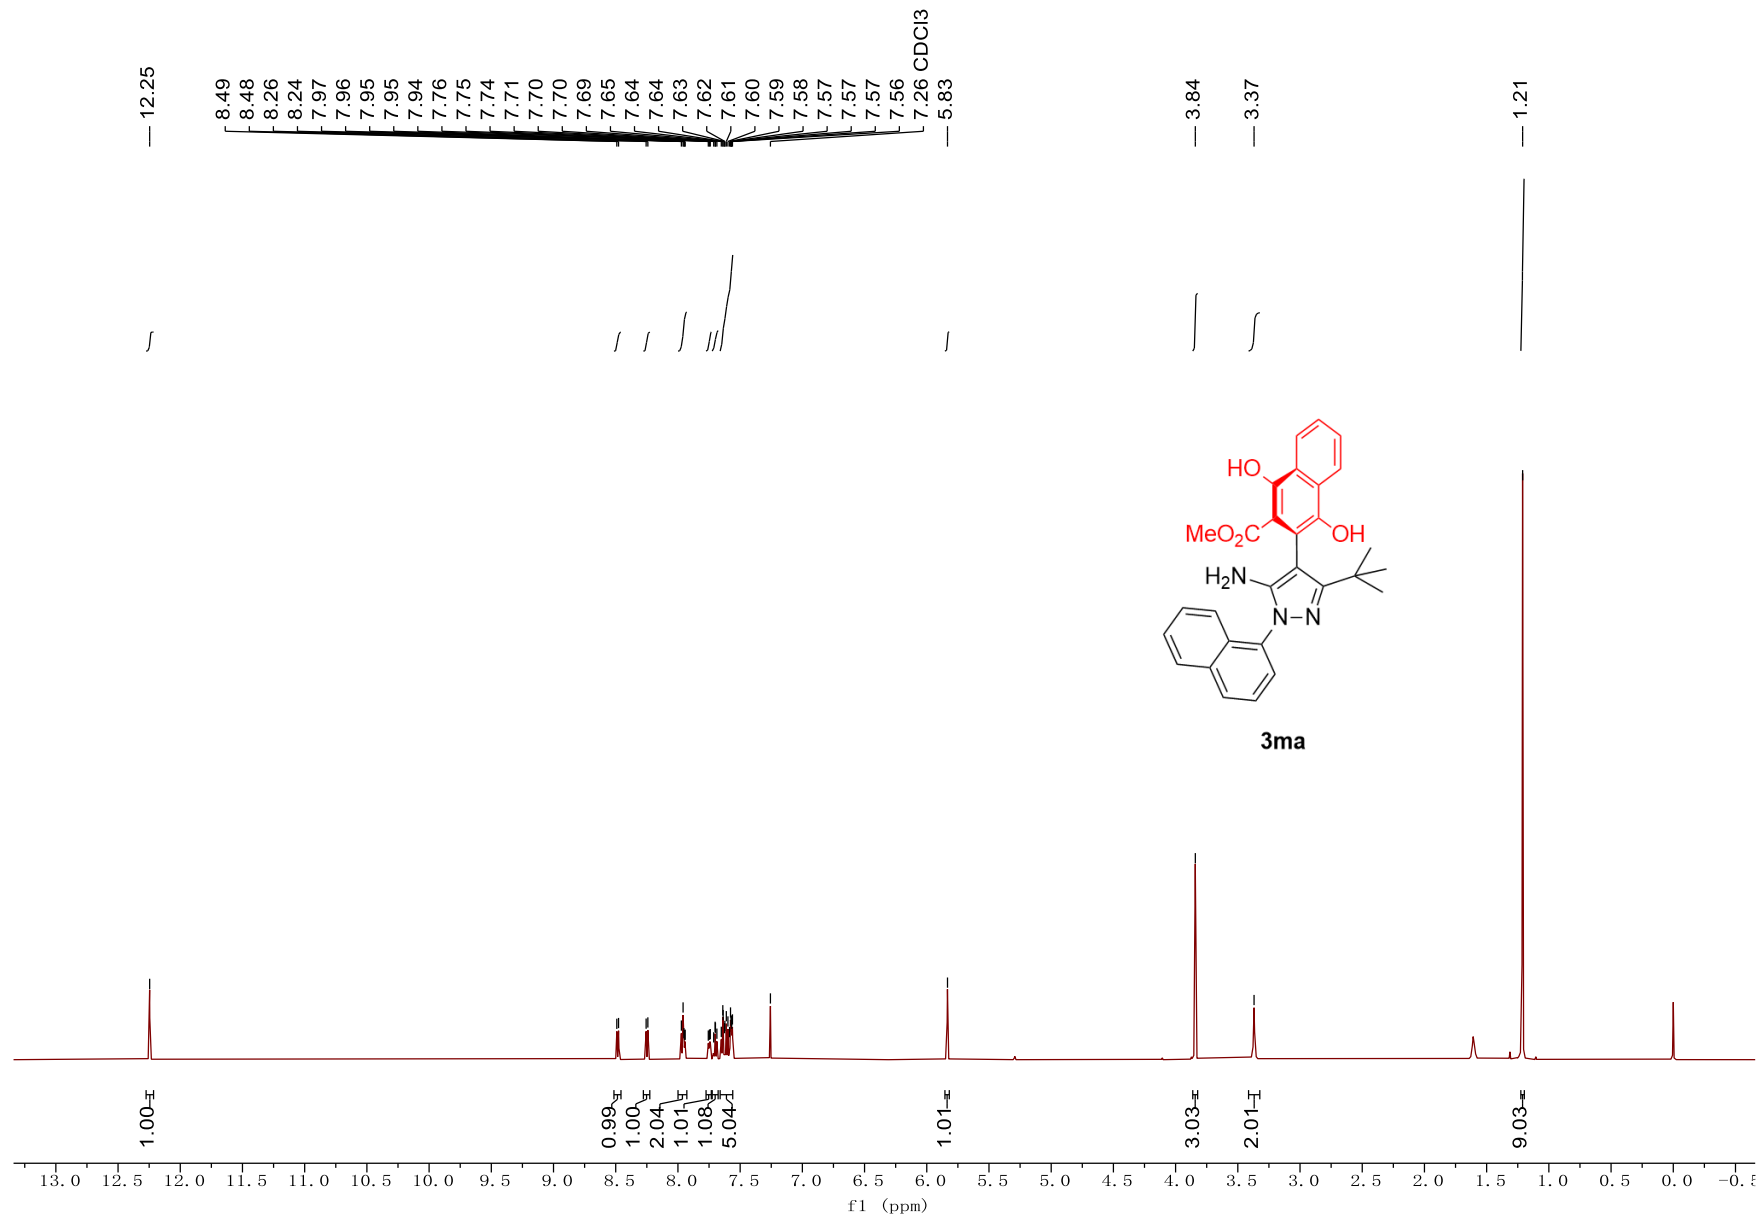



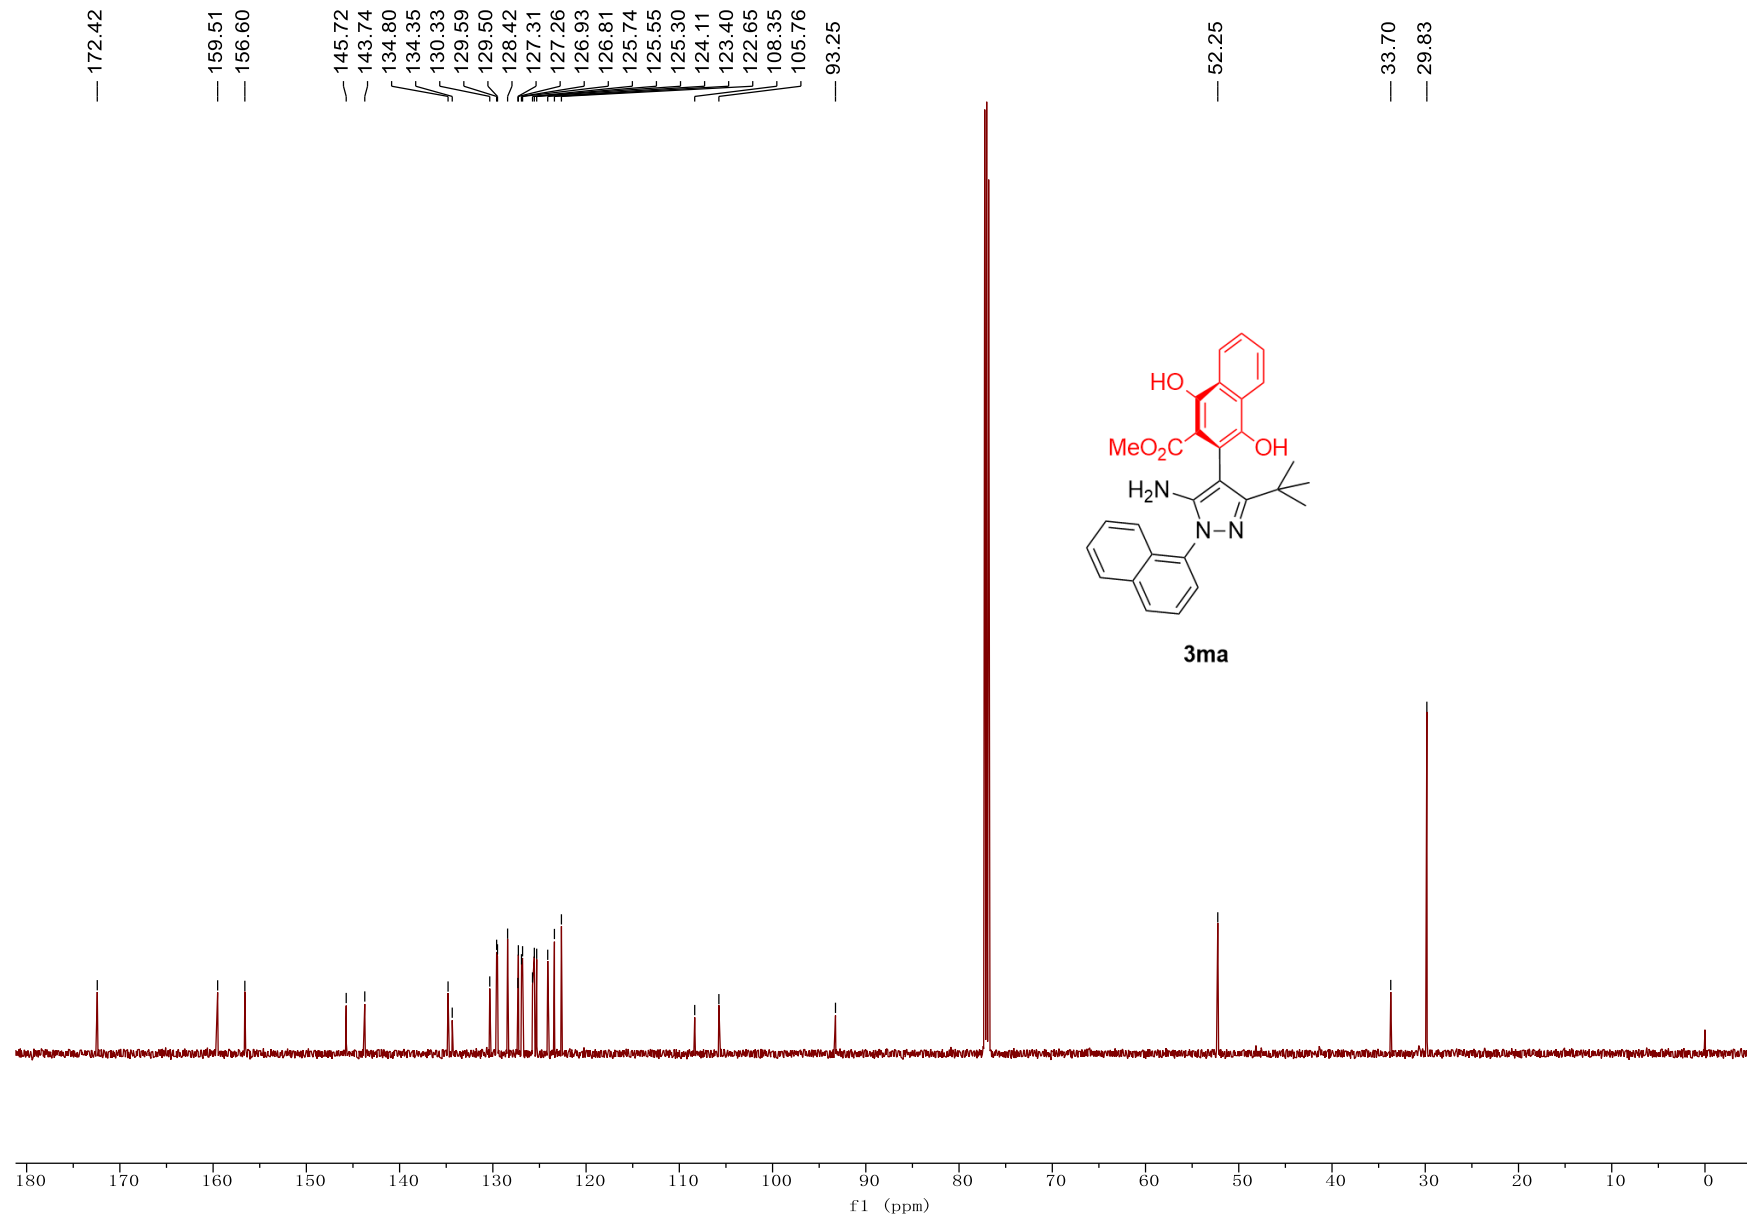

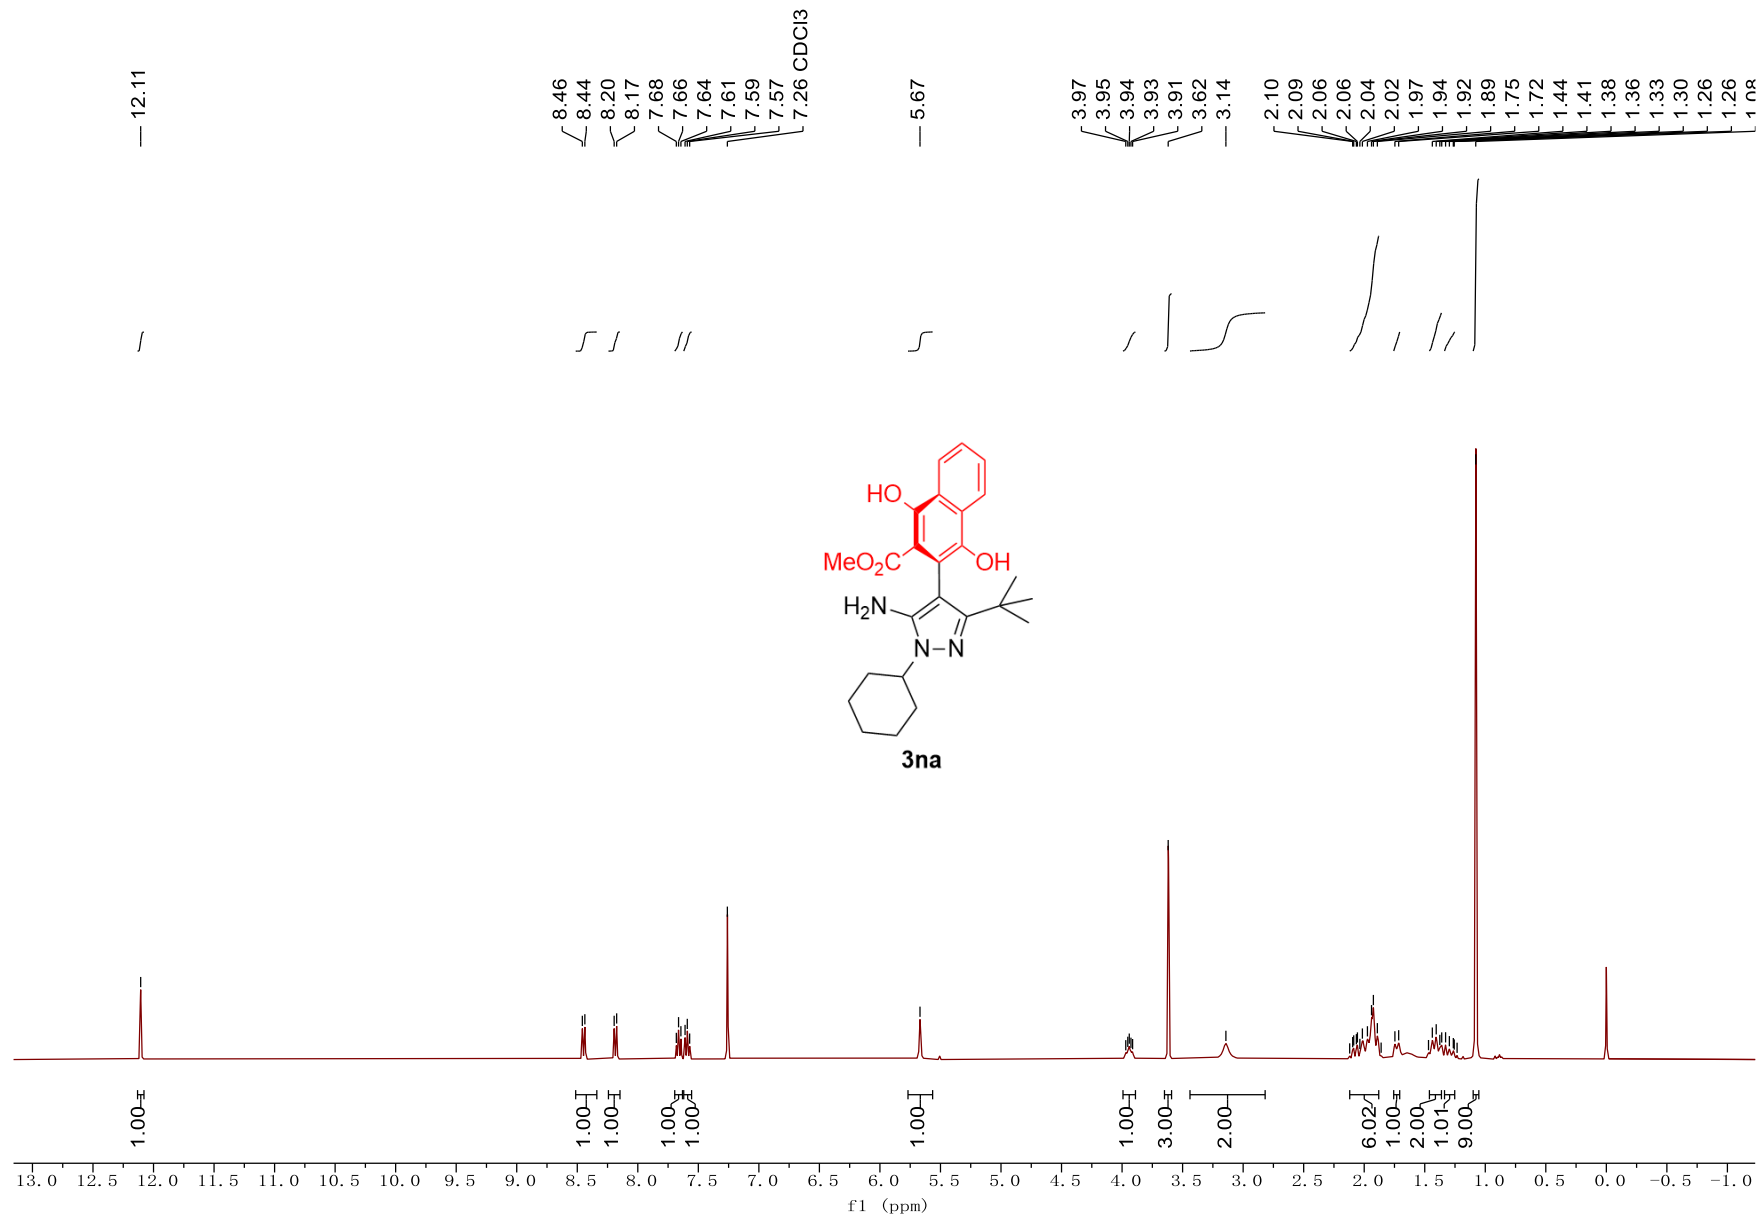

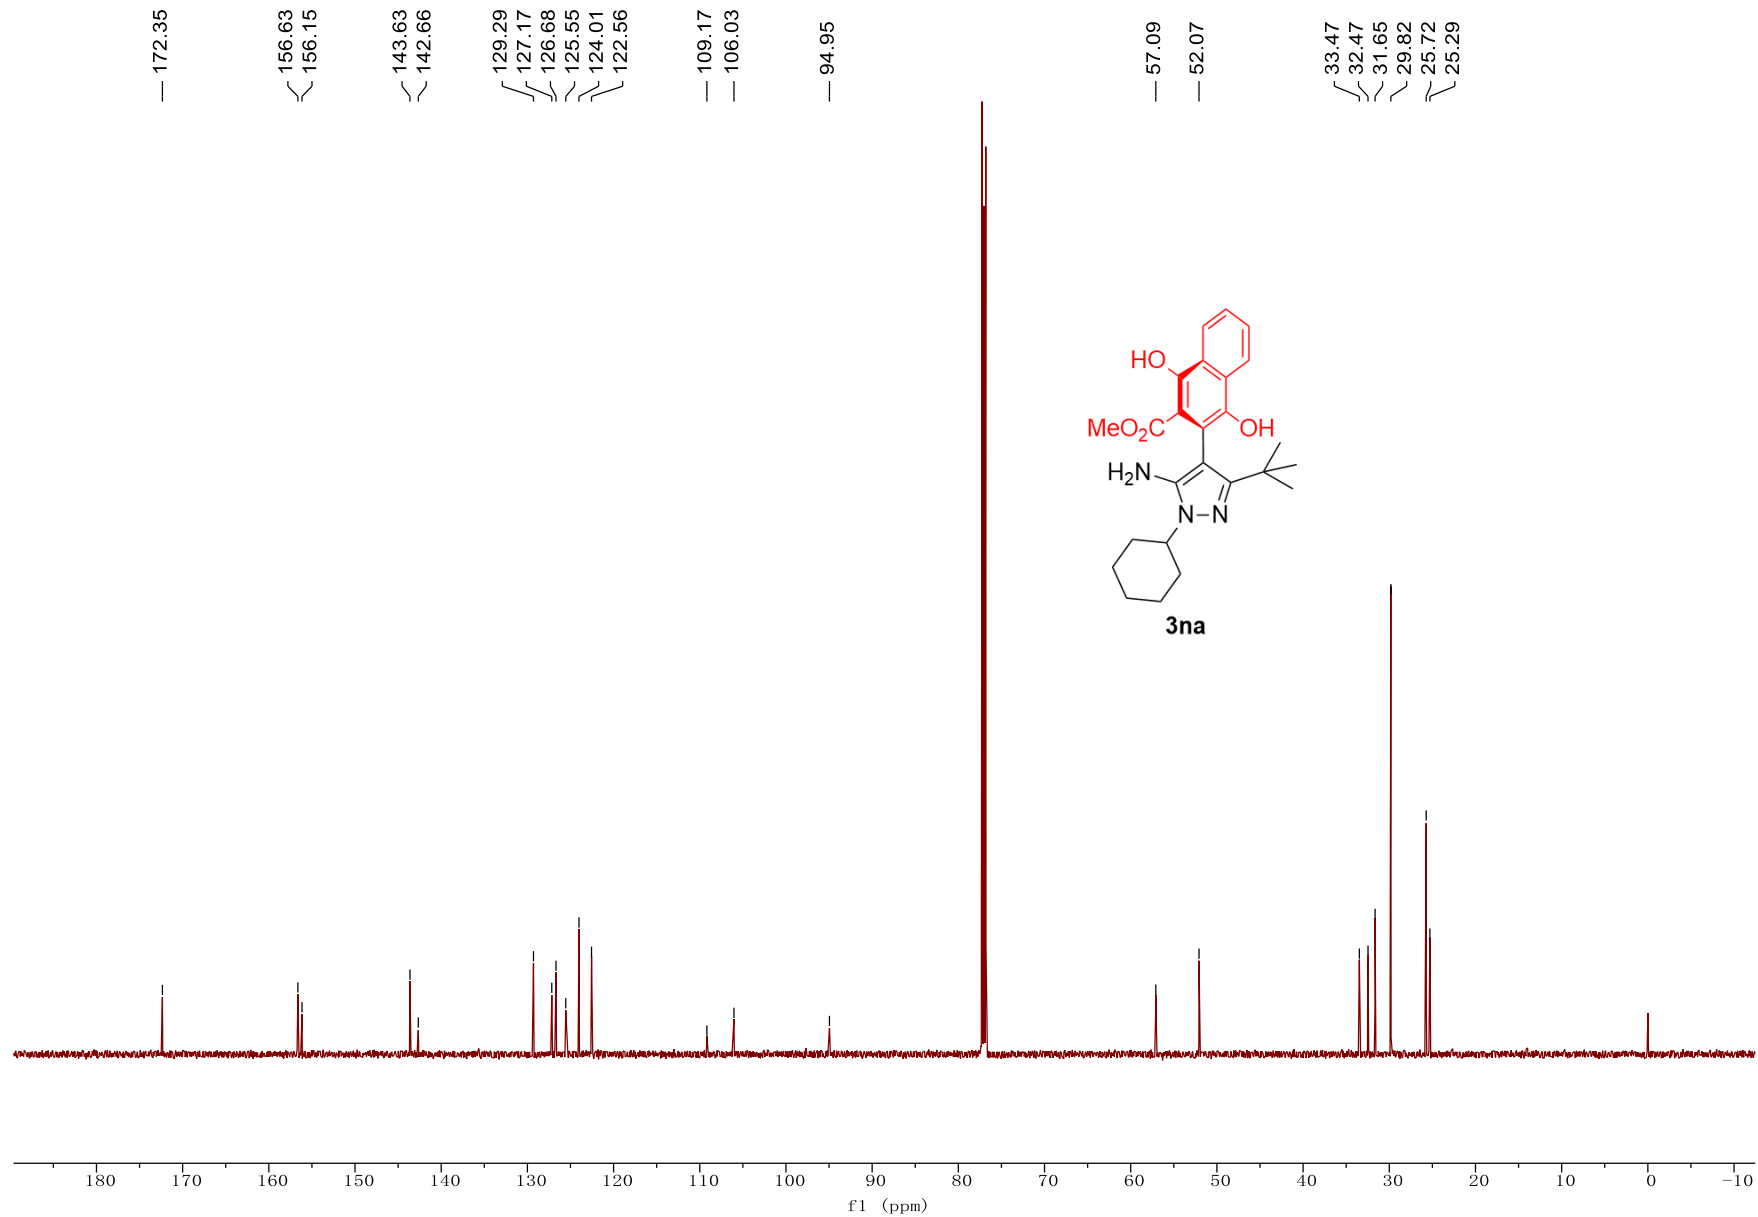

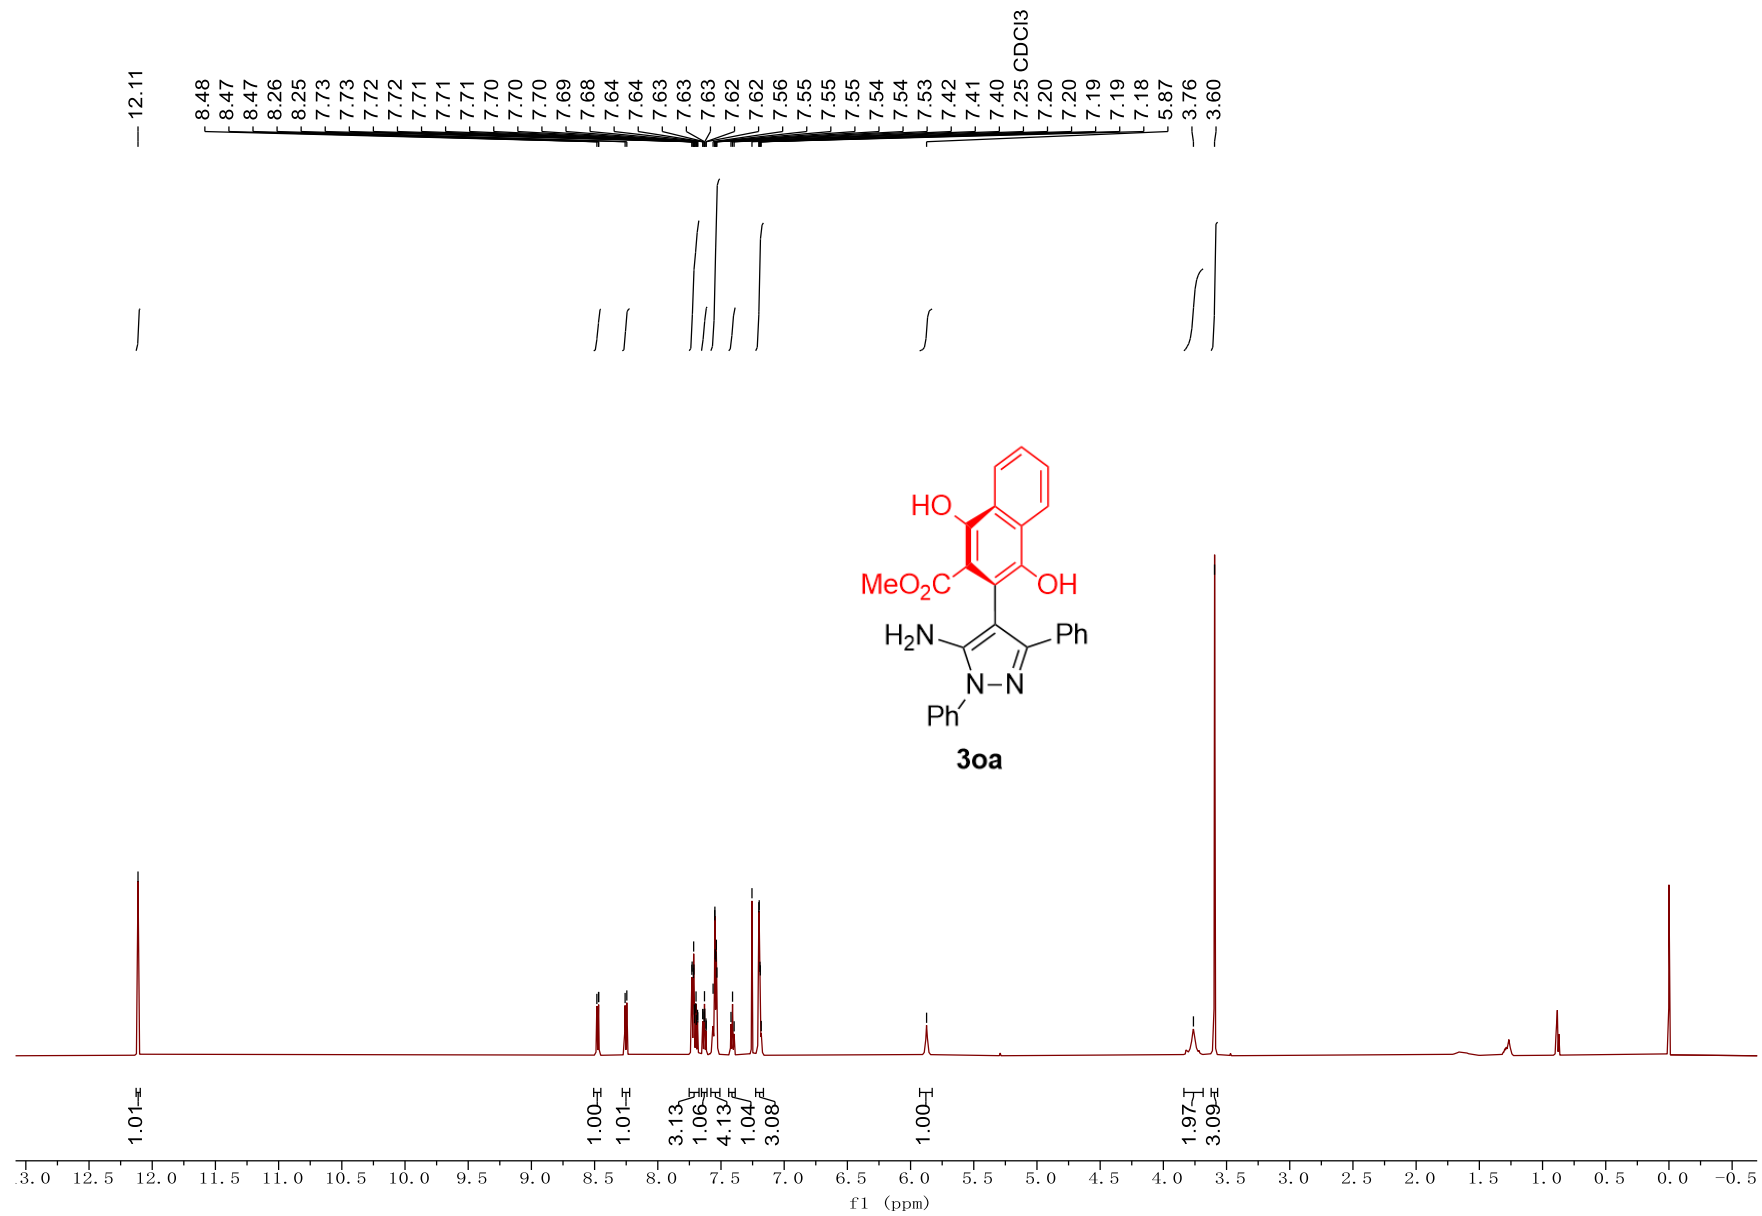

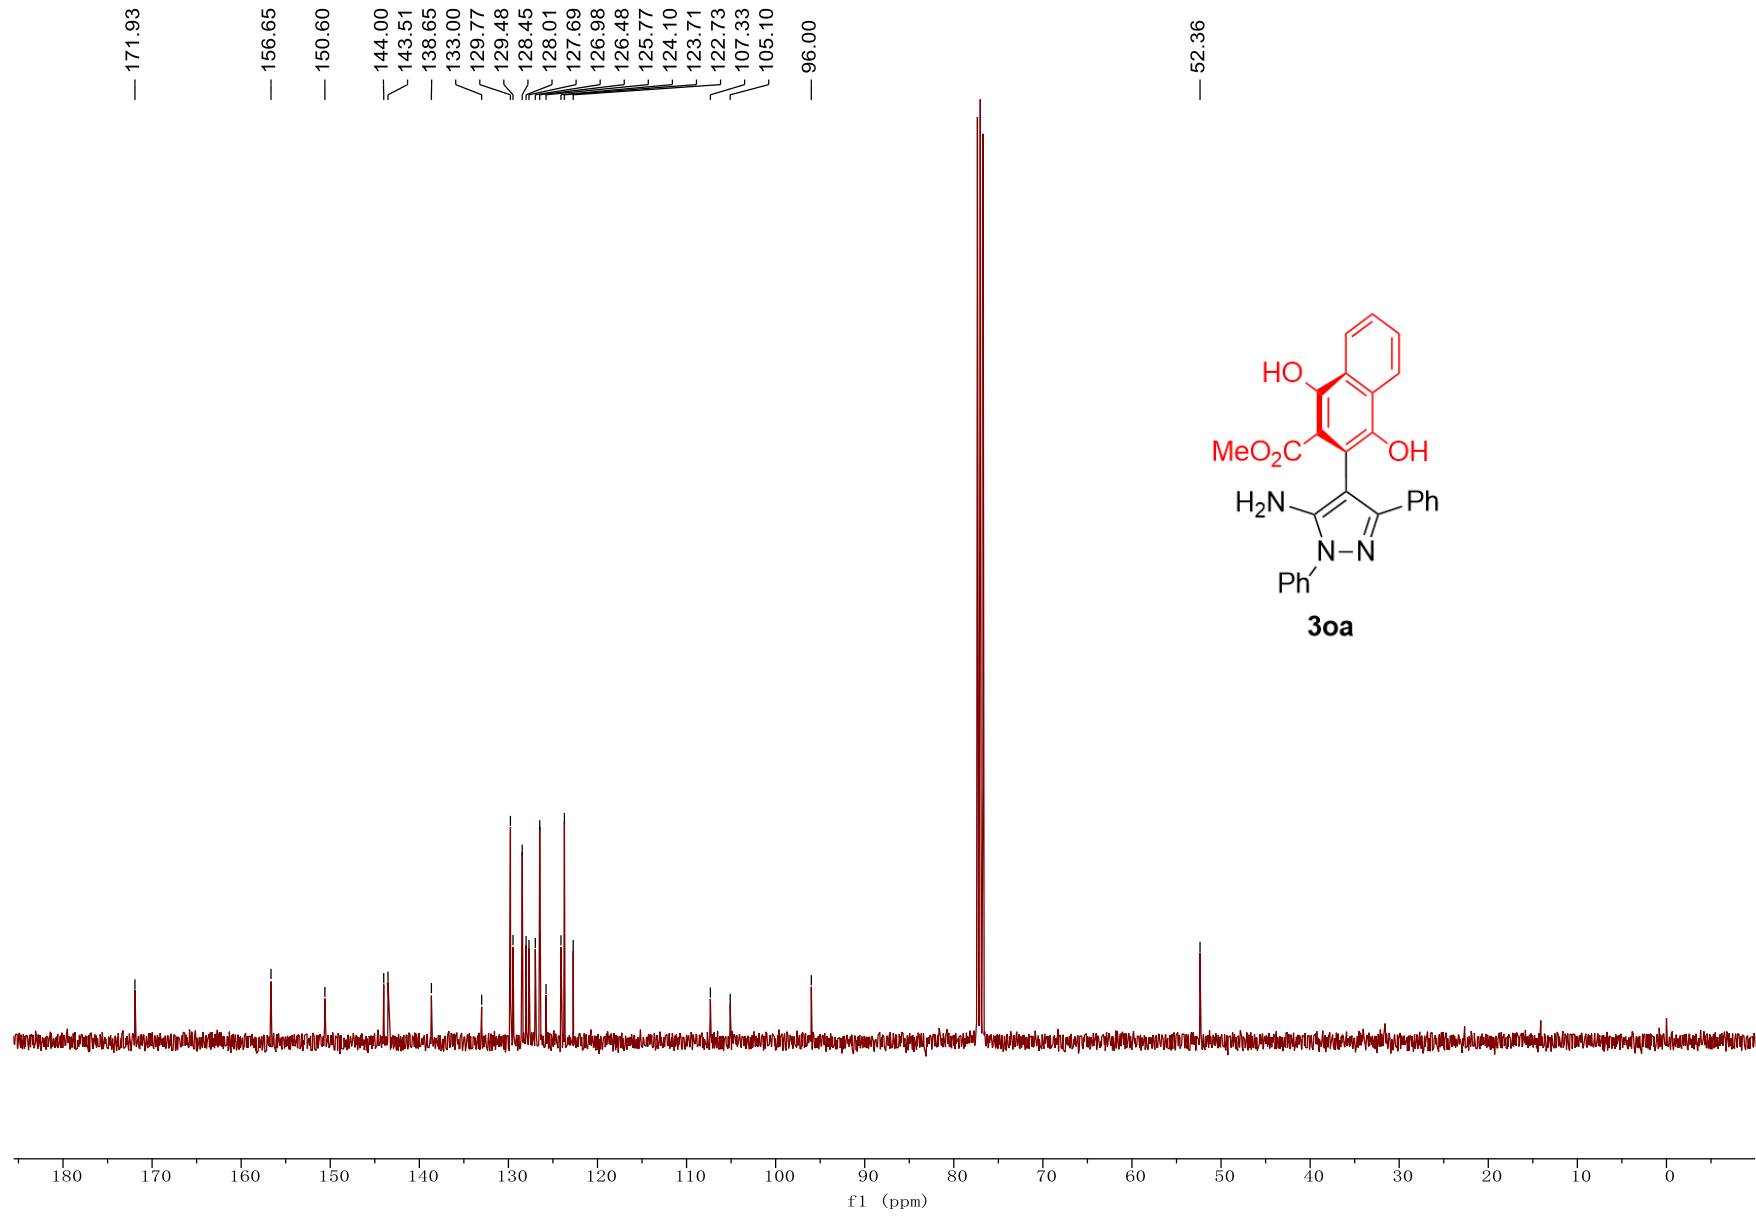

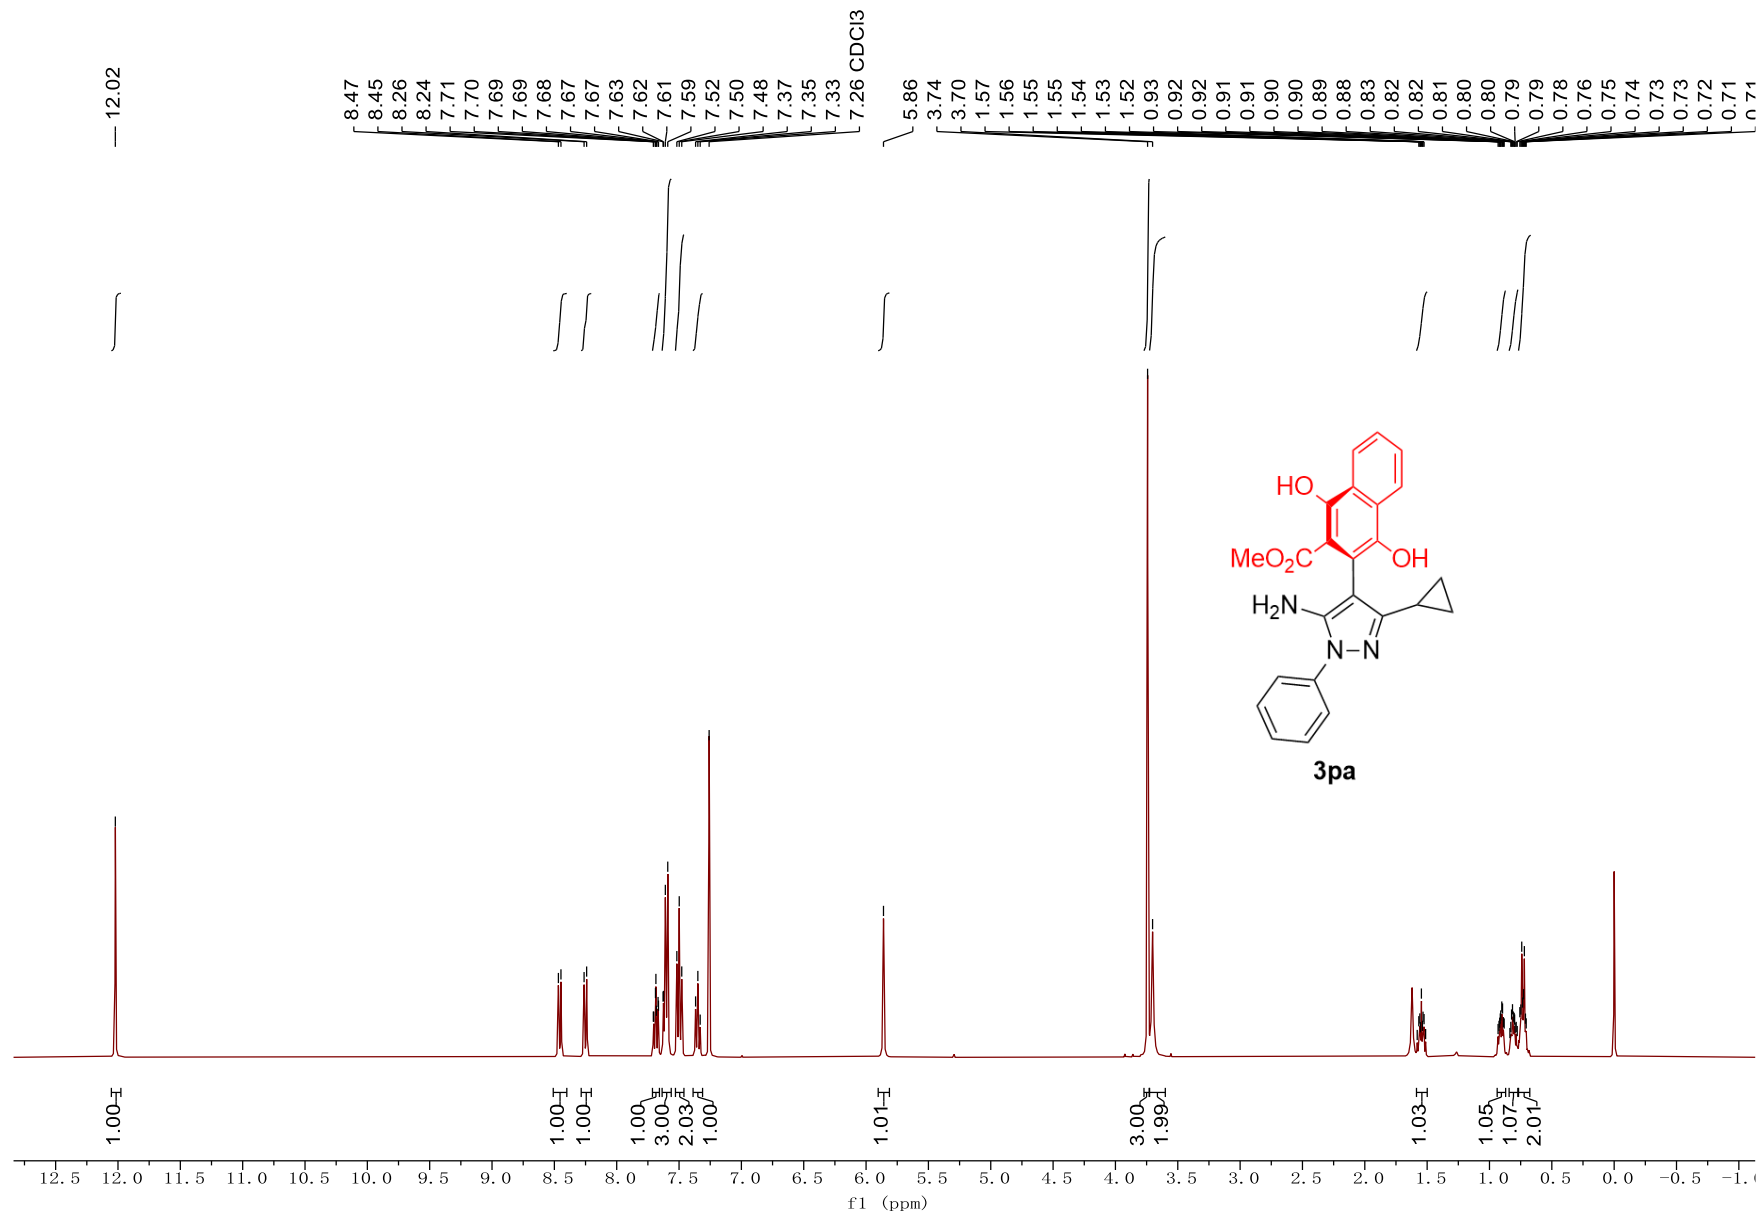

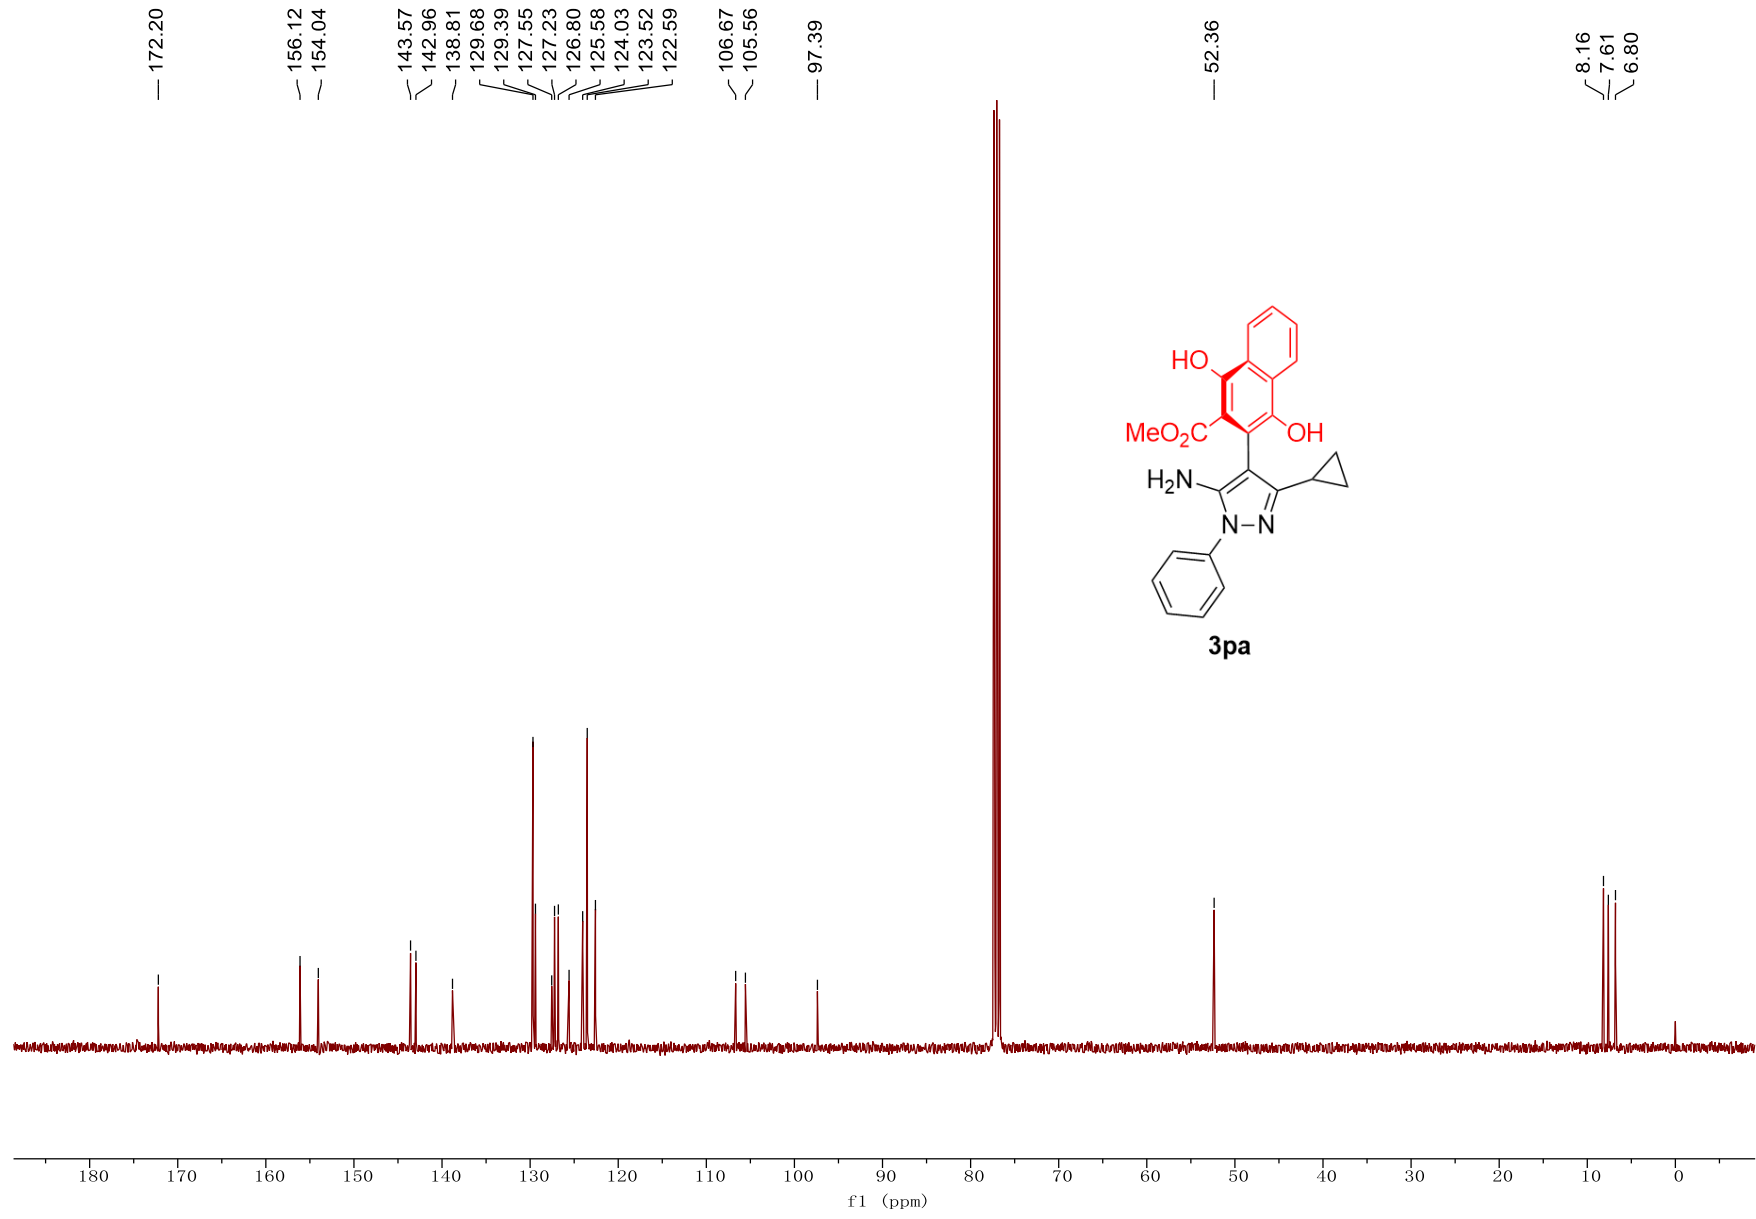

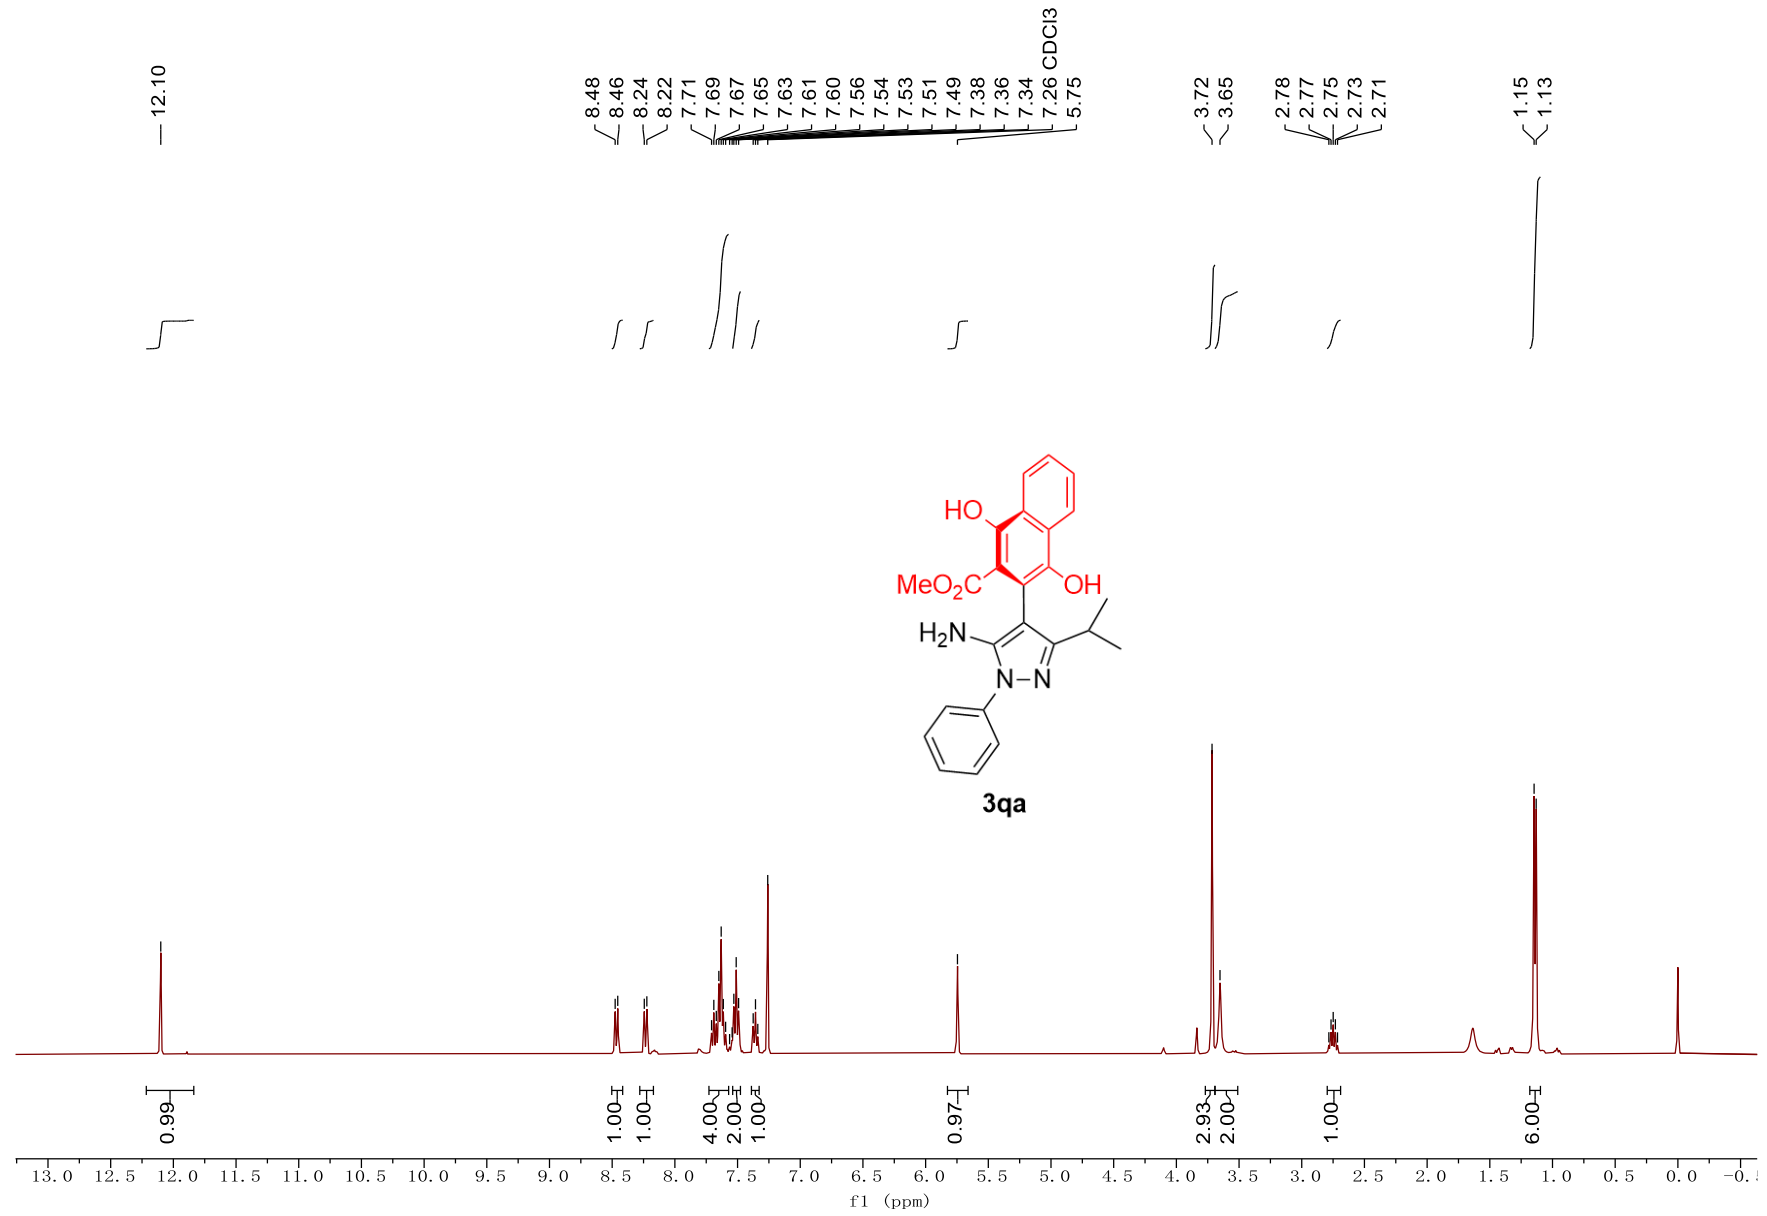



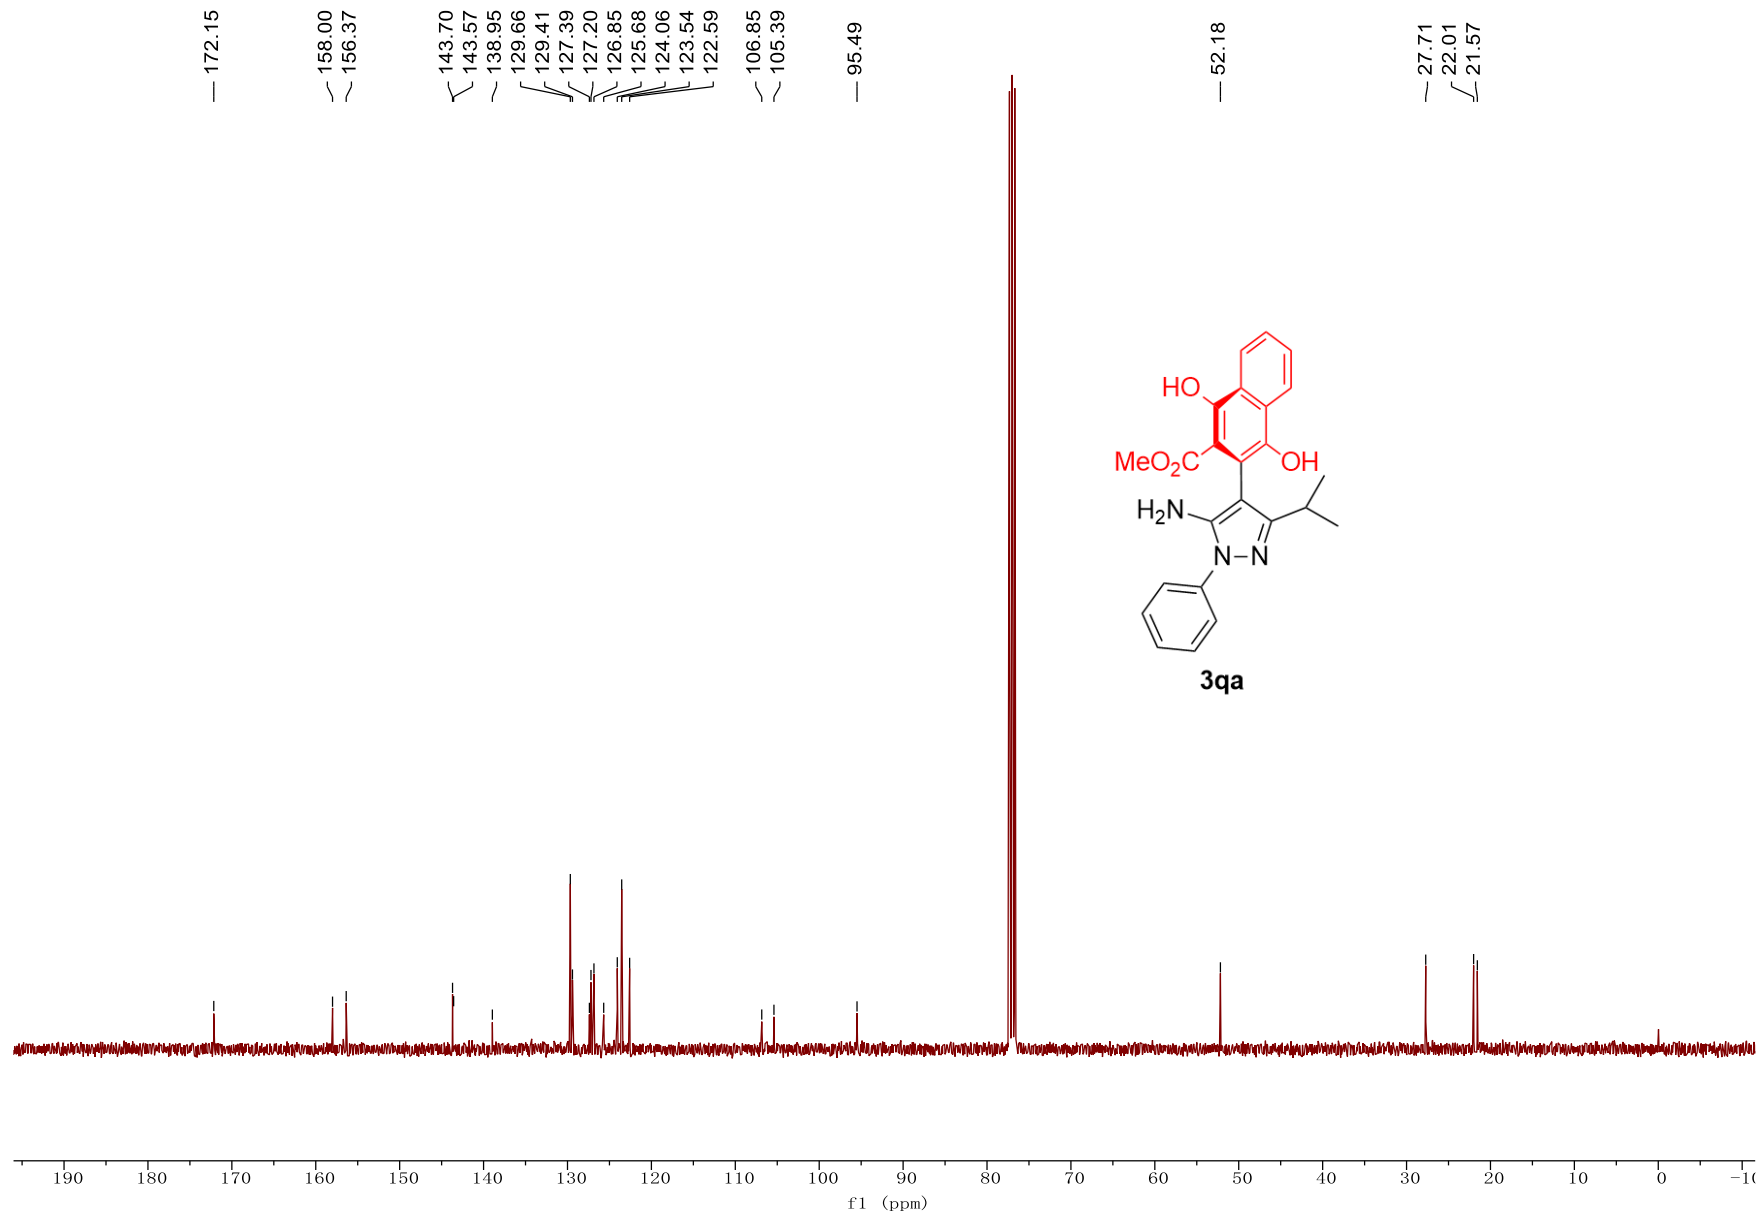

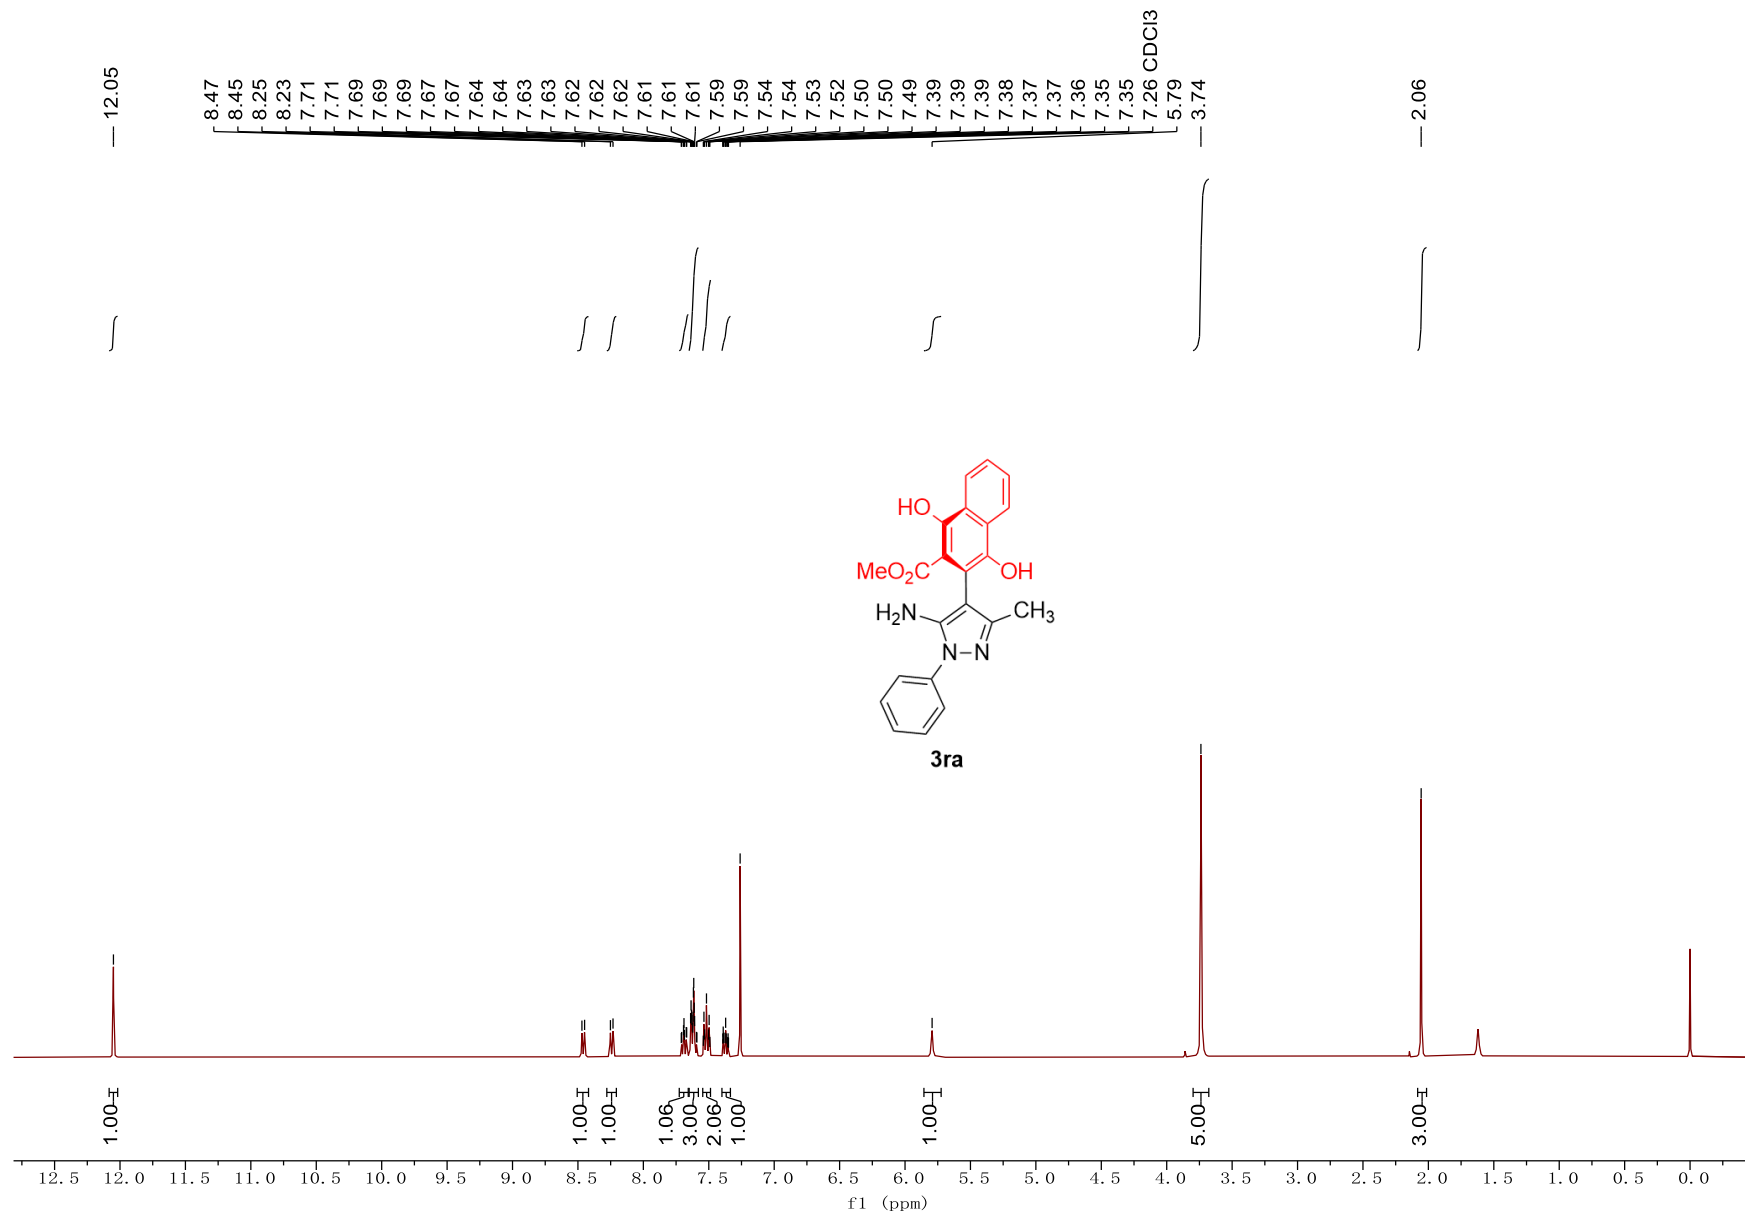

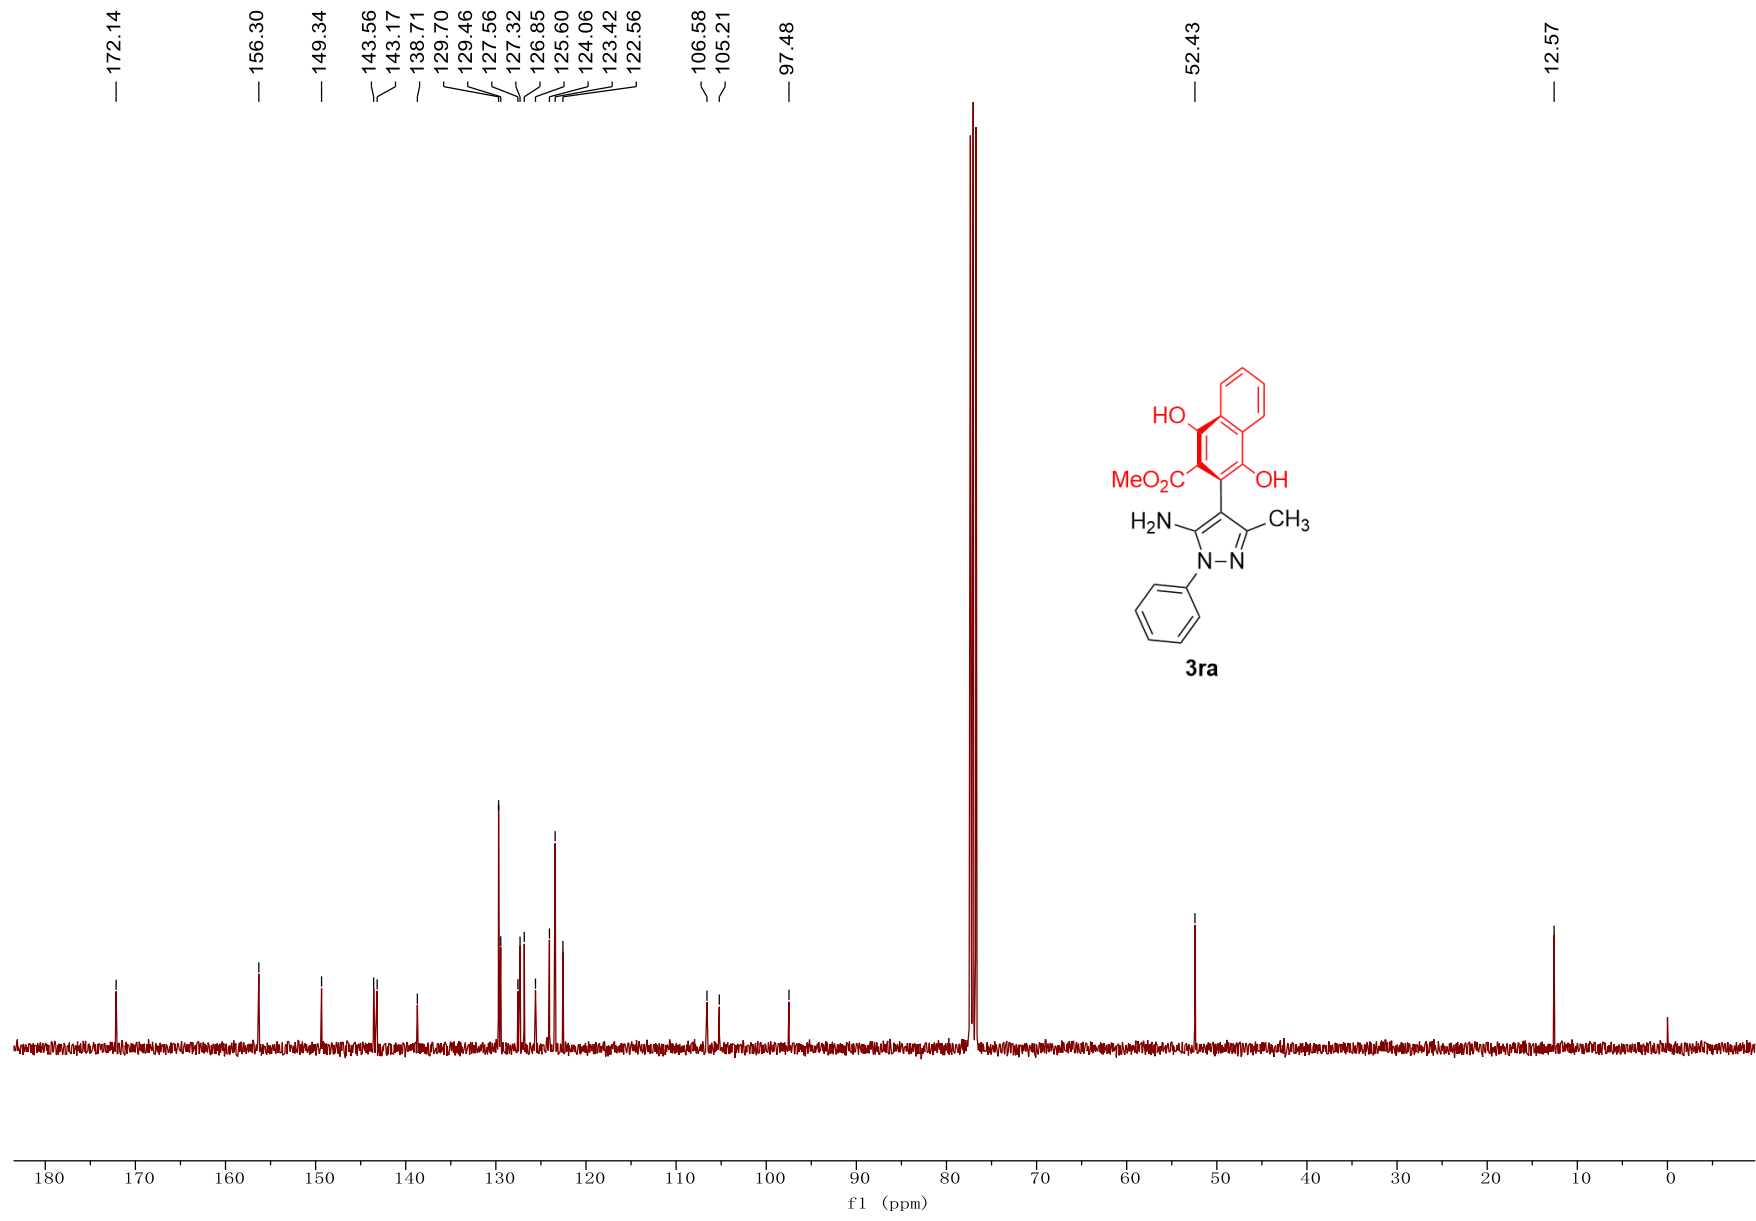

— 172.14

— 156.30

— 149.34

143.56

143.17

138.71

129.70

129.46

127.56

127.32

126.85

125.60

124.06

123.42

122.56

106.58

105.21

— 97.48

— 52.43

— 12.57

f1 (ppm)

S 58

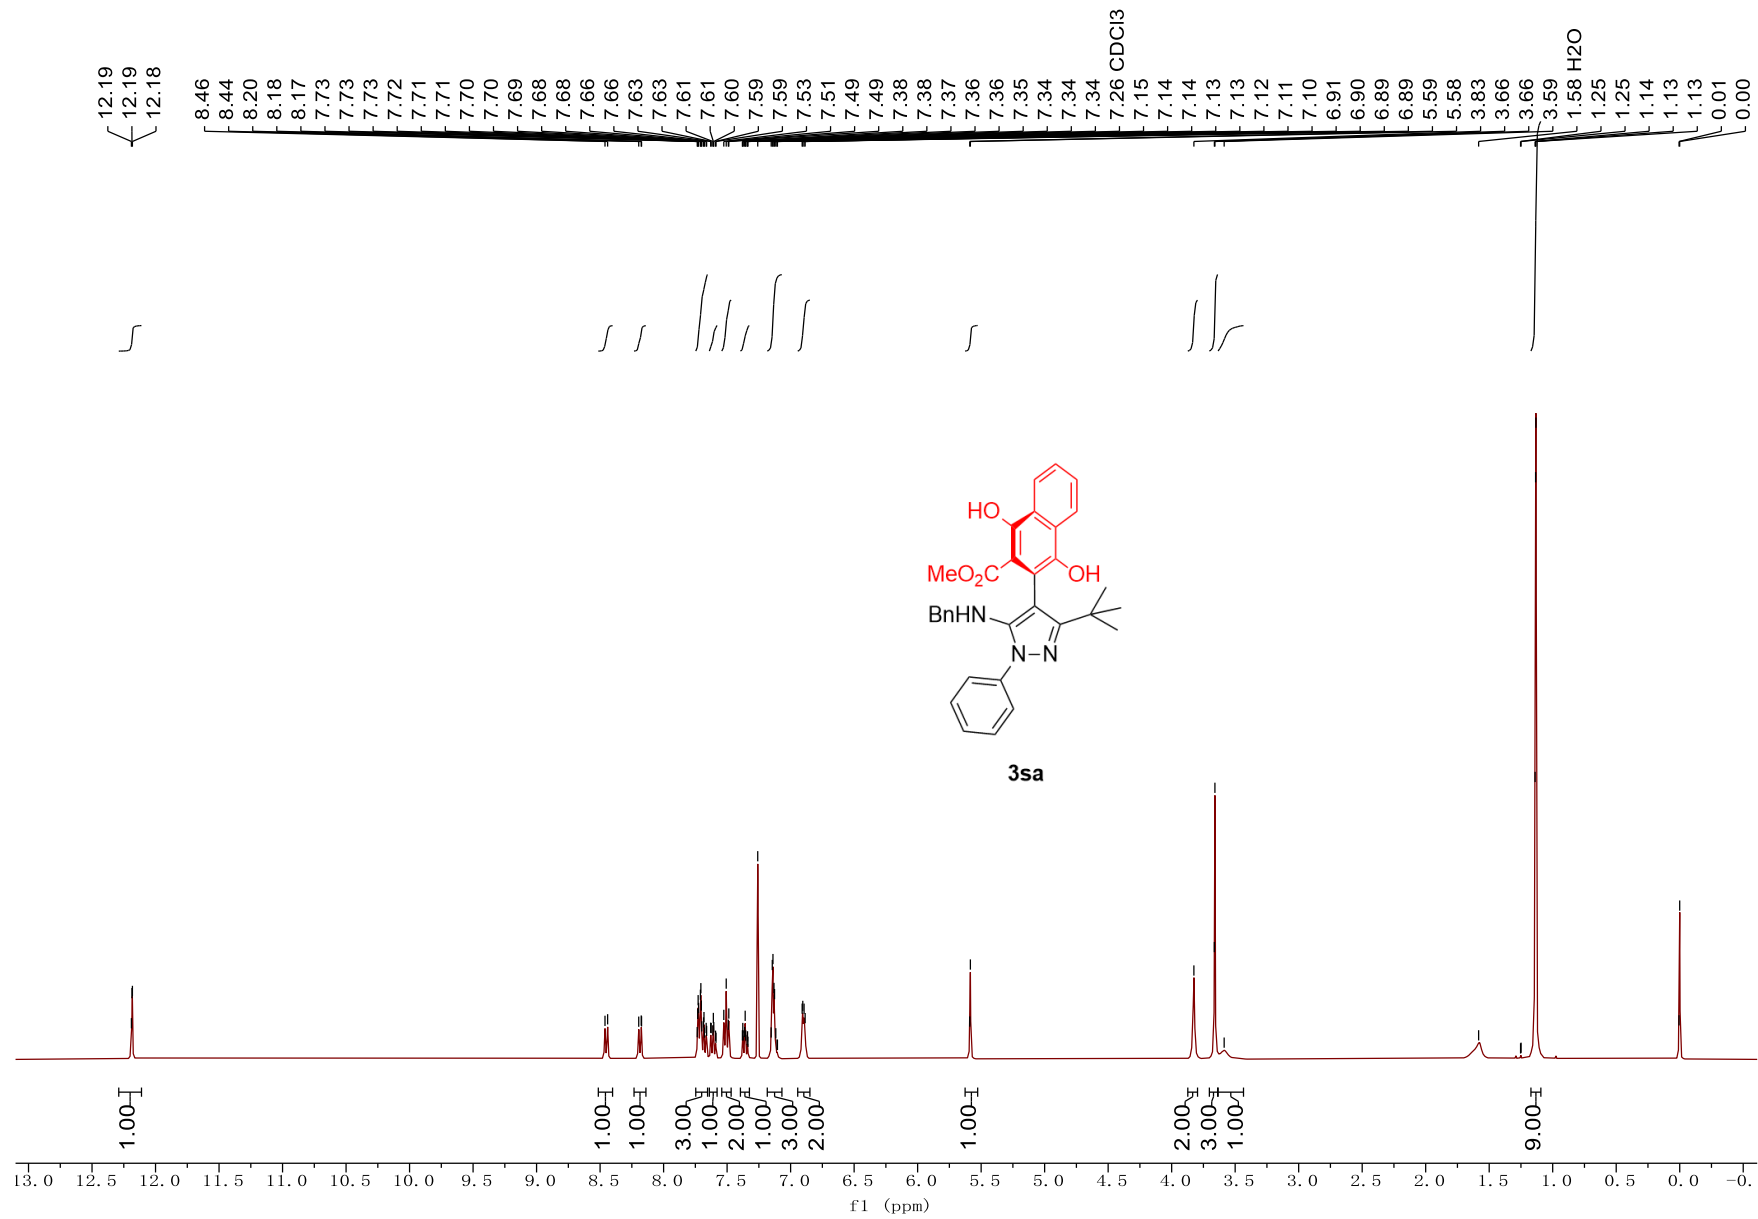

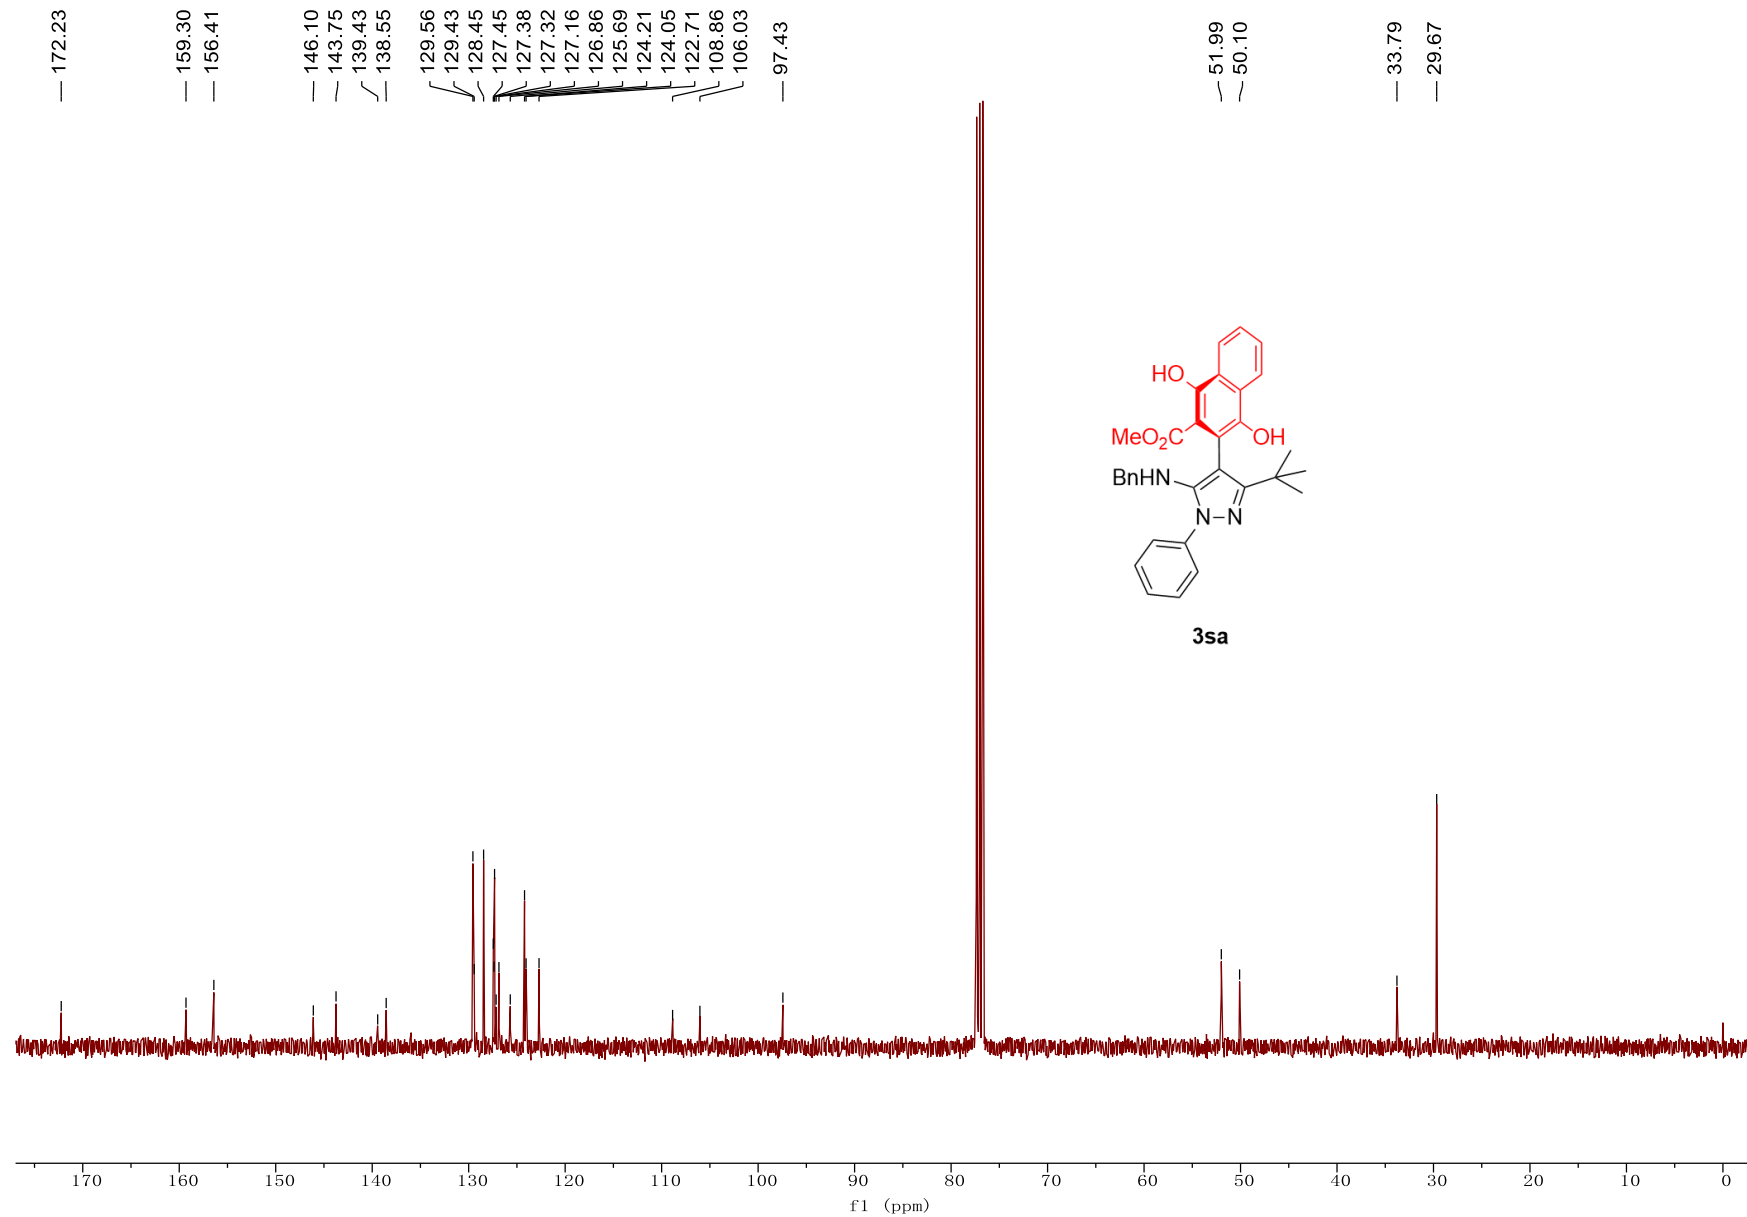

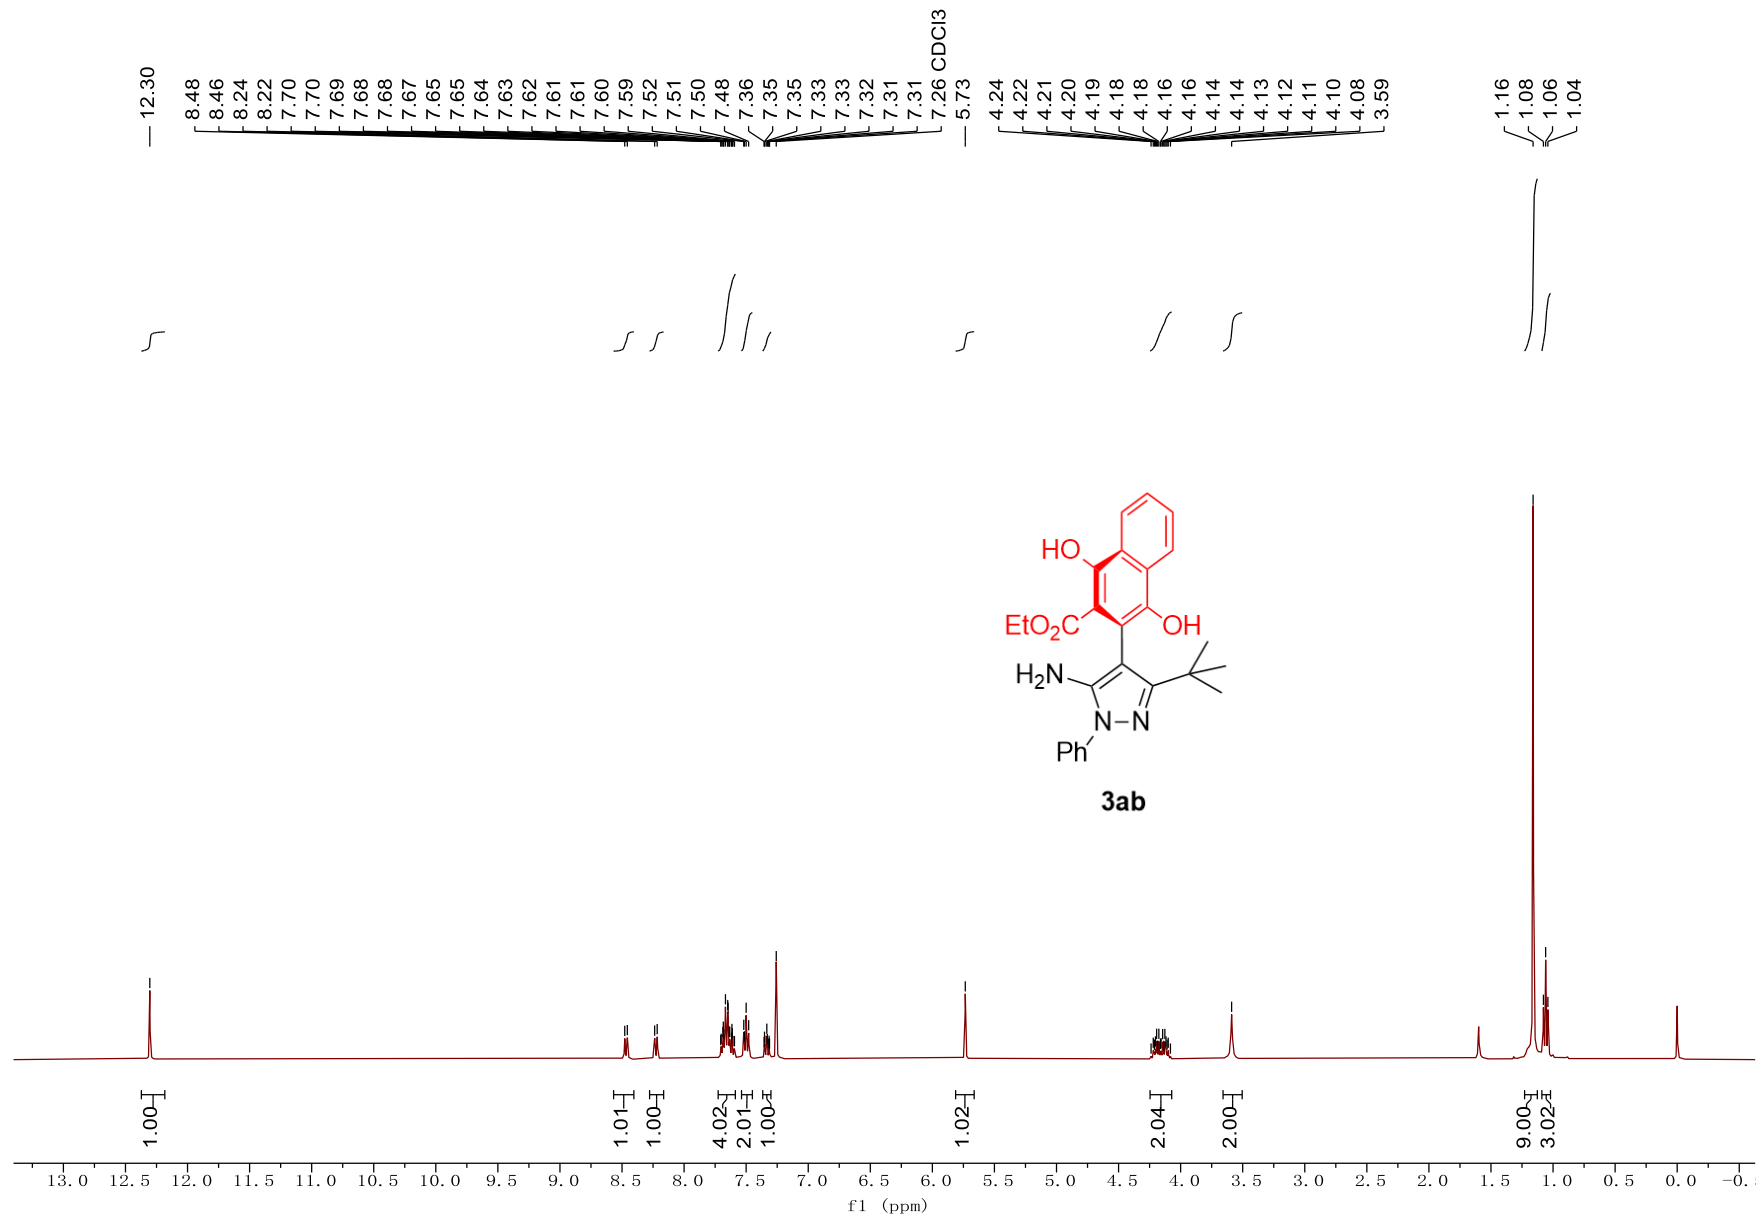

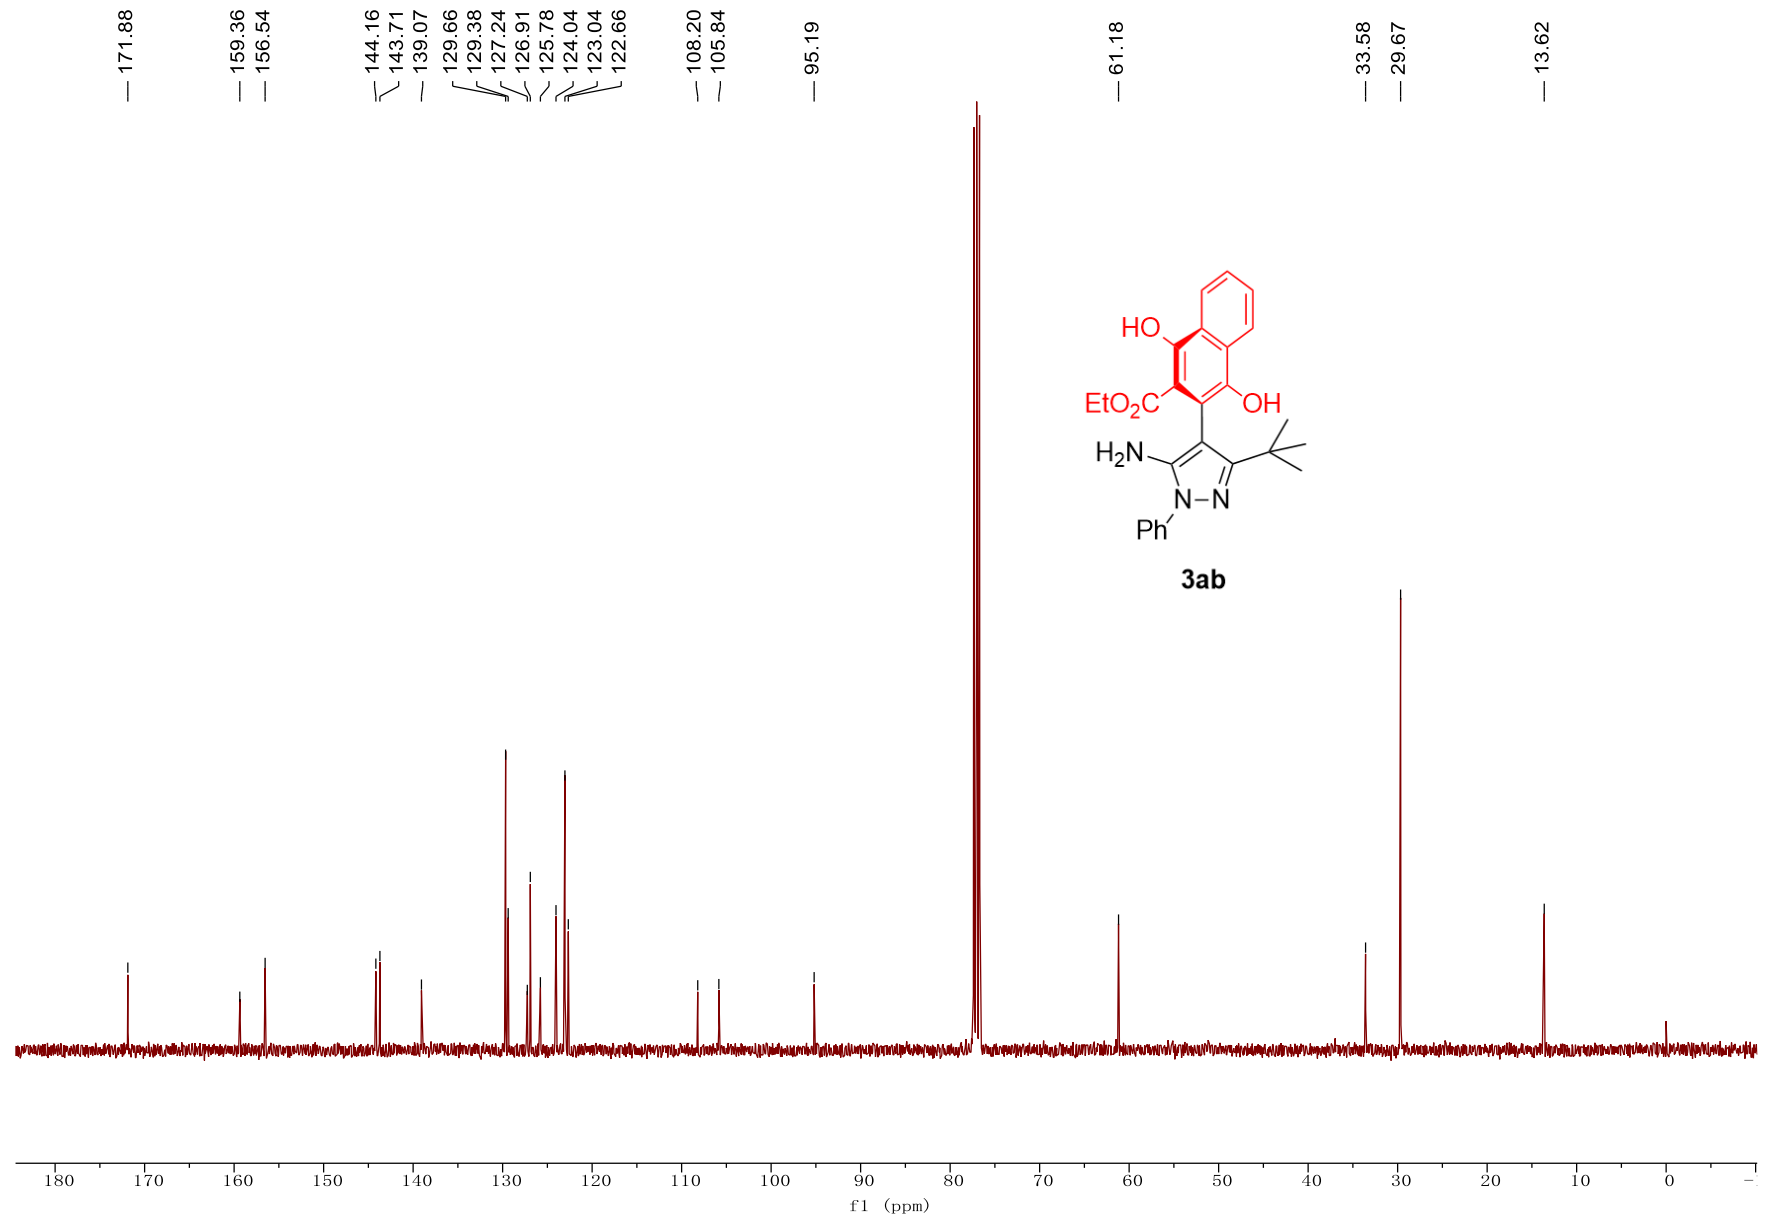

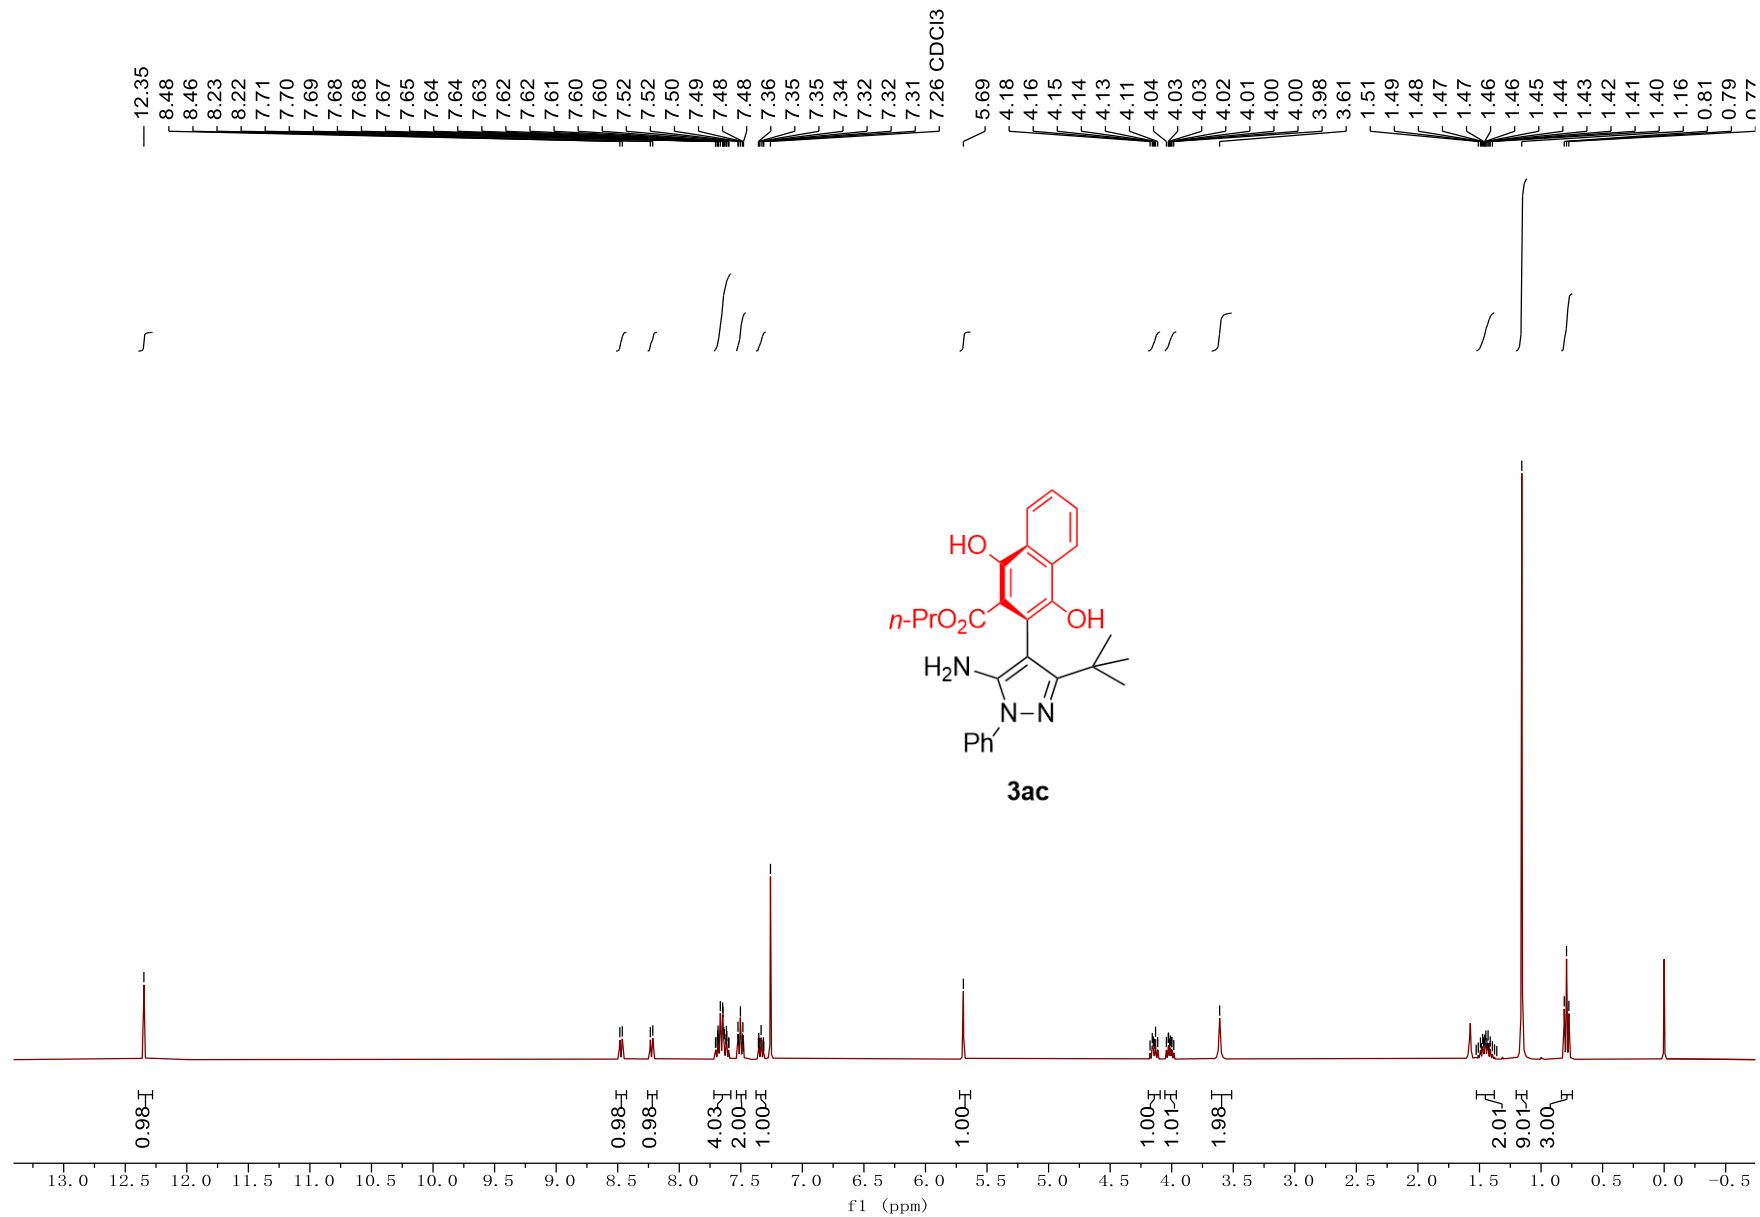



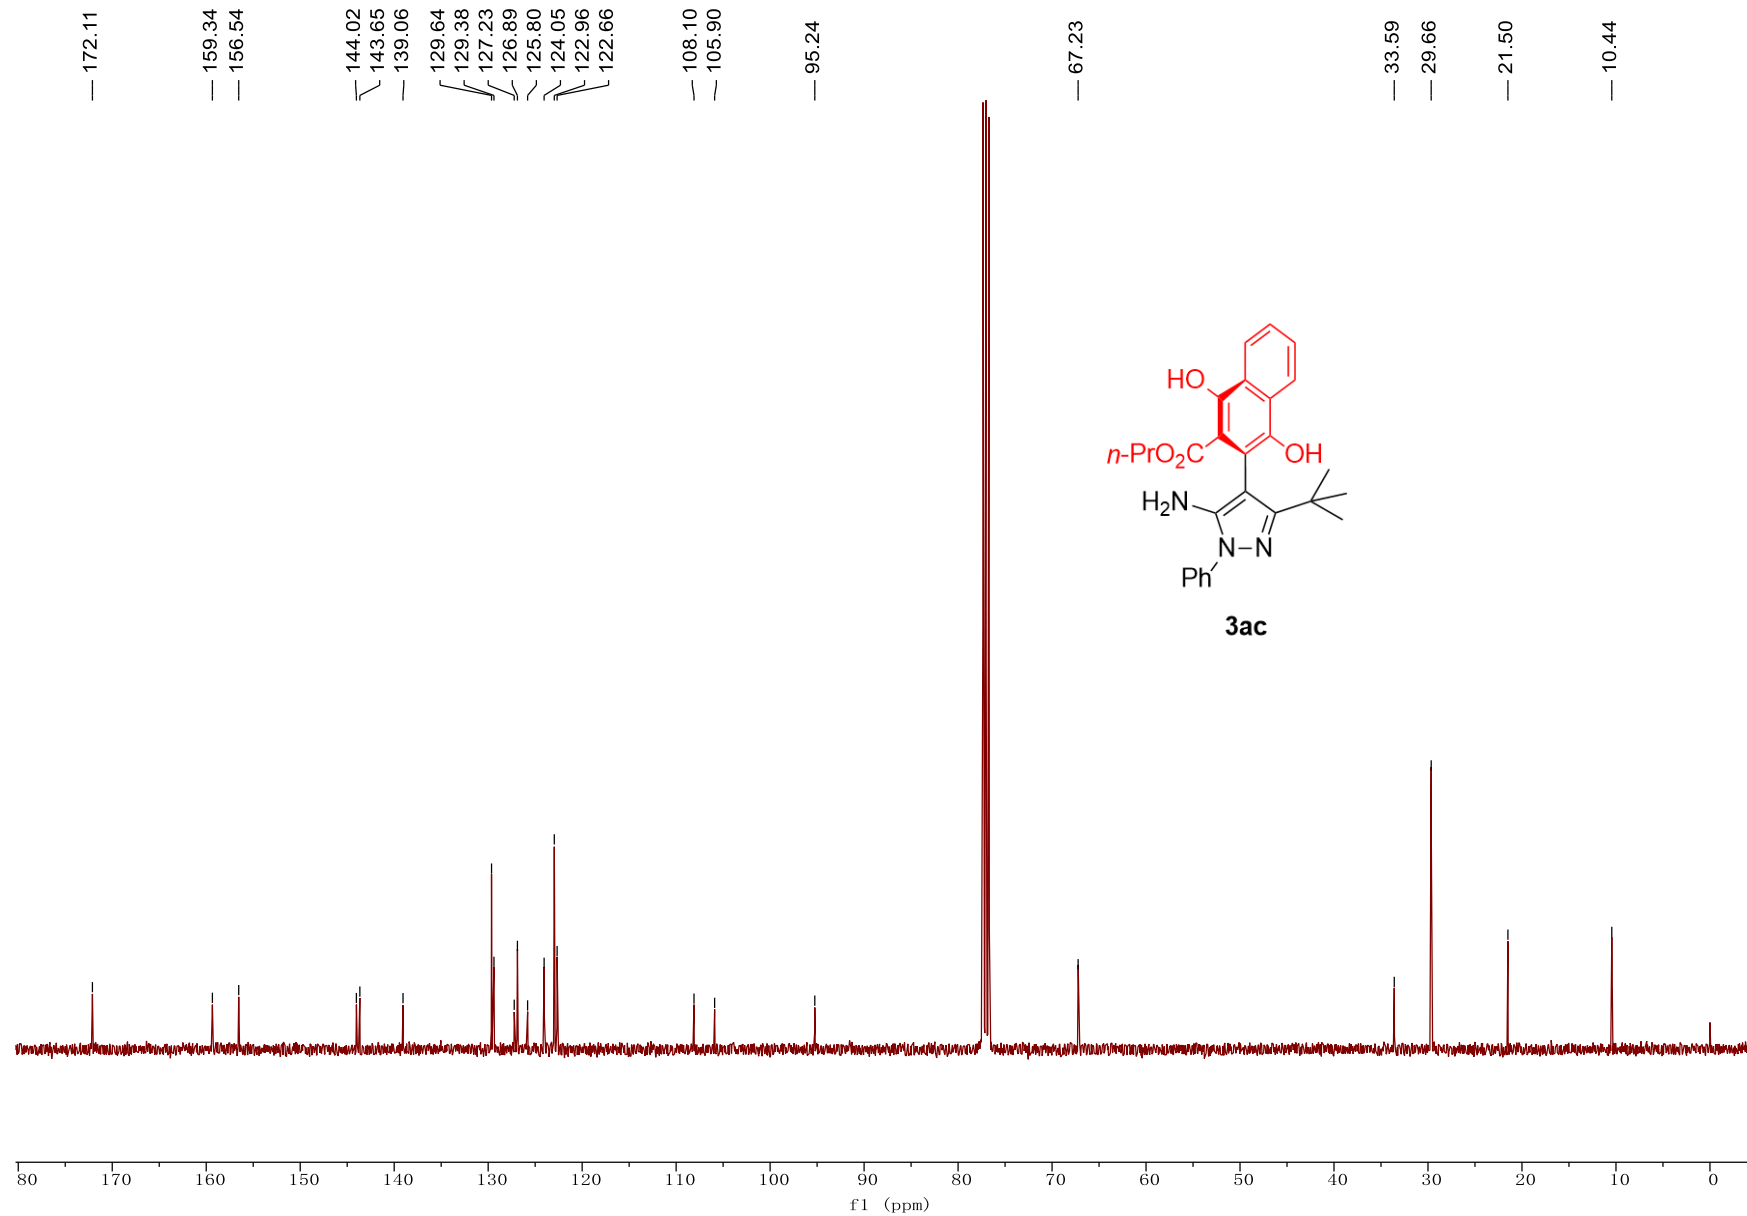

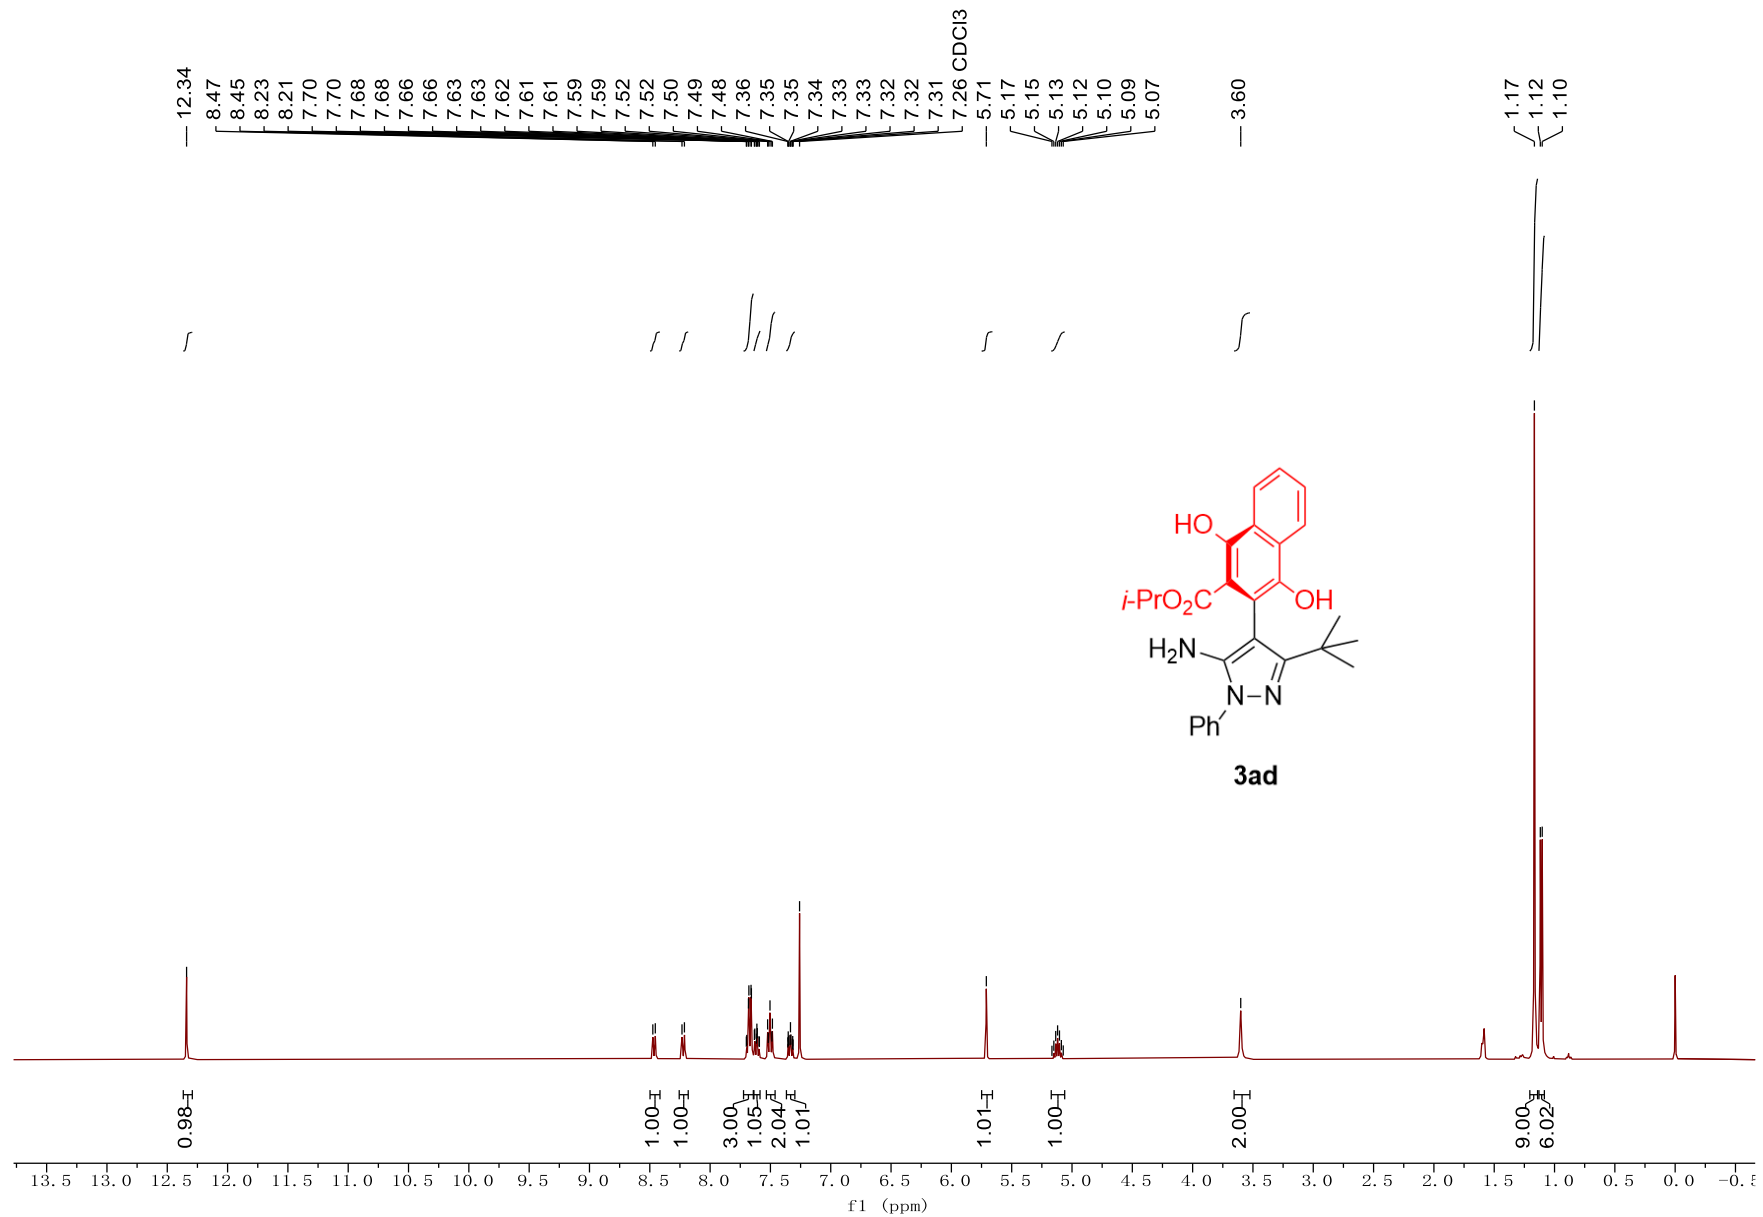

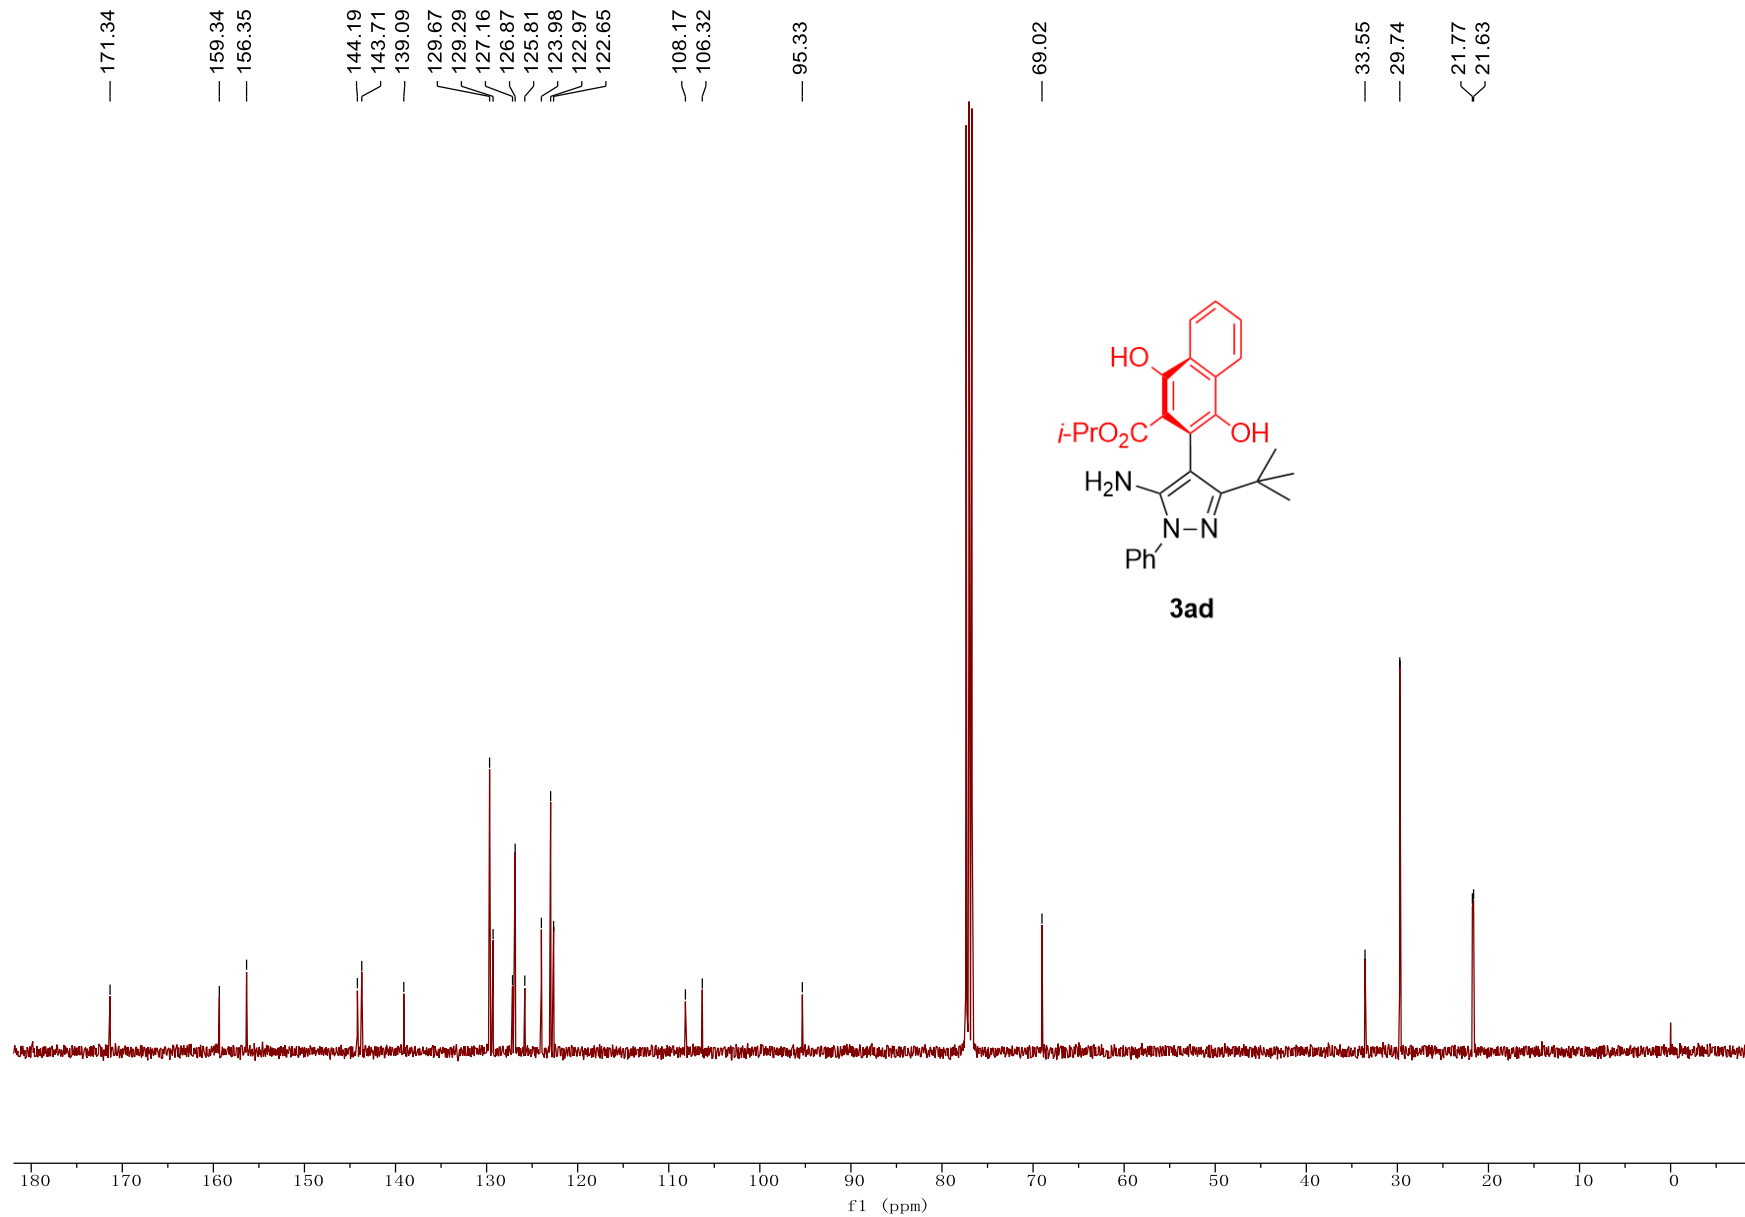

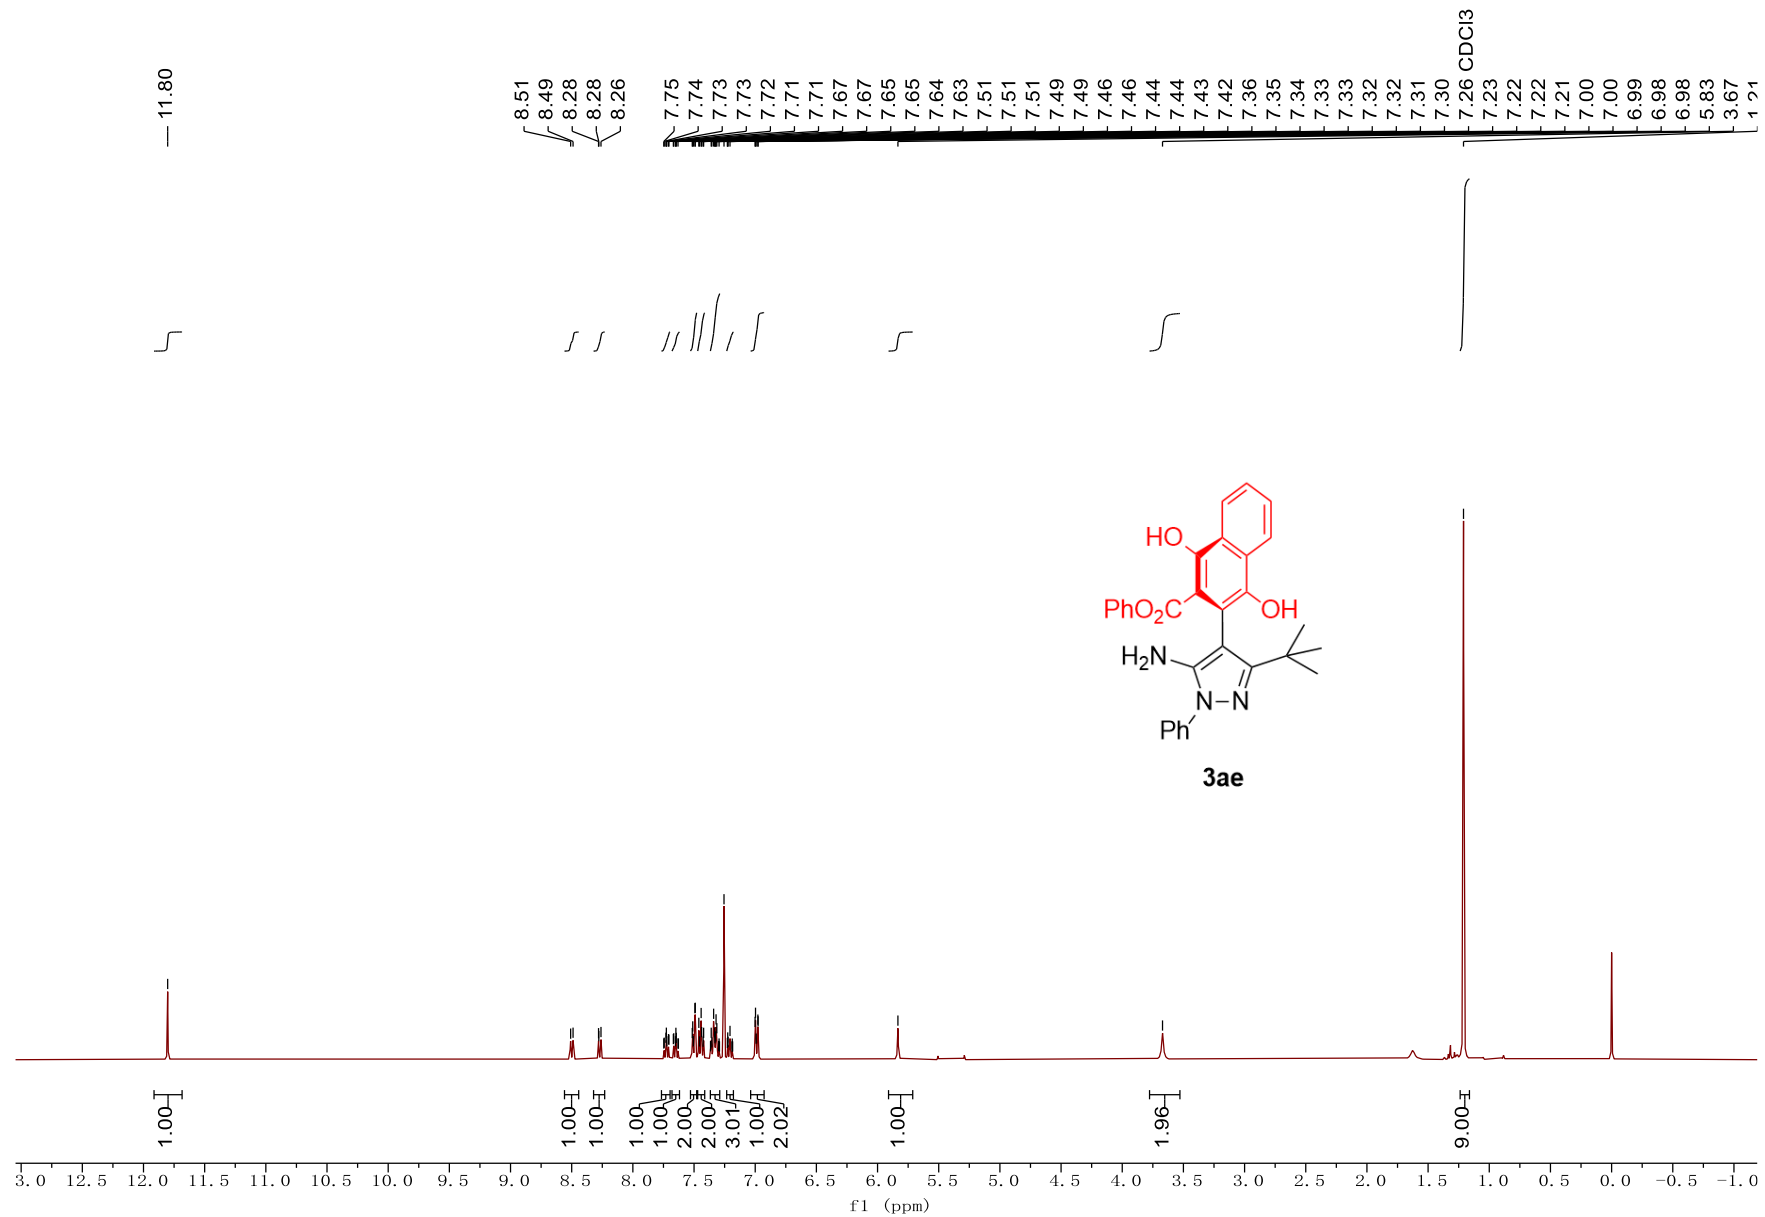

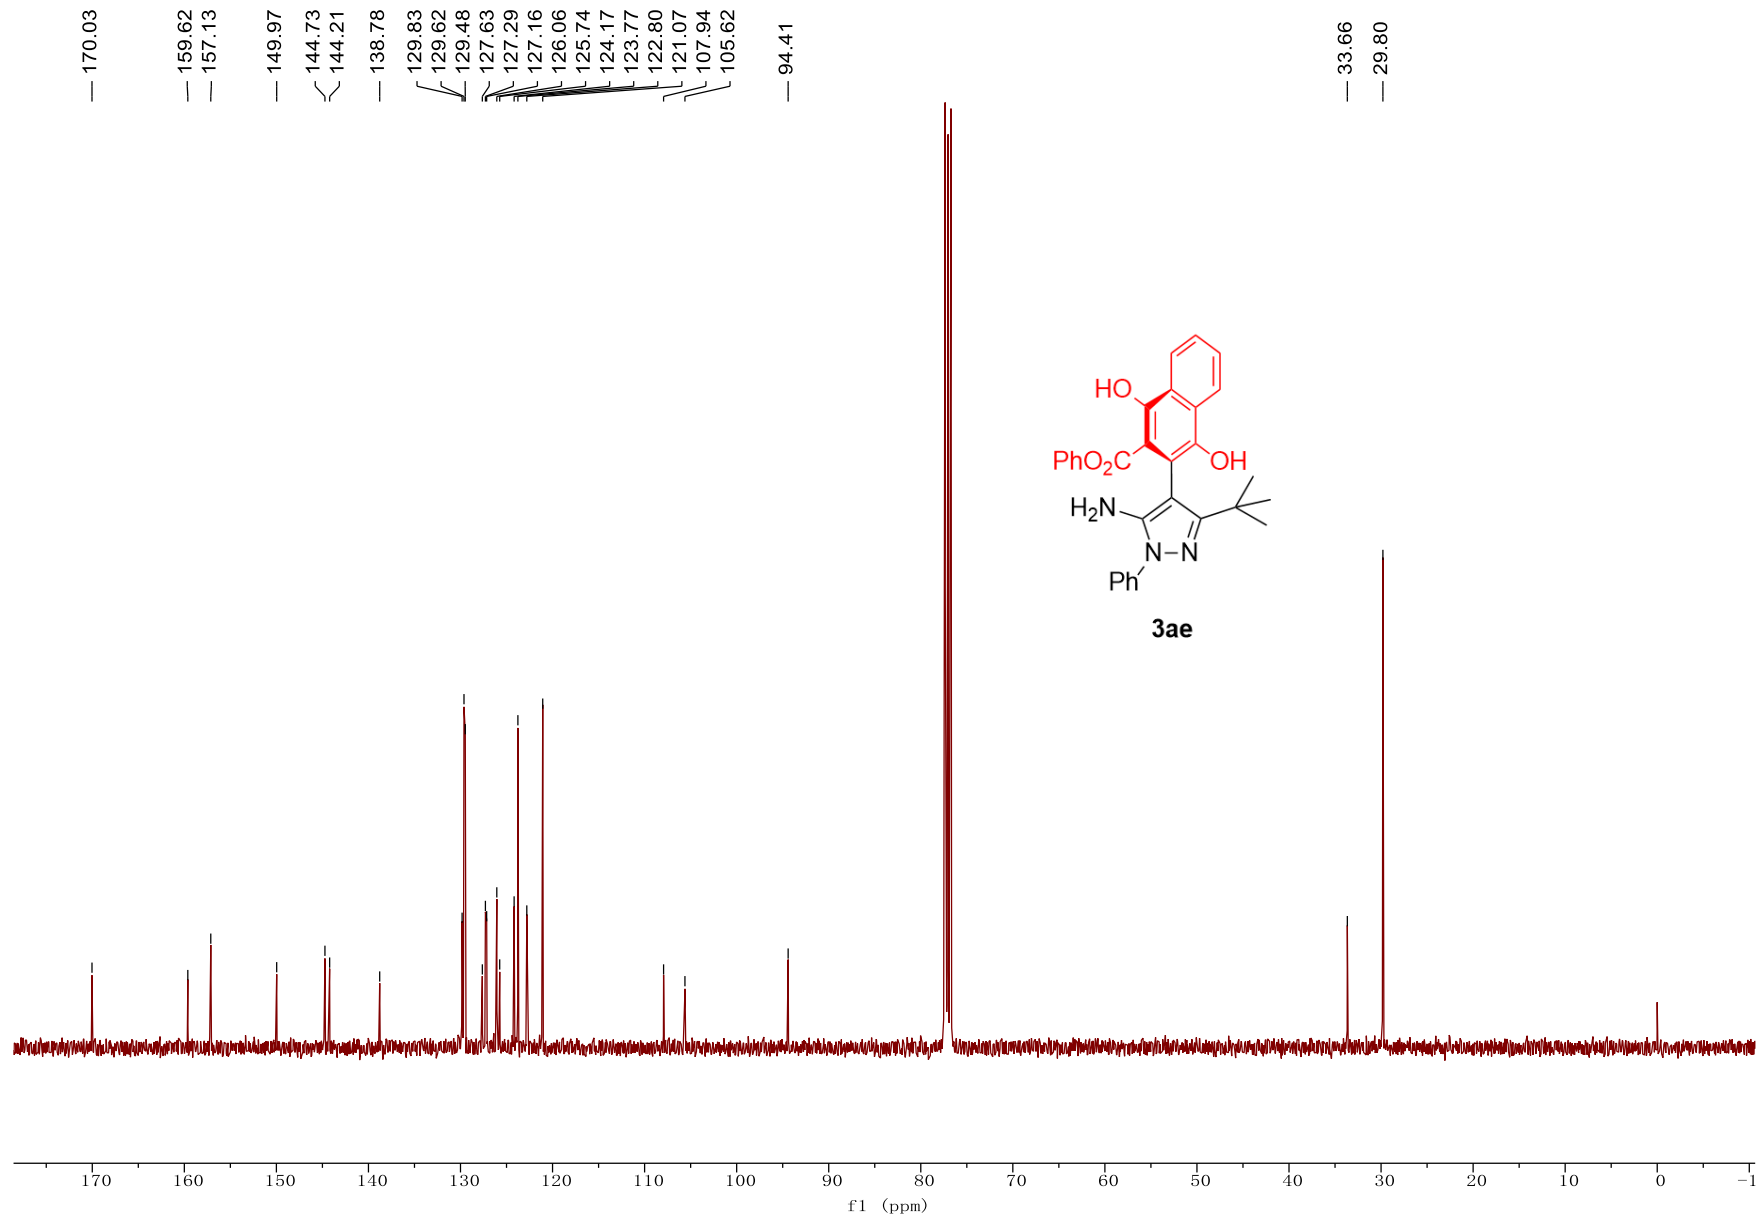

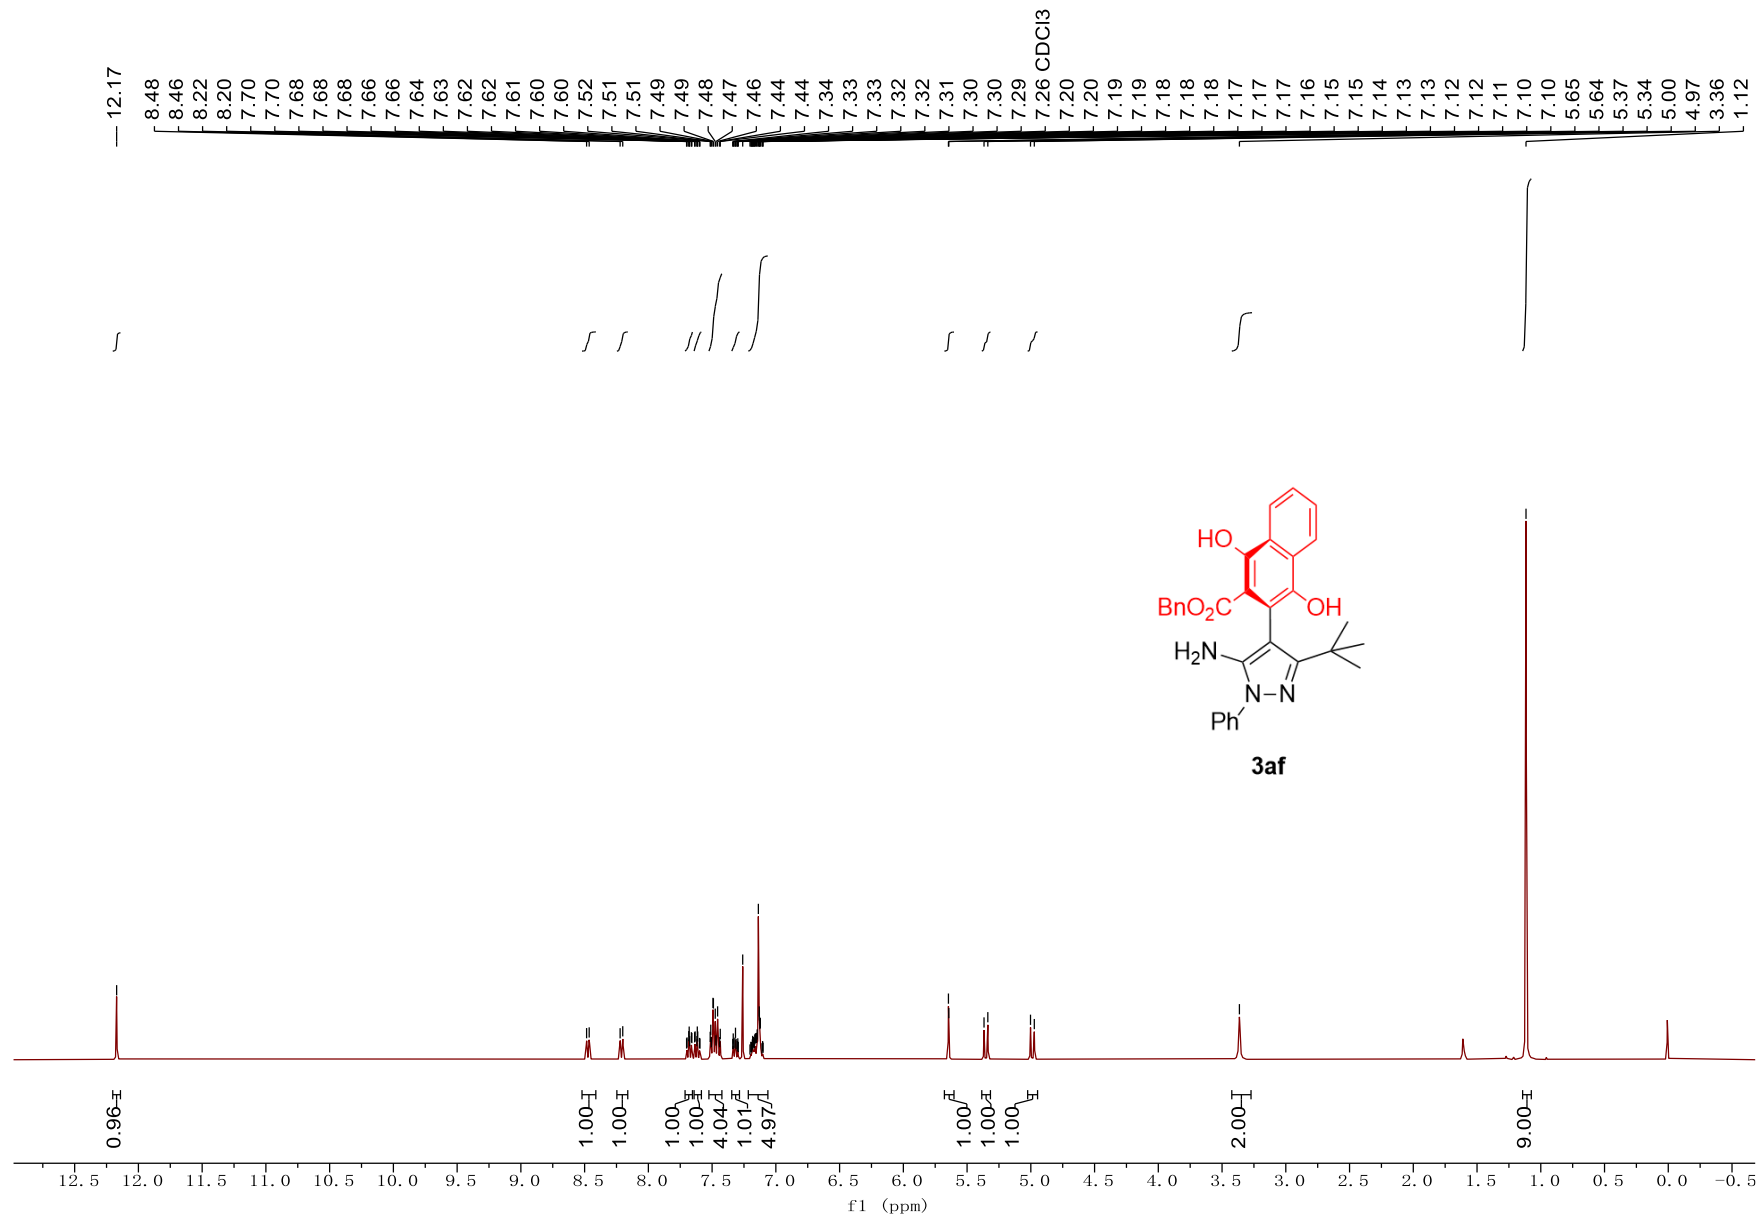

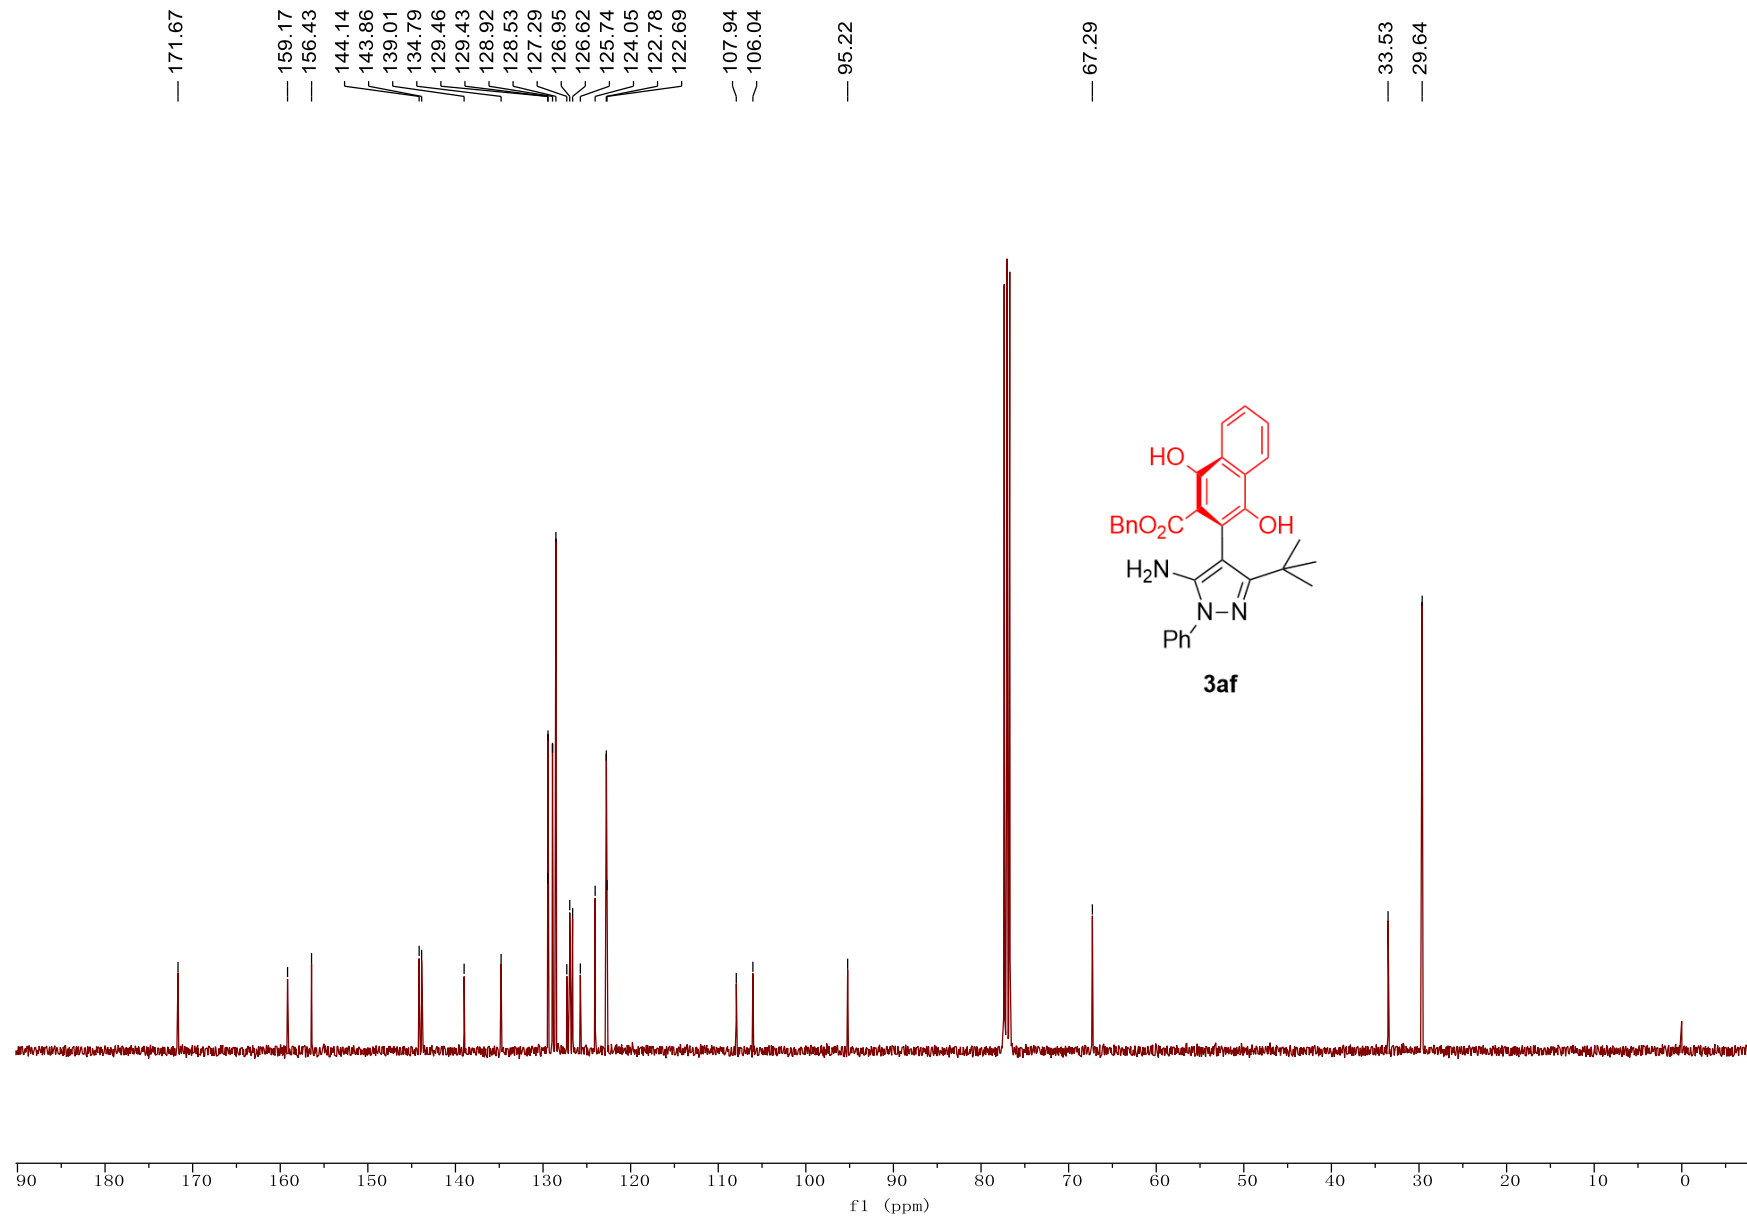

7.91  
7.91  
7.90  
7.89  
7.88  
7.87  
7.68  
7.67  
7.66  
7.65  
7.64  
7.63  
7.63  
7.62  
7.59  
7.56  
7.54  
7.26 CDCl<sub>3</sub>

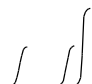

— 3.71  
— 3.50

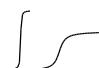

— 2.43  
— 2.21

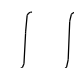

— 1.18

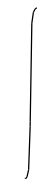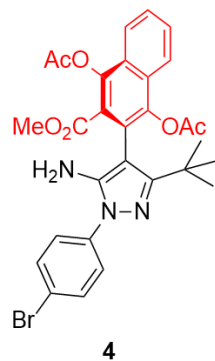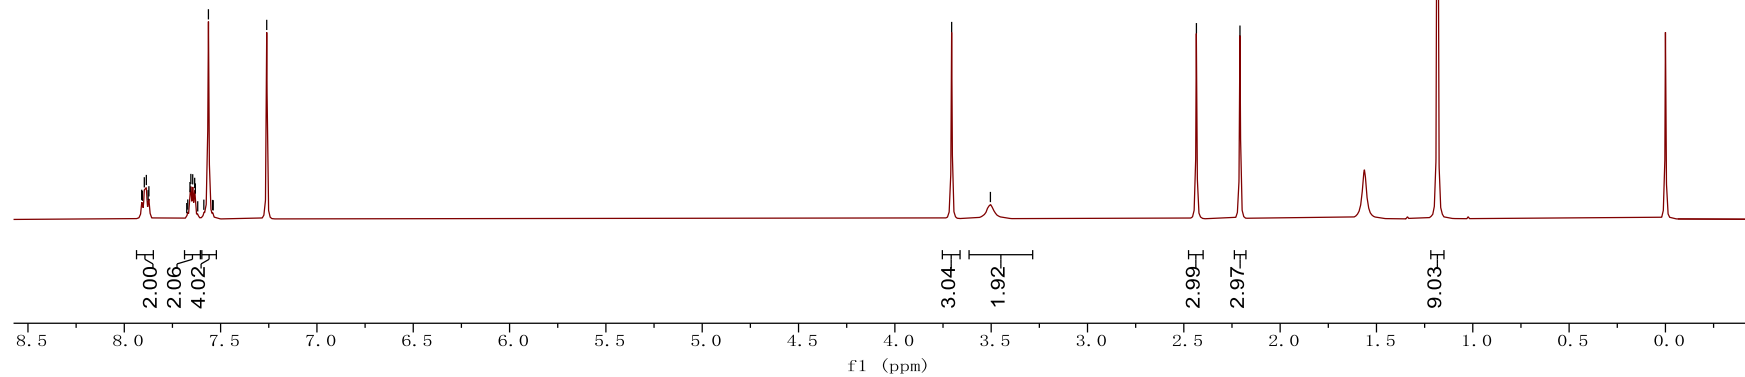



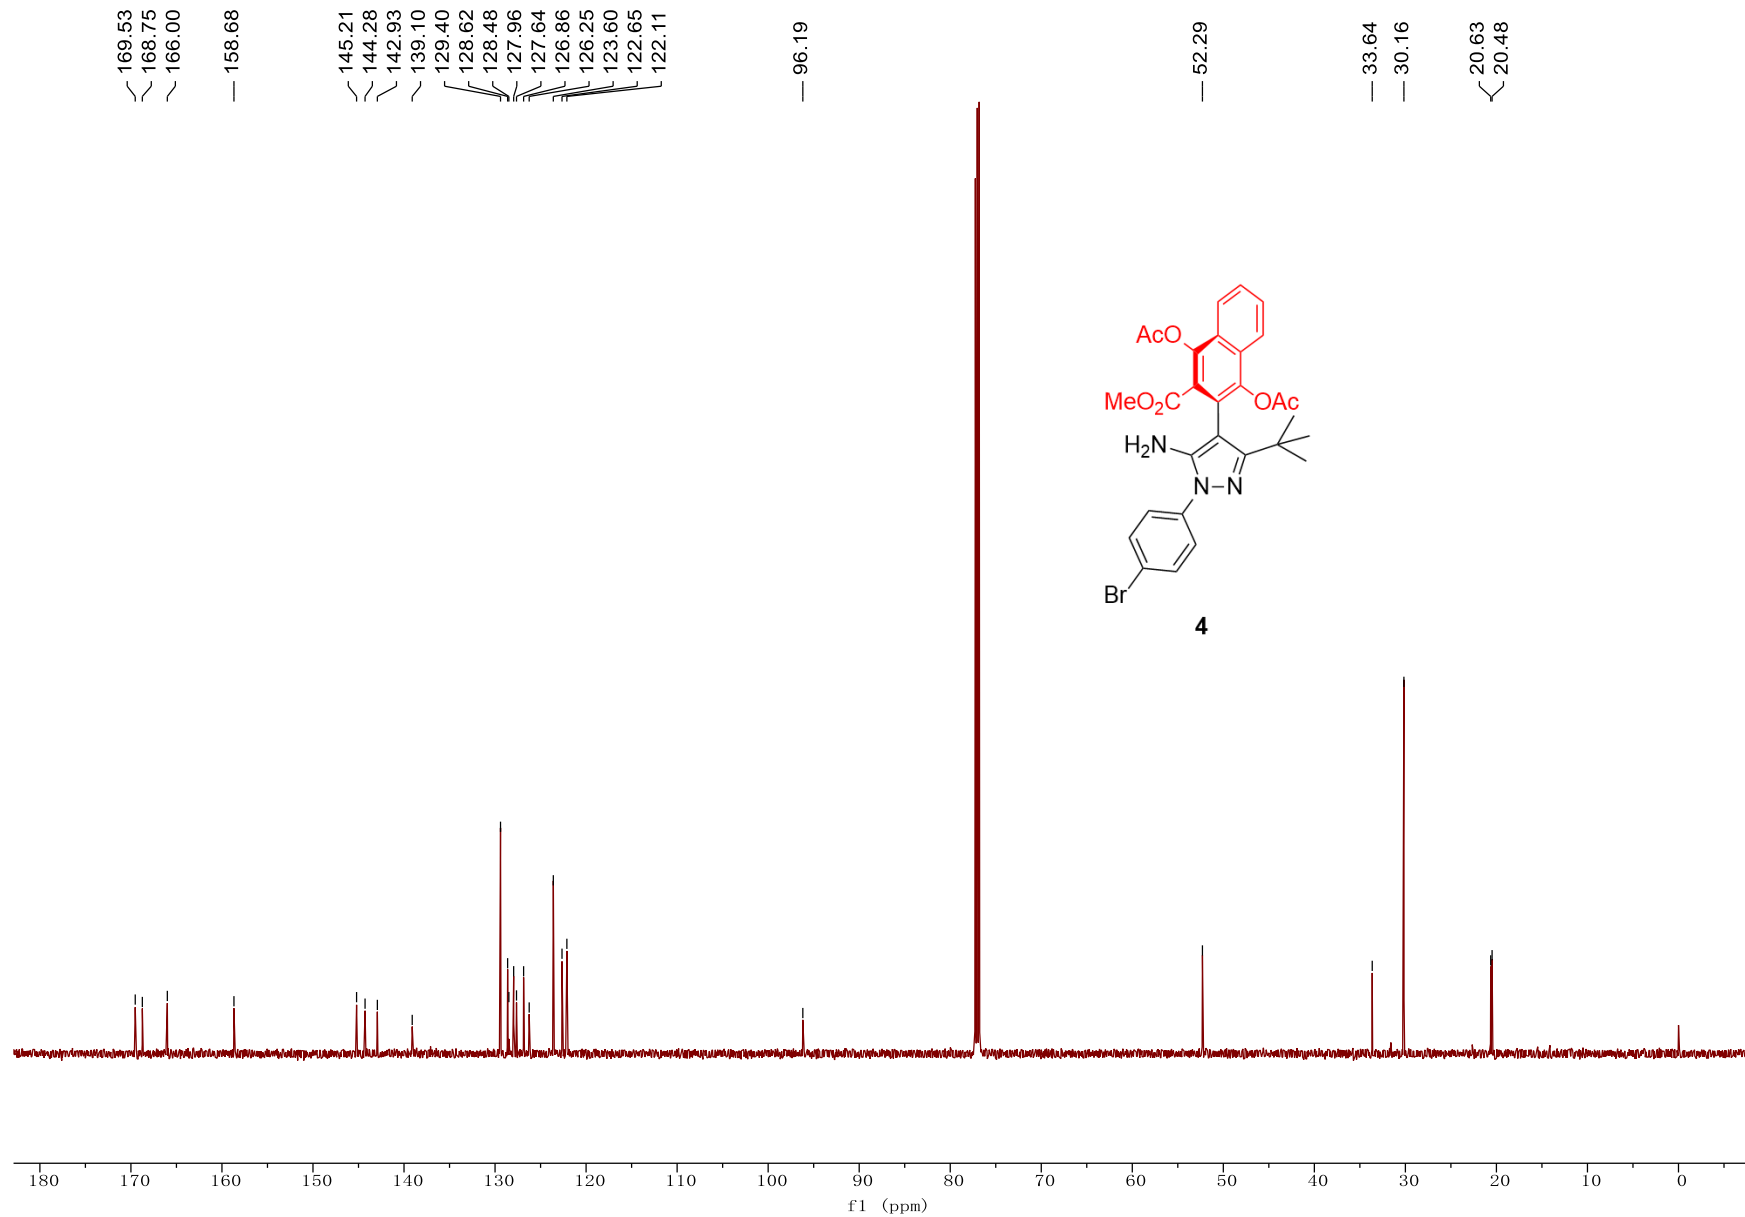

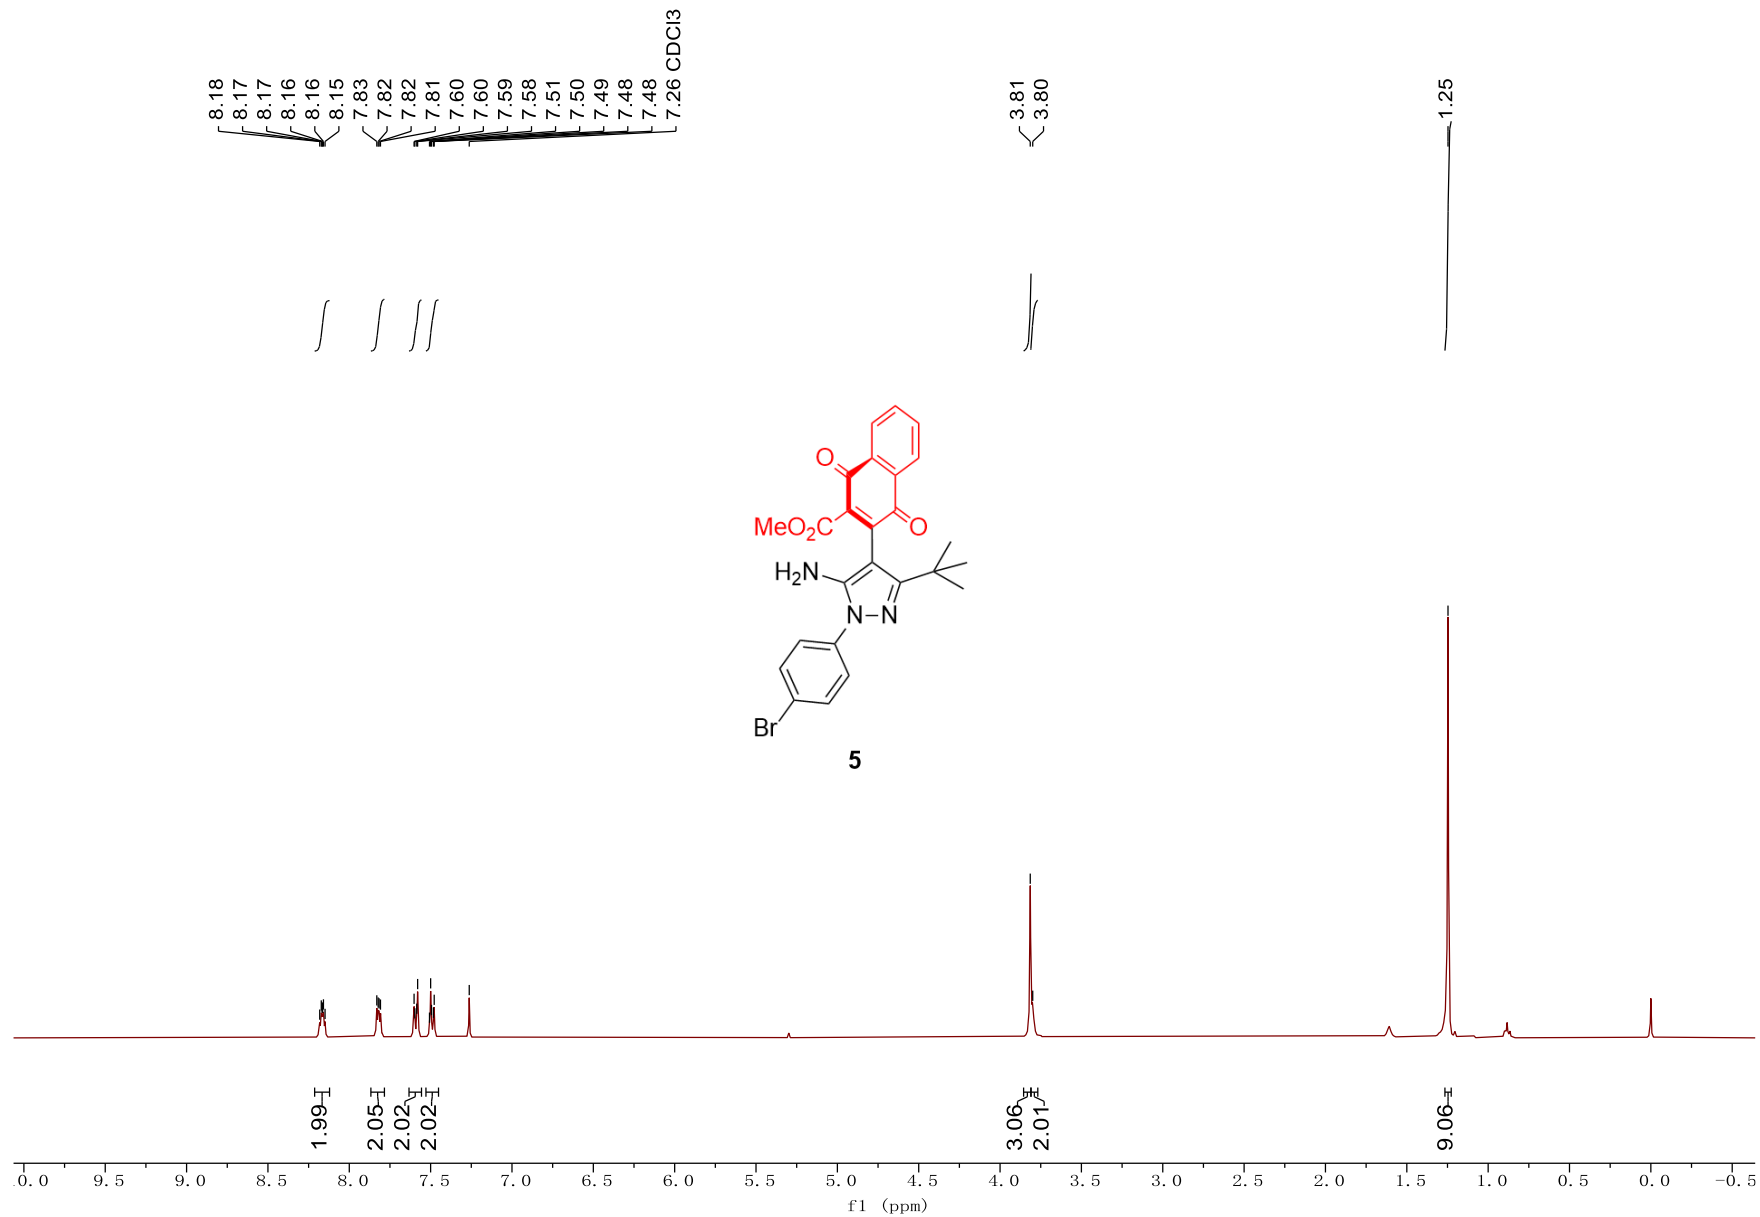

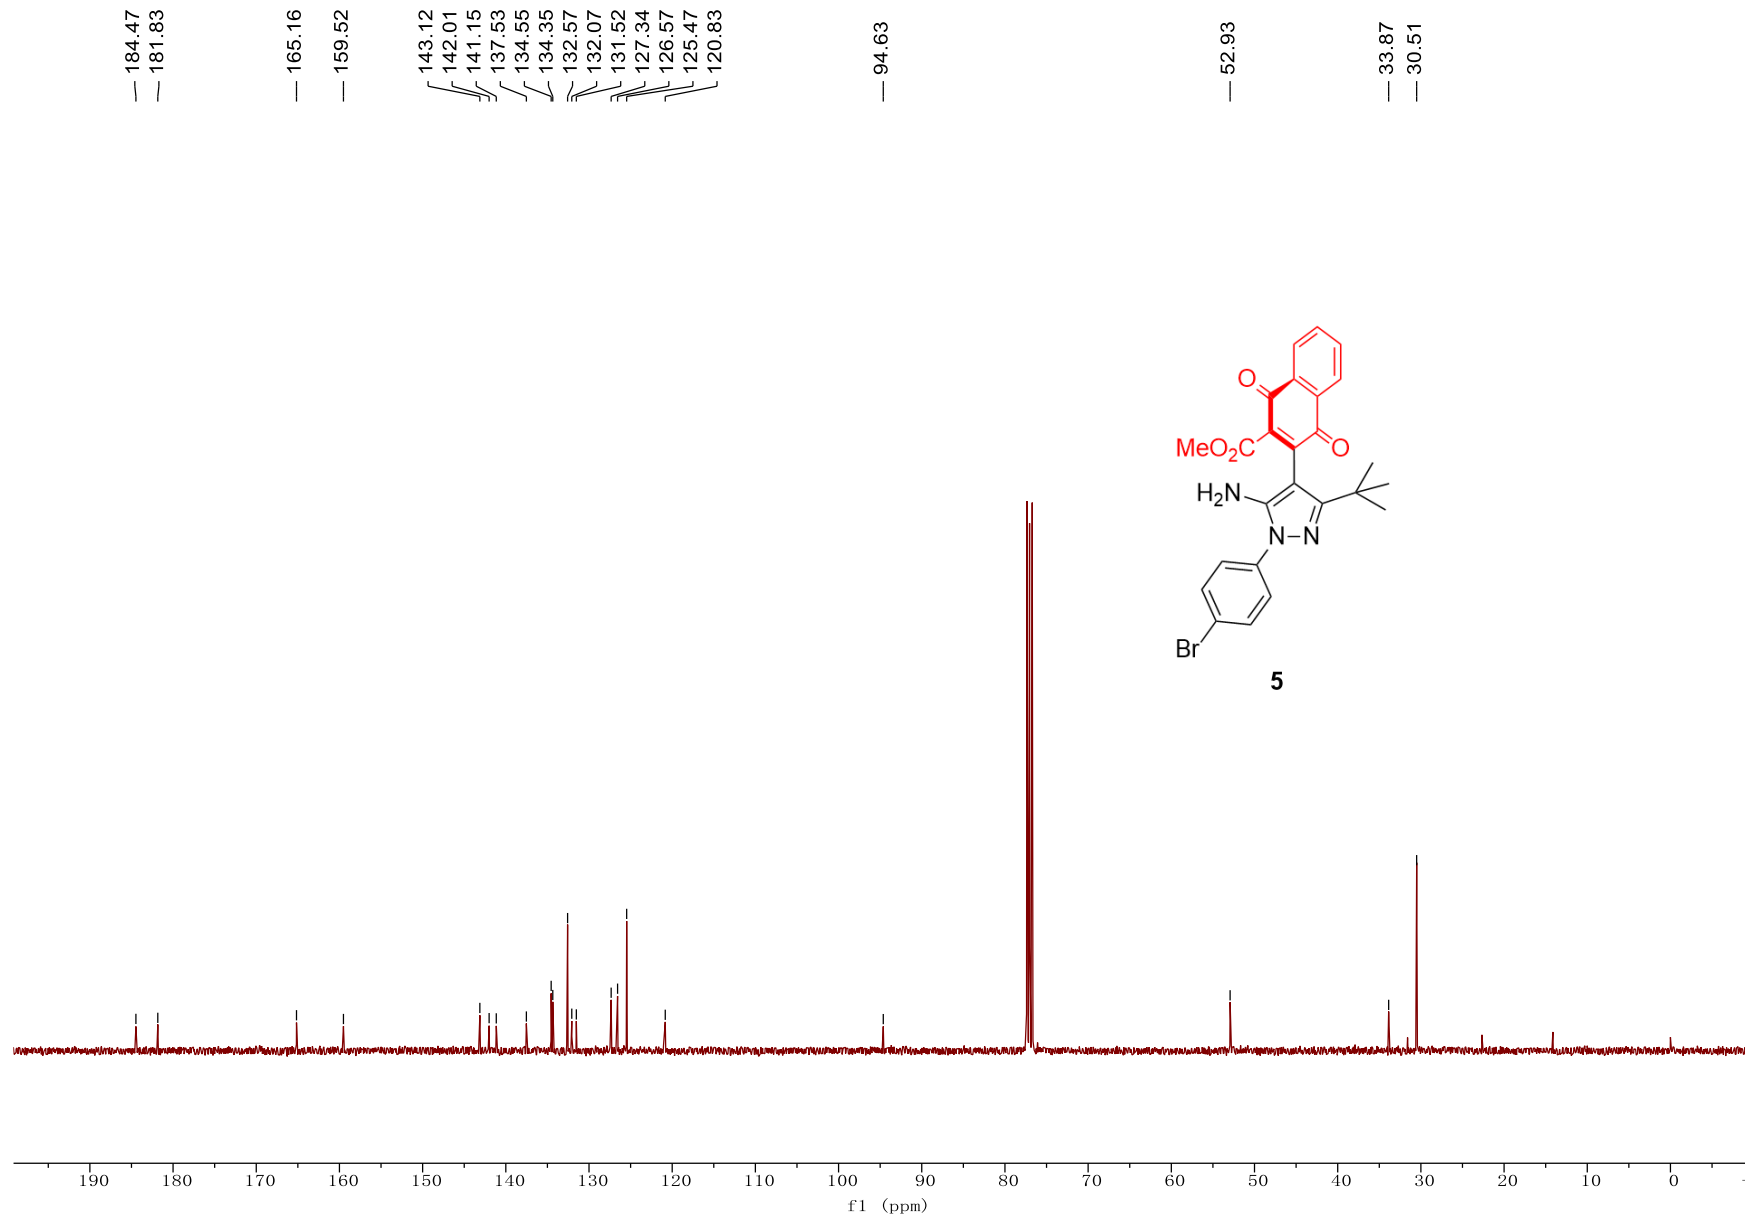

## 8. X-ray crystal structure of 3ha

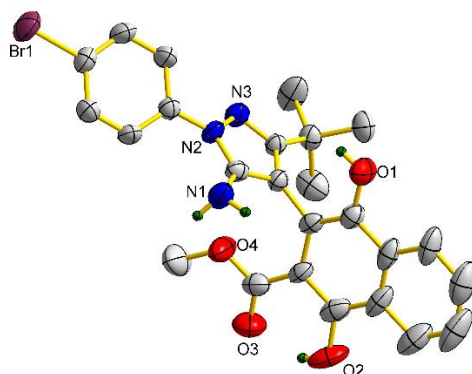

**Figure S2.** ORTEP diagram of **3ha**. Thermal ellipsoids are shown at 50% probability level. All hydrogen atoms on carbon are omitted for clarity.

**CCDC: 2311460**

**Table 1 Crystal data and structure refinement for 1.**

|                                             |                                                                 |
|---------------------------------------------|-----------------------------------------------------------------|
| Identification code                         | 1                                                               |
| Empirical formula                           | C <sub>25</sub> H <sub>24</sub> BrN <sub>3</sub> O <sub>4</sub> |
| Formula weight                              | 510.38                                                          |
| Temperature/K                               | 299.0                                                           |
| Crystal system                              | orthorhombic                                                    |
| Space group                                 | P2 <sub>1</sub> 2 <sub>1</sub> 2 <sub>1</sub>                   |
| a/Å                                         | 8.5837(8)                                                       |
| b/Å                                         | 16.3187(15)                                                     |
| c/Å                                         | 19.3809(17)                                                     |
| α/°                                         | 90                                                              |
| β/°                                         | 90                                                              |
| γ/°                                         | 90                                                              |
| Volume/Å <sup>3</sup>                       | 2714.8(4)                                                       |
| Z                                           | 4                                                               |
| ρ <sub>calc</sub> /cm <sup>3</sup>          | 1.249                                                           |
| μ/mm <sup>-1</sup>                          | 1.546                                                           |
| F(000)                                      | 1048.0                                                          |
| Crystal size/mm <sup>3</sup>                | 0.33 × 0.32 × 0.29                                              |
| Radiation                                   | MoKα (λ = 0.71073)                                              |
| 2θ range for data collection/°              | 4.204 to 52.742                                                 |
| Index ranges                                | -10 ≤ h ≤ 10, -20 ≤ k ≤ 20, -24 ≤ l ≤ 24                        |
| Reflections collected                       | 70426                                                           |
| Independent reflections                     | 5559 [R <sub>int</sub> = 0.0755, R <sub>sigma</sub> = 0.0490]   |
| Data/restraints/parameters                  | 5559/0/306                                                      |
| Goodness-of-fit on F <sup>2</sup>           | 1.020                                                           |
| Final R indexes [I > 2σ (I)]                | R <sub>1</sub> = 0.0539, wR <sub>2</sub> = 0.1205               |
| Final R indexes [all data]                  | R <sub>1</sub> = 0.0944, wR <sub>2</sub> = 0.1364               |
| Largest diff. peak/hole / e Å <sup>-3</sup> | 0.33/-0.44                                                      |
| Flack parameter                             | 0.041(16)                                                       |
